# Supplementary material for: Thermodynamic stability modulates chaperone-mediated disaggregation of α-synuclein fibrils
Source: Royal Society of Chemistry journal article supplement (doi:10.1039/d5sc04927j), 2025-11-11
Supplement: d5sc04927j1.xlsx [file d5sc04927j1.xlsx]

## Sheet: PSMs
Checked	Confidence	Identifying Node	PSM Ambiguity	Annotated Sequence	Modifications	# Proteins	Master Protein Accessions	Protein Accessions	# Missed Cleavages	Charge	DeltaScore	DeltaCn	Rank	Search Engine Rank	m/z [Da]	MH+ [Da]	Theo. MH+ [Da]	DeltaM [ppm]	Deltam/z [Da]	Intensity	Activation Type	MS Order	Isolation Interference [%]	Ion Inject Time [ms]	RT [min]	First Scan	Spectrum File	File ID	XCorr	# Protein Groups
FALSE	High	Sequest HT (A2)	Unambiguous	[K].TKEQVTNVGGAVVTGVTAVAQK.[T]		1	SYUA_HUMAN_P37840	SYUA_HUMAN_P37840	1	3	1	0	1	1	719.737	2157.2	2157.19	4.72	0.00339	19028026	HCD (High Energy Collision Dissociation)	MS2	0.990808	60	18.9155	6511	20241018_FJ_VOLTA_MP_Easy15_45min_1891_DDA_200ng_8.raw	F6	7.5	1
FALSE	High	Sequest HT (A2)	Unambiguous	[K].TKEQVTNVGGAVVTGVTAVAQK.[T]		1	SYUA_HUMAN_P37840	SYUA_HUMAN_P37840	1	3	1	0	1	1	719.74	2157.21	2157.19	8.45	0.00608	37639320	HCD (High Energy Collision Dissociation)	MS2	1.00226	60	18.539	6441	20241018_FJ_VOLTA_MP_Easy15_45min_1891_DDA_200ng_7.raw	F7	7.49	1
FALSE	High	Sequest HT (A2)	Unambiguous	[K].TKEQVTNVGGAVVTGVTAVAQK.[T]		1	SYUA_HUMAN_P37840	SYUA_HUMAN_P37840	1	3	1	0	1	1	719.739	2157.2	2157.19	6.75	0.00486	31390932	HCD (High Energy Collision Dissociation)	MS2	1.79163	60	18.608	4638	20241018_FJ_VOLTA_MP_Easy15_45min_1891_DDA_200ng_13.raw	F1	7.4	1
FALSE	High	Sequest HT (A2)	Unambiguous	[K].EQVTnVGGAVVTGVTAVAQK.[T]	N5(Deamidated)	1	SYUA_HUMAN_P37840	SYUA_HUMAN_P37840	0	3	0.0869	0	1	1	643.684	1929.04	1929.03	4.07	0.00262	26074692	HCD (High Energy Collision Dissociation)	MS2	1.1607	60	24.4814	9068	20241018_FJ_VOLTA_MP_Easy15_45min_1891_DDA_200ng_7.raw	F7	7.25	1
FALSE	High	Sequest HT (A2)	Unambiguous	[K].TKEQVTNVGGAVVTGVTAVAQK.[T]		1	SYUA_HUMAN_P37840	SYUA_HUMAN_P37840	1	3	1	0	1	1	719.738	2157.2	2157.19	5.48	0.00394	10116995	HCD (High Energy Collision Dissociation)	MS2	3.17371	60	18.5203	6362	20241018_FJ_VOLTA_MP_Easy15_45min_1891_DDA_200ng_9.raw	F5	7.25	1
FALSE	High	Sequest HT (A2)	Unambiguous	[K].TKEQVTnVGGAVVTGVTAVAQK.[T]	N7(Deamidated)	1	SYUA_HUMAN_P37840	SYUA_HUMAN_P37840	1	3	0.0552	0	1	1	720.068	2158.19	2158.17	7.76	0.00559	44132352	HCD (High Energy Collision Dissociation)	MS2	1.21182	58.241	20.0478	7048	20241018_FJ_VOLTA_MP_Easy15_45min_1891_DDA_200ng_7.raw	F7	7.24	1
FALSE	High	Sequest HT (A2)	Unambiguous	[K].EQVTnVGGAVVTGVTAVAQK.[T]	N5(Deamidated)	1	SYUA_HUMAN_P37840	SYUA_HUMAN_P37840	0	3	0.0752	0	1	1	643.684	1929.04	1929.03	3.97	0.00255	17996594	HCD (High Energy Collision Dissociation)	MS2	1.53658	60	24.4995	9612	20241018_FJ_VOLTA_MP_Easy15_45min_1891_DDA_200ng_11.raw	F3	7.18	1
FALSE	High	Sequest HT (A2)	Unambiguous	[K].EQVTNVGGAVVTGVTAVAQK.[T]		1	SYUA_HUMAN_P37840	SYUA_HUMAN_P37840	0	3	0.7866	0	1	1	643.356	1928.05	1928.04	5.21	0.00335	36114284	HCD (High Energy Collision Dissociation)	MS2	0.820146	53.078	22.8659	6628	20241018_FJ_VOLTA_MP_Easy15_45min_1891_DDA_200ng_2.raw	F12	7.17	1
FALSE	High	Sequest HT (A2)	Unambiguous	[K].TKEQVTNVGGAVVTGVTAVAQK.[T]		1	SYUA_HUMAN_P37840	SYUA_HUMAN_P37840	1	3	1	0	1	1	719.737	2157.2	2157.19	4.38	0.00315	9958982	HCD (High Energy Collision Dissociation)	MS2	1.63191	60	19.0302	6565	20241018_FJ_VOLTA_MP_Easy15_45min_1891_DDA_200ng_9.raw	F5	7.06	1
FALSE	High	Sequest HT (A2)	Unambiguous	[K].TKEQVTnVGGAVVTGVTAVAQK.[T]	N7(Deamidated)	1	SYUA_HUMAN_P37840	SYUA_HUMAN_P37840	1	3	0.0413	0	1	1	720.069	2158.19	2158.17	9.8	0.00705	23281376	HCD (High Energy Collision Dissociation)	MS2	1.15948	60	25.3852	6071	20241018_FJ_VOLTA_MP_Easy15_45min_1891_DDA_200ng_1_241018150029.raw	F13	7.02	1
FALSE	High	Sequest HT (A2)	Unambiguous	[K].TKEQVTNVGGAVVTGVTAVAQK.[T]		1	SYUA_HUMAN_P37840	SYUA_HUMAN_P37840	1	3	0.7379	0	1	1	719.736	2157.19	2157.19	3.19	0.00229	9220135	HCD (High Energy Collision Dissociation)	MS2	1.51524	60	24.371	5586	20241018_FJ_VOLTA_MP_Easy15_45min_1891_DDA_200ng_1_241018150029.raw	F13	7.02	1
FALSE	High	Sequest HT (A2)	Unambiguous	[K].TKEQVTnVGGAVVTGVTAVAQK.[T]	N7(Deamidated)	1	SYUA_HUMAN_P37840	SYUA_HUMAN_P37840	1	3	0.043	0	1	1	720.065	2158.18	2158.17	4.46	0.00321	16127967	HCD (High Energy Collision Dissociation)	MS2	0.740387	60	20.0858	6057	20241018_FJ_VOLTA_MP_Easy15_45min_1891_DDA_200ng_3.raw	F11	6.97	1
FALSE	High	Sequest HT (A2)	Unambiguous	[K].EQVTNVGGAVVTGVTAVAqK.[T]	Q19(Deamidated)	1	SYUA_HUMAN_P37840	SYUA_HUMAN_P37840	0	3	0.7355	0	1	1	643.683	1929.03	1929.03	2.17	0.0014	6.32861e+06	HCD (High Energy Collision Dissociation)	MS2	1.95584	60	24.0963	9455	20241018_FJ_VOLTA_MP_Easy15_45min_1891_DDA_200ng_12.raw	F2	6.92	1
FALSE	High	Sequest HT (A2)	Unambiguous	[K].TKEqVTNVGGAVVTGVTAVAQK.[T]	Q4(Deamidated)	1	SYUA_HUMAN_P37840	SYUA_HUMAN_P37840	1	3	0.0498	0	1	1	720.063	2158.18	2158.17	2	0.00144	9514324	HCD (High Energy Collision Dissociation)	MS2	0.831889	60	19.8852	5781	20241018_FJ_VOLTA_MP_Easy15_45min_1891_DDA_200ng_4.raw	F10	6.83	1
FALSE	High	Sequest HT (A2)	Unambiguous	[K].EQVTnVGGAVVTGVTAVAQK.[T]	N5(Deamidated)	1	SYUA_HUMAN_P37840	SYUA_HUMAN_P37840	0	3	0.0782	0	1	1	643.684	1929.04	1929.03	4.45	0.00286	11403053	HCD (High Energy Collision Dissociation)	MS2	1.14033	60	24.7807	9088	20241018_FJ_VOLTA_MP_Easy15_45min_1891_DDA_200ng_9.raw	F5	6.78	1
FALSE	High	Sequest HT (A2)	Unambiguous	[K].EQVTNVGGAVVTGVTAVAQK.[T]		1	SYUA_HUMAN_P37840	SYUA_HUMAN_P37840	0	2	0.8059	0	1	1	964.528	1928.05	1928.04	1.58	0.00152	48762580	HCD (High Energy Collision Dissociation)	MS2	0.484832	60	22.8419	8220	20241018_FJ_VOLTA_MP_Easy15_45min_1891_DDA_200ng_9.raw	F5	6.75	1
FALSE	High	Sequest HT (A2)	Unambiguous	[K].TKEqVTNVGGAVVTGVTAVAQK.[T]	Q4(Deamidated)	1	SYUA_HUMAN_P37840	SYUA_HUMAN_P37840	1	3		0.0413	2	2	720.069	2158.19	2158.17	9.8	0.00705	23281376	HCD (High Energy Collision Dissociation)	MS2	1.15948	60	25.3852	6071	20241018_FJ_VOLTA_MP_Easy15_45min_1891_DDA_200ng_1_241018150029.raw	F13	6.73	1
FALSE	High	Sequest HT (A2)	Unambiguous	[K].TKEqVTNVGGAVVTGVTAVAQK.[T]	Q4(Deamidated)	1	SYUA_HUMAN_P37840	SYUA_HUMAN_P37840	1	3		0.043	2	2	720.065	2158.18	2158.17	4.46	0.00321	16127967	HCD (High Energy Collision Dissociation)	MS2	0.740387	60	20.0858	6057	20241018_FJ_VOLTA_MP_Easy15_45min_1891_DDA_200ng_3.raw	F11	6.67	1
FALSE	High	Sequest HT (A2)	Unambiguous	[K].TKEQVTnVGGAVVTGVTAVAQK.[T]	N7(Deamidated)	1	SYUA_HUMAN_P37840	SYUA_HUMAN_P37840	1	3	0.0742	0	1	1	720.065	2158.18	2158.17	3.69	0.00266	4.42334e+06	HCD (High Energy Collision Dissociation)	MS2	1.02878	60	23.4613	8583	20241018_FJ_VOLTA_MP_Easy15_45min_1891_DDA_200ng_7.raw	F7	6.6	1
FALSE	High	Sequest HT (A2)	Unambiguous	[K].EQVTNVGGAVVTGVTAVAQK.[T]		1	SYUA_HUMAN_P37840	SYUA_HUMAN_P37840	0	2	0.8136	0	1	1	964.527	1928.05	1928.04	1.14	0.0011	21487918	HCD (High Energy Collision Dissociation)	MS2	0.561998	60	22.6692	8224	20241018_FJ_VOLTA_MP_Easy15_45min_1891_DDA_200ng_7.raw	F7	6.6	1
FALSE	High	Sequest HT (A2)	Unambiguous	[K].EQVTNVGGAVVTGVTAVAqK.[T]	Q19(Deamidated)	1	SYUA_HUMAN_P37840	SYUA_HUMAN_P37840	0	3	0.7515	0	1	1	643.683	1929.03	1929.03	2.26	0.00146	4993506	HCD (High Energy Collision Dissociation)	MS2	1.67013	60	24.0285	6127	20241018_FJ_VOLTA_MP_Easy15_45min_1891_DDA_200ng_13.raw	F1	6.52	1
FALSE	High	Sequest HT (A2)	Unambiguous	[K].TKEQVTnVGGAVVTGVTAVAQK.[T]	N7(Deamidated)	1	SYUA_HUMAN_P37840	SYUA_HUMAN_P37840	1	3		0.0498	2	2	720.063	2158.18	2158.17	2	0.00144	9514324	HCD (High Energy Collision Dissociation)	MS2	0.831889	60	19.8852	5781	20241018_FJ_VOLTA_MP_Easy15_45min_1891_DDA_200ng_4.raw	F10	6.49	1
FALSE	High	Sequest HT (A2)	Unambiguous	[K].TKEqVTNVGGAVVTGVTAVAqK.[T]	Q4(Deamidated); Q21(Deamidated)	1	SYUA_HUMAN_P37840	SYUA_HUMAN_P37840	1	3	0.7032	0	1	1	720.394	2159.17	2159.16	5.55	0.004	12190343	HCD (High Energy Collision Dissociation)	MS2	1.85766	60	21.5855	7668	20241018_FJ_VOLTA_MP_Easy15_45min_1891_DDA_200ng_9.raw	F5	6.47	1
FALSE	High	Sequest HT (A2)	Unambiguous	[K].TKEQVTNVGGAVVTGVTAVAqK.[T]	Q21(Deamidated)	1	SYUA_HUMAN_P37840	SYUA_HUMAN_P37840	1	3	0.0898	0	1	1	720.068	2158.19	2158.17	7.85	0.00565	19042684	HCD (High Energy Collision Dissociation)	MS2	1.62268	60	20.0518	6986	20241018_FJ_VOLTA_MP_Easy15_45min_1891_DDA_200ng_9.raw	F5	6.46	1
FALSE	High	Sequest HT (A2)	Unambiguous	[K].EQVTNVGGAVVTGVTAVAQK.[T]		1	SYUA_HUMAN_P37840	SYUA_HUMAN_P37840	0	2	0.8313	0	1	1	964.529	1928.05	1928.04	3.1	0.00299	195893520	HCD (High Energy Collision Dissociation)	MS2	1.09182	20.712	22.5944	8670	20241018_FJ_VOLTA_MP_Easy15_45min_1891_DDA_200ng_11.raw	F3	6.46	1
FALSE	High	Sequest HT (A2)	Unambiguous	[K].TKEQVTNVGGAVVTGVTAVAQK.[T]		1	SYUA_HUMAN_P37840	SYUA_HUMAN_P37840	1	3	0.7379	0	1	1	719.736	2157.19	2157.19	2.93	0.00211	4144373	HCD (High Energy Collision Dissociation)	MS2	1.54796	60	19.0421	6640	20241018_FJ_VOLTA_MP_Easy15_45min_1891_DDA_200ng_7.raw	F7	6.41	1
FALSE	High	Sequest HT (A2)	Unambiguous	[K].EqVTNVGGAVVTGVTAVAQK.[T]	Q2(Deamidated)	1	SYUA_HUMAN_P37840	SYUA_HUMAN_P37840	0	3	0.0709	0	1	1	643.683	1929.04	1929.03	3.59	0.00231	7848375	HCD (High Energy Collision Dissociation)	MS2	1.94647	60	23.7605	8635	20241018_FJ_VOLTA_MP_Easy15_45min_1891_DDA_200ng_9.raw	F5	6.35	1
FALSE	High	Sequest HT (A2)	Unambiguous	[K].TKEQVTNVGGAVVTGVTAVAQK.[T]		1	SYUA_HUMAN_P37840	SYUA_HUMAN_P37840	1	3	1	0	1	1	719.736	2157.19	2157.19	3.02	0.00217	3486034	HCD (High Energy Collision Dissociation)	MS2	1.2653	60	18.4017	6782	20241018_FJ_VOLTA_MP_Easy15_45min_1891_DDA_200ng_12.raw	F2	6.34	1
FALSE	High	Sequest HT (A2)	Unambiguous	[K].TKEqVTNVGGAVVTGVTAVAqK.[T]	Q4(Deamidated); Q21(Deamidated)	1	SYUA_HUMAN_P37840	SYUA_HUMAN_P37840	1	3	0.5667	0	1	1	720.391	2159.16	2159.16	1.06	0.00076	4187610	HCD (High Energy Collision Dissociation)	MS2	4.11696	60	25.8988	6319	20241018_FJ_VOLTA_MP_Easy15_45min_1891_DDA_200ng_1_241018150029.raw	F13	6.3	1
FALSE	High	Sequest HT (A2)	Unambiguous	[K].TKEqVTnVGGAVVTGVTAVAqK.[T]	Q4(Deamidated); N7(Deamidated); Q21(Deamidated)	1	SYUA_HUMAN_P37840	SYUA_HUMAN_P37840	1	3	0.7095	0	1	1	720.72	2160.15	2160.14	3.26	0.00235	4.78952e+06	HCD (High Energy Collision Dissociation)	MS2	2.38189	60	22.5999	8121	20241018_FJ_VOLTA_MP_Easy15_45min_1891_DDA_200ng_9.raw	F5	6.3	1
FALSE	High	Sequest HT (A2)	Unambiguous	[K].EQVTnVGGAVVTGVTAVAQK.[T]	N5(Deamidated)	1	SYUA_HUMAN_P37840	SYUA_HUMAN_P37840	0	3	0.1079	0	1	1	643.682	1929.03	1929.03	1.79	0.00115	5274659	HCD (High Energy Collision Dissociation)	MS2	1.2267	60	24.5142	7707	20241018_FJ_VOLTA_MP_Easy15_45min_1891_DDA_200ng_3.raw	F11	6.3	1
FALSE	High	Sequest HT (A2)	Unambiguous	[K].TKEQVTnVGGAVVTGVTAVAQK.[T]	N7(Deamidated)	1	SYUA_HUMAN_P37840	SYUA_HUMAN_P37840	1	3	0.0016	0	1	1	720.065	2158.18	2158.17	3.86	0.00278	6.35522e+06	HCD (High Energy Collision Dissociation)	MS2	1.29206	60	20.5578	7275	20241018_FJ_VOLTA_MP_Easy15_45min_1891_DDA_200ng_7.raw	F7	6.29	1
FALSE	High	Sequest HT (A2)	Unambiguous	[K].TKEqVTNVGGAVVTGVTAVAQK.[T]	Q4(Deamidated)	1	SYUA_HUMAN_P37840	SYUA_HUMAN_P37840	1	3		0.0016	2	2	720.065	2158.18	2158.17	3.86	0.00278	6.35522e+06	HCD (High Energy Collision Dissociation)	MS2	1.29206	60	20.5578	7275	20241018_FJ_VOLTA_MP_Easy15_45min_1891_DDA_200ng_7.raw	F7	6.28	1
FALSE	High	Sequest HT (A2)	Unambiguous	[K].EQVTNVGGAVVTGVTAVAQK.[T]		1	SYUA_HUMAN_P37840	SYUA_HUMAN_P37840	0	3	1	0	1	1	643.355	1928.05	1928.04	3.31	0.00213	5.9885e+06	HCD (High Energy Collision Dissociation)	MS2	5.45042	60	22.9561	8354	20241018_FJ_VOLTA_MP_Easy15_45min_1891_DDA_200ng_7.raw	F7	6.27	1
FALSE	High	Sequest HT (A2)	Unambiguous	[K].TKEqVTNVGGAVVTGVTAVAqK.[T]	Q4(Deamidated); Q21(Deamidated)	1	SYUA_HUMAN_P37840	SYUA_HUMAN_P37840	1	3	1	0	1	1	720.391	2159.16	2159.16	1.57	0.00113	3367774	HCD (High Energy Collision Dissociation)	MS2	5.84042	60	21.0756	7449	20241018_FJ_VOLTA_MP_Easy15_45min_1891_DDA_200ng_9.raw	F5	6.24	1
FALSE	High	Sequest HT (A2)	Unambiguous	[K].EQVTnVGGAVVTGVTAVAQK.[T]	N5(Deamidated)	1	SYUA_HUMAN_P37840	SYUA_HUMAN_P37840	0	2	0.1664	0	1	1	965.019	1929.03	1929.03	1.51	0.00146	6.56458e+06	HCD (High Energy Collision Dissociation)	MS2	0.897781	60	24.8668	9120	20241018_FJ_VOLTA_MP_Easy15_45min_1891_DDA_200ng_9.raw	F5	6.19	1
FALSE	High	Sequest HT (A2)	Unambiguous	[K].TKEQVTNVGGAVVTGVTAVAQK.[T]		1	SYUA_HUMAN_P37840	SYUA_HUMAN_P37840	1	3	0.7618	0	1	1	719.735	2157.19	2157.19	1.74	0.00125	1.88307e+06	HCD (High Energy Collision Dissociation)	MS2	1.14065	60	18.8773	5478	20241018_FJ_VOLTA_MP_Easy15_45min_1891_DDA_200ng_4.raw	F10	6.13	1
FALSE	High	Sequest HT (A2)	Unambiguous	[K].TKEQVTNVGGAVVTGVTAVAQK.[T]		1	SYUA_HUMAN_P37840	SYUA_HUMAN_P37840	1	3	1	0	1	1	719.736	2157.19	2157.19	2.25	0.00162	2.04531e+06	HCD (High Energy Collision Dissociation)	MS2	17.1733	60	17.8899	6525	20241018_FJ_VOLTA_MP_Easy15_45min_1891_DDA_200ng_11.raw	F3	6.11	1
FALSE	High	Sequest HT (A2)	Unambiguous	[K].TKEqVTNVGGAVVTGVTAVAqK.[T]	Q4(Deamidated); Q21(Deamidated)	1	SYUA_HUMAN_P37840	SYUA_HUMAN_P37840	1	3	1	0	1	1	720.39	2159.16	2159.16	0.46	0.00033	2.35222e+06	HCD (High Energy Collision Dissociation)	MS2	2.71923	60	20.9024	6124	20241018_FJ_VOLTA_MP_Easy15_45min_1891_DDA_200ng_4.raw	F10	6.09	1
FALSE	High	Sequest HT (A2)	Unambiguous	[K].EQVTnVGGAVVTGVTAVAQK.[T]	N5(Deamidated)	1	SYUA_HUMAN_P37840	SYUA_HUMAN_P37840	0	3	0.098	0	1	1	643.683	1929.03	1929.03	2.36	0.00152	3.33973e+06	HCD (High Energy Collision Dissociation)	MS2	5.60871	60	27.1703	6903	20241018_FJ_VOLTA_MP_Easy15_45min_1891_DDA_200ng_1_241018150029.raw	F13	6.02	1
FALSE	High	Sequest HT (A2)	Unambiguous	[K].EQVTNVGGAVVTGVTAVAQK.[T]		1	SYUA_HUMAN_P37840	SYUA_HUMAN_P37840	0	3	0.7687	0	1	1	643.355	1928.05	1928.04	2.65	0.0017	3.50052e+06	HCD (High Energy Collision Dissociation)	MS2	1.92965	60	26.1478	6443	20241018_FJ_VOLTA_MP_Easy15_45min_1891_DDA_200ng_1_241018150029.raw	F13	6.01	1
FALSE	High	Sequest HT (A2)	Unambiguous	[K].TKEQVTNVGGAVVTGVTAVAQK.[T]		1	SYUA_HUMAN_P37840	SYUA_HUMAN_P37840	1	4	1	0	1	1	540.053	2157.19	2157.19	1.94	0.00104	3.1819e+06	HCD (High Energy Collision Dissociation)	MS2	0	60	18.7346	6890	20241018_FJ_VOLTA_MP_Easy15_45min_1891_DDA_200ng_11.raw	F3	6.01	1
FALSE	High	Sequest HT (A2)	Unambiguous	[K].TKEQVTNVGGAVVTGVTAVAQK.[T]		1	SYUA_HUMAN_P37840	SYUA_HUMAN_P37840	1	3	0.7343	0	1	1	719.736	2157.19	2157.19	3.36	0.00241	5063858	HCD (High Energy Collision Dissociation)	MS2	1.45799	60	19.1657	7068	20241018_FJ_VOLTA_MP_Easy15_45min_1891_DDA_200ng_11.raw	F3	5.91	1
FALSE	High	Sequest HT (A2)	Unambiguous	[K].TKEqVTNVGGAVVTGVTAVAqK.[T]	Q4(Deamidated); Q21(Deamidated)	1	SYUA_HUMAN_P37840	SYUA_HUMAN_P37840	1	3	0.6497	0	1	1	720.389	2159.15	2159.16	-1.06	-0.00076	4134576	HCD (High Energy Collision Dissociation)	MS2	1.46781	60	21.1007	6407	20241018_FJ_VOLTA_MP_Easy15_45min_1891_DDA_200ng_3.raw	F11	5.88	1
FALSE	High	Sequest HT (A2)	Unambiguous	[K].EQVTnVGGAVVTGVTAVAQK.[T]	N5(Deamidated)	1	SYUA_HUMAN_P37840	SYUA_HUMAN_P37840	0	2	0.2376	0	1	1	965.022	1929.04	1929.03	3.73	0.00359	4957604	HCD (High Energy Collision Dissociation)	MS2	2.39797	60	24.1197	9417	20241018_FJ_VOLTA_MP_Easy15_45min_1891_DDA_200ng_11.raw	F3	5.85	1
FALSE	High	Sequest HT (A2)	Unambiguous	[K].TKEqVTNVGGAVVTGVTAVAqK.[T]	Q4(Deamidated); Q21(Deamidated)	1	SYUA_HUMAN_P37840	SYUA_HUMAN_P37840	1	3	0.5515	0	1	1	720.392	2159.16	2159.16	2.5	0.0018	2.13892e+06	HCD (High Energy Collision Dissociation)	MS2	2.59844	60	21.6078	6595	20241018_FJ_VOLTA_MP_Easy15_45min_1891_DDA_200ng_3.raw	F11	5.82	1
FALSE	High	Sequest HT (A2)	Unambiguous	[K].EqVTNVGGAVVTGVTAVAQK.[T]	Q2(Deamidated)	1	SYUA_HUMAN_P37840	SYUA_HUMAN_P37840	0	2	0.1649	0	1	1	965.02	1929.03	1929.03	2.34	0.00225	8.32658e+06	HCD (High Energy Collision Dissociation)	MS2	2.98625	60	23.6122	9172	20241018_FJ_VOLTA_MP_Easy15_45min_1891_DDA_200ng_11.raw	F3	5.82	1
FALSE	High	Sequest HT (A2)	Unambiguous	[K].TKEQVTNVGGAVVTGVTAVAqK.[T]	Q21(Deamidated)	1	SYUA_HUMAN_P37840	SYUA_HUMAN_P37840	1	4	0.4439	0	1	1	540.299	2158.17	2158.17	1.65	0.00089	10386907	HCD (High Energy Collision Dissociation)	MS2	1.30004	60	19.7417	7319	20241018_FJ_VOLTA_MP_Easy15_45min_1891_DDA_200ng_11.raw	F3	5.79	1
FALSE	High	Sequest HT (A2)	Unambiguous	[K].TKEqVTNVGGAVVTGVTAVAQK.[T]	Q4(Deamidated)	1	SYUA_HUMAN_P37840	SYUA_HUMAN_P37840	1	3	0.0587	0	1	1	720.063	2158.18	2158.17	1.91	0.00137	3.2425e+06	HCD (High Energy Collision Dissociation)	MS2	2.09391	60	19.6156	4875	20241018_FJ_VOLTA_MP_Easy15_45min_1891_DDA_200ng_13.raw	F1	5.79	1
FALSE	High	Sequest HT (A2)	Unambiguous	[K].TKEqVTnVGGAVVTGVTAVAQK.[T]	Q4(Deamidated); N7(Deamidated)	1	SYUA_HUMAN_P37840	SYUA_HUMAN_P37840	1	3	0.6972	0	1	1	720.392	2159.16	2159.16	2.92	0.0021	2317344	HCD (High Energy Collision Dissociation)	MS2	1.22814	60	27.1132	6876	20241018_FJ_VOLTA_MP_Easy15_45min_1891_DDA_200ng_1_241018150029.raw	F13	5.78	1
FALSE	High	Sequest HT (A2)	Unambiguous	[K].TKEQVTnVGGAVVTGVTAVAQK.[T]	N7(Deamidated)	1	SYUA_HUMAN_P37840	SYUA_HUMAN_P37840	1	3	0.0282	0	1	1	720.062	2158.17	2158.17	0.55	0.0004	6287574	HCD (High Energy Collision Dissociation)	MS2	1.20271	60	20.2426	5752	20241018_FJ_VOLTA_MP_Easy15_45min_1891_DDA_200ng_2.raw	F12	5.68	1
FALSE	High	Sequest HT (A2)	Unambiguous	[K].EQVTNVGGAVVTGVTAVAqK.[T]	Q19(Deamidated)	1	SYUA_HUMAN_P37840	SYUA_HUMAN_P37840	0	2	0.6755	0	1	1	965.02	1929.03	1929.03	1.64	0.00158	3.9492e+06	HCD (High Energy Collision Dissociation)	MS2	1.42444	60	24.0354	9423	20241018_FJ_VOLTA_MP_Easy15_45min_1891_DDA_200ng_12.raw	F2	5.67	1
FALSE	High	Sequest HT (A2)	Unambiguous	[K].EQVTNVGGAVVTGVTAVAqK.[T]	Q19(Deamidated)	1	SYUA_HUMAN_P37840	SYUA_HUMAN_P37840	0	3	0.4415	0	1	1	643.683	1929.04	1929.03	3.31	0.00213	2.02004e+06	HCD (High Energy Collision Dissociation)	MS2	16.6299	60	23.9914	9359	20241018_FJ_VOLTA_MP_Easy15_45min_1891_DDA_200ng_11.raw	F3	5.64	1
FALSE	High	Sequest HT (A2)	Unambiguous	[K].TKEGVVHGVATVAEK.[T]		1	SYUA_HUMAN_P37840	SYUA_HUMAN_P37840	1	2	0.7323	0	1	1	762.921	1524.84	1524.84	-1.98	-0.00151	2255407	HCD (High Energy Collision Dissociation)	MS2	0	60	6.3654	1401	20241018_FJ_VOLTA_MP_Easy15_45min_1891_DDA_200ng_11.raw	F3	5.64	1
FALSE	High	Sequest HT (A2)	Unambiguous	[K].EQVTNVGGAVVTGVTAVAqK.[T]	Q19(Deamidated)	1	SYUA_HUMAN_P37840	SYUA_HUMAN_P37840	0	2	0.6188	0	1	1	965.02	1929.03	1929.03	2.15	0.00207	2775165	HCD (High Energy Collision Dissociation)	MS2	4.9604	60	24.2097	8938	20241018_FJ_VOLTA_MP_Easy15_45min_1891_DDA_200ng_7.raw	F7	5.64	1
FALSE	High	Sequest HT (A2)	Unambiguous	[K].EQVTnVGGAVVTGVTAVAQK.[T]	N5(Deamidated)	1	SYUA_HUMAN_P37840	SYUA_HUMAN_P37840	0	2	0.169	0	1	1	965.021	1929.03	1929.03	2.78	0.00268	1.8629e+06	HCD (High Energy Collision Dissociation)	MS2	0	60	24.6257	9676	20241018_FJ_VOLTA_MP_Easy15_45min_1891_DDA_200ng_11.raw	F3	5.62	1
FALSE	High	Sequest HT (A2)	Unambiguous	[K].EqVTNVGGAVVTGVTAVAQK.[T]	Q2(Deamidated)	1	SYUA_HUMAN_P37840	SYUA_HUMAN_P37840	0	2	0.0589	0	1	1	965.02	1929.03	1929.03	1.7	0.00164	6.23857e+06	HCD (High Energy Collision Dissociation)	MS2	1.41227	60	23.8565	8679	20241018_FJ_VOLTA_MP_Easy15_45min_1891_DDA_200ng_9.raw	F5	5.6	1
FALSE	High	Sequest HT (A2)	Unambiguous	[K].EQVTnVGGAVVTGVTAVAQK.[T]	N5(Deamidated)	1	SYUA_HUMAN_P37840	SYUA_HUMAN_P37840	0	3	0.0863	0	1	1	643.682	1929.03	1929.03	1.6	0.00103	2.75822e+06	HCD (High Energy Collision Dissociation)	MS2	1.10102	60	24.8886	7357	20241018_FJ_VOLTA_MP_Easy15_45min_1891_DDA_200ng_2.raw	F12	5.56	1
FALSE	High	Sequest HT (A2)	Unambiguous	[K].TKEGVVhGVATVAEK.[T]	H7(Oxidation)	1	SYUA_HUMAN_P37840	SYUA_HUMAN_P37840	1	3	0.1045	0	1	1	514.285	1540.84	1540.83	4.93	0.00253	4.51596e+06	HCD (High Energy Collision Dissociation)	MS2	2.13197	60	9.1809	2693	20241018_FJ_VOLTA_MP_Easy15_45min_1891_DDA_200ng_11.raw	F3	5.55	1
FALSE	High	Sequest HT (A2)	Unambiguous	[K].TKEGVVHGVATVAEK.[T]		1	SYUA_HUMAN_P37840	SYUA_HUMAN_P37840	1	2	0.7866	0	1	1	762.92	1524.83	1524.84	-3.02	-0.00231	4.24846e+06	HCD (High Energy Collision Dissociation)	MS2	0	60	21.0774	3939	20241018_FJ_VOLTA_MP_Easy15_45min_1891_DDA_200ng_1_241018150029.raw	F13	5.53	1
FALSE	High	Sequest HT (A2)	Unambiguous	[K].TKEqVTNVGGAVVTGVTAVAQK.[T]	Q4(Deamidated)	1	SYUA_HUMAN_P37840	SYUA_HUMAN_P37840	1	3		0.0282	2	2	720.062	2158.17	2158.17	0.55	0.0004	6287574	HCD (High Energy Collision Dissociation)	MS2	1.20271	60	20.2426	5752	20241018_FJ_VOLTA_MP_Easy15_45min_1891_DDA_200ng_2.raw	F12	5.52	1
FALSE	High	Sequest HT (A2)	Unambiguous	[K].TKEQVTNVGGAVVTGVTAVAqK.[T]	Q21(Deamidated)	1	SYUA_HUMAN_P37840	SYUA_HUMAN_P37840	1	3	0.439	0	1	1	720.063	2158.18	2158.17	1.83	0.00131	1.83418e+06	HCD (High Energy Collision Dissociation)	MS2	1.53139	60	19.8372	6220	20241018_FJ_VOLTA_MP_Easy15_45min_1891_DDA_200ng_10.raw	F4	5.49	1
FALSE	High	Sequest HT (A2)	Unambiguous	[K].EQVTNVGGAVVTGVTAVAQK.[T]		1	SYUA_HUMAN_P37840	SYUA_HUMAN_P37840	0	3	0.7573	0	1	1	643.354	1928.05	1928.04	1.98	0.00128	2.37929e+06	HCD (High Energy Collision Dissociation)	MS2	1.61962	60	22.9304	8182	20241018_FJ_VOLTA_MP_Easy15_45min_1891_DDA_200ng_8.raw	F6	5.48	1
FALSE	High	Sequest HT (A2)	Unambiguous	[K].TKEQVTNVGGAVVTGVTAVAQK.[T]		1	SYUA_HUMAN_P37840	SYUA_HUMAN_P37840	1	3	1	0	1	1	719.734	2157.19	2157.19	0.64	0.00046	1.81756e+06	HCD (High Energy Collision Dissociation)	MS2	2.44955	60	18.7117	5250	20241018_FJ_VOLTA_MP_Easy15_45min_1891_DDA_200ng_2.raw	F12	5.47	1
FALSE	High	Sequest HT (A2)	Unambiguous	[K].TKEQVTnVGGAVVTGVTAVAQK.[T]	N7(Deamidated)	1	SYUA_HUMAN_P37840	SYUA_HUMAN_P37840	1	3	0.0402	0	1	1	720.063	2158.17	2158.17	1.57	0.00113	4.935e+06	HCD (High Energy Collision Dissociation)	MS2	1.07092	60	20.5885	6220	20241018_FJ_VOLTA_MP_Easy15_45min_1891_DDA_200ng_3.raw	F11	5.47	1
FALSE	High	Sequest HT (A2)	Unambiguous	[K].TKEQVTNVGGAVVTGVTAVAQK.[T]		1	SYUA_HUMAN_P37840	SYUA_HUMAN_P37840	1	3	0.7569	0	1	1	719.735	2157.19	2157.19	1.57	0.00113	2109393	HCD (High Energy Collision Dissociation)	MS2	0.8291	60	18.9058	7000	20241018_FJ_VOLTA_MP_Easy15_45min_1891_DDA_200ng_12.raw	F2	5.47	1
FALSE	High	Sequest HT (A2)	Unambiguous	[K].EQVTNVGGAVVTGVTAVAQK.[T]		1	SYUA_HUMAN_P37840	SYUA_HUMAN_P37840	0	3	0.7232	0	1	1	643.355	1928.05	1928.04	3.12	0.00201	2833188	HCD (High Energy Collision Dissociation)	MS2	10.7387	60	22.9549	8851	20241018_FJ_VOLTA_MP_Easy15_45min_1891_DDA_200ng_11.raw	F3	5.42	1
FALSE	High	Sequest HT (A2)	Unambiguous	[K].EQVTNVGGAVVTGVTAVAQK.[T]		1	SYUA_HUMAN_P37840	SYUA_HUMAN_P37840	0	3	0.7823	0	1	1	643.354	1928.05	1928.04	2.08	0.00134	2.66028e+06	HCD (High Energy Collision Dissociation)	MS2	7.91777	60	21.9183	8339	20241018_FJ_VOLTA_MP_Easy15_45min_1891_DDA_200ng_11.raw	F3	5.42	1
FALSE	High	Sequest HT (A2)	Unambiguous	[K].TKEqVTNVGGAVVTGVTAVAqK.[T]	Q4(Deamidated); Q21(Deamidated)	1	SYUA_HUMAN_P37840	SYUA_HUMAN_P37840	1	3	1	0	1	1	720.393	2159.16	2159.16	4.11	0.00296	3.8389e+06	HCD (High Energy Collision Dissociation)	MS2	6.38219	60	21.1988	7984	20241018_FJ_VOLTA_MP_Easy15_45min_1891_DDA_200ng_11.raw	F3	5.42	1
FALSE	High	Sequest HT (A2)	Unambiguous	[K].TKEGVVHGVATVAEK.[T]		1	SYUA_HUMAN_P37840	SYUA_HUMAN_P37840	1	4	0.5915	0	1	1	381.964	1524.84	1524.84	-1.68	-0.00064	28148782	HCD (High Energy Collision Dissociation)	MS2	0.955437	46.151	6.4588	1269	20241018_FJ_VOLTA_MP_Easy15_45min_1891_DDA_200ng_9.raw	F5	5.41	1
FALSE	High	Sequest HT (A2)	Unambiguous	[K].TKEqVTNVGGAVVTGVTAVAQK.[T]	Q4(Deamidated)	1	SYUA_HUMAN_P37840	SYUA_HUMAN_P37840	1	3	0.0074	0	1	1	720.065	2158.18	2158.17	3.61	0.00259	3.77144e+06	HCD (High Energy Collision Dissociation)	MS2	2.11068	60	20.5682	7228	20241018_FJ_VOLTA_MP_Easy15_45min_1891_DDA_200ng_9.raw	F5	5.4	1
FALSE	High	Sequest HT (A2)	Unambiguous	[K].TKEqVTnVGGAVVTGVTAVAQK.[T]	Q4(Deamidated); N7(Deamidated)	1	SYUA_HUMAN_P37840	SYUA_HUMAN_P37840	1	3	0.6531	0	1	1	720.392	2159.16	2159.16	2.84	0.00204	2.88575e+06	HCD (High Energy Collision Dissociation)	MS2	7.50309	60	20.7474	5912	20241018_FJ_VOLTA_MP_Easy15_45min_1891_DDA_200ng_2.raw	F12	5.39	1
FALSE	High	Sequest HT (A2)	Unambiguous	[K].TKEQVTnVGGAVVTGVTAVAQK.[T]	N7(Deamidated)	1	SYUA_HUMAN_P37840	SYUA_HUMAN_P37840	1	3		0.0074	2	2	720.065	2158.18	2158.17	3.61	0.00259	3.77144e+06	HCD (High Energy Collision Dissociation)	MS2	2.11068	60	20.5682	7228	20241018_FJ_VOLTA_MP_Easy15_45min_1891_DDA_200ng_9.raw	F5	5.36	1
FALSE	High	Sequest HT (A2)	Unambiguous	[K].EqVTNVGGAVVTGVTAVAQK.[T]	Q2(Deamidated)	1	SYUA_HUMAN_P37840	SYUA_HUMAN_P37840	0	3	0.0804	0	1	1	643.684	1929.04	1929.03	4.35	0.0028	3.19702e+06	HCD (High Energy Collision Dissociation)	MS2	3.57797	60	23.9702	8820	20241018_FJ_VOLTA_MP_Easy15_45min_1891_DDA_200ng_7.raw	F7	5.35	1
FALSE	High	Sequest HT (A2)	Unambiguous	[K].TKEGVVHGVATVAEK.[T]		1	SYUA_HUMAN_P37840	SYUA_HUMAN_P37840	1	3	0.5779	0	1	1	508.951	1524.84	1524.84	-0.11	-6e-05	3969711	HCD (High Energy Collision Dissociation)	MS2	1.5702	60	6.3774	1393	20241018_FJ_VOLTA_MP_Easy15_45min_1891_DDA_200ng_12.raw	F2	5.33	1
FALSE	High	Sequest HT (A2)	Unambiguous	[K].EQVTNVGGAVVTGVTAVAqK.[T]	Q19(Deamidated)	1	SYUA_HUMAN_P37840	SYUA_HUMAN_P37840	0	3	0.621	0	1	1	643.683	1929.03	1929.03	2.64	0.0017	1490933	HCD (High Energy Collision Dissociation)	MS2	8.68924	60	24.2708	8851	20241018_FJ_VOLTA_MP_Easy15_45min_1891_DDA_200ng_9.raw	F5	5.33	1
FALSE	High	Sequest HT (A2)	Unambiguous	[K].EQVTNVGGAVVTGVTAVAQK.[T]		1	SYUA_HUMAN_P37840	SYUA_HUMAN_P37840	0	2	0.8236	0	1	1	964.527	1928.05	1928.04	1.01	0.00097	1.65677e+06	HCD (High Energy Collision Dissociation)	MS2	0	60	22.1557	7987	20241018_FJ_VOLTA_MP_Easy15_45min_1891_DDA_200ng_7.raw	F7	5.33	1
FALSE	High	Sequest HT (A2)	Unambiguous	[K].TKEqVTNVGGAVVTGVTAVAQK.[T]	Q4(Deamidated)	1	SYUA_HUMAN_P37840	SYUA_HUMAN_P37840	1	3		0.0402	2	2	720.063	2158.17	2158.17	1.57	0.00113	4.935e+06	HCD (High Energy Collision Dissociation)	MS2	1.07092	60	20.5885	6220	20241018_FJ_VOLTA_MP_Easy15_45min_1891_DDA_200ng_3.raw	F11	5.25	1
FALSE	High	Sequest HT (A2)	Unambiguous	[K].TKEQVTnVGGAVVTGVTAVAQK.[T]	N7(Deamidated)	1	SYUA_HUMAN_P37840	SYUA_HUMAN_P37840	1	3	0.0592	0	1	1	720.066	2158.18	2158.17	5.3	0.00382	3.15821e+06	HCD (High Energy Collision Dissociation)	MS2	9.38912	60	24.8766	5836	20241018_FJ_VOLTA_MP_Easy15_45min_1891_DDA_200ng_1_241018150029.raw	F13	5.24	1
FALSE	High	Sequest HT (A2)	Unambiguous	[K].TKEQVTNVGGAVVTGVTAVAQK.[T]		1	SYUA_HUMAN_P37840	SYUA_HUMAN_P37840	1	3	0.7607	0	1	1	719.735	2157.19	2157.19	1.15	0.00083	1245829	HCD (High Energy Collision Dissociation)	MS2	2.1299	60	18.0629	5368	20241018_FJ_VOLTA_MP_Easy15_45min_1891_DDA_200ng_3.raw	F11	5.14	1
FALSE	High	Sequest HT (A2)	Unambiguous	[K].EqVTNVGGAVVTGVTAVAQK.[T]	Q2(Deamidated)	1	SYUA_HUMAN_P37840	SYUA_HUMAN_P37840	0	3	0.0311	0	1	1	643.685	1929.04	1929.03	5.59	0.00359	2.32572e+06	HCD (High Energy Collision Dissociation)	MS2	9.06538	60	23.4777	9107	20241018_FJ_VOLTA_MP_Easy15_45min_1891_DDA_200ng_11.raw	F3	5.14	1
FALSE	High	Sequest HT (A2)	Unambiguous	[K].EqVTNVGGAVVTGVTAVAqK.[T]	Q2(Deamidated); Q19(Deamidated)	1	SYUA_HUMAN_P37840	SYUA_HUMAN_P37840	0	3	0.6511	0	1	1	644.011	1930.02	1930.01	3.02	0.00194	3735360	HCD (High Energy Collision Dissociation)	MS2	1.86666	60	27.6755	7155	20241018_FJ_VOLTA_MP_Easy15_45min_1891_DDA_200ng_1_241018150029.raw	F13	5.13	1
FALSE	High	Sequest HT (A2)	Unambiguous	[K].TKEQVTNVGGAVVTGVTAVAQK.[T]		1	SYUA_HUMAN_P37840	SYUA_HUMAN_P37840	1	2	0.7207	0	1	1	1079.1	2157.18	2157.19	-2.07	-0.00223	48586712	HCD (High Energy Collision Dissociation)	MS2	8.15627	60	18.3963	6763	20241018_FJ_VOLTA_MP_Easy15_45min_1891_DDA_200ng_11.raw	F3	5.12	1
FALSE	High	Sequest HT (A2)	Unambiguous	[K].TKEqVTNVGGAVVTGVTAVAqK.[T]	Q4(Deamidated); Q21(Deamidated)	1	SYUA_HUMAN_P37840	SYUA_HUMAN_P37840	1	3	0.721	0	1	1	720.391	2159.16	2159.16	1.14	0.00082	2.64027e+06	HCD (High Energy Collision Dissociation)	MS2	1.1099	60	20.8557	6561	20241018_FJ_VOLTA_MP_Easy15_45min_1891_DDA_200ng_10.raw	F4	5.09	1
FALSE	High	Sequest HT (A2)	Unambiguous	[K].TKEQVTnVGGAVVTGVTAVAQK.[T]	N7(Deamidated)	1	SYUA_HUMAN_P37840	SYUA_HUMAN_P37840	1	3	0.0394	0	1	1	720.065	2158.18	2158.17	4.2	0.00302	4907370	HCD (High Energy Collision Dissociation)	MS2	6.22345	60	20.1917	7516	20241018_FJ_VOLTA_MP_Easy15_45min_1891_DDA_200ng_11.raw	F3	5.07	1
FALSE	High	Sequest HT (A2)	Unambiguous	[K].TKEGVVHGVATVAEK.[T]		1	SYUA_HUMAN_P37840	SYUA_HUMAN_P37840	1	2	0.7357	0	1	1	762.922	1524.84	1524.84	-1.1	-0.00084	4693978	HCD (High Energy Collision Dissociation)	MS2	0	60	6.3568	1320	20241018_FJ_VOLTA_MP_Easy15_45min_1891_DDA_200ng_7.raw	F7	5.07	1
FALSE	High	Sequest HT (A2)	Unambiguous	[K].TKEGVVHGVATVAEK.[T]		1	SYUA_HUMAN_P37840	SYUA_HUMAN_P37840	1	3	0.5913	0	1	1	508.953	1524.84	1524.84	3.79	0.00193	10496295	HCD (High Energy Collision Dissociation)	MS2	19.7301	60	6.79	1610	20241018_FJ_VOLTA_MP_Easy15_45min_1891_DDA_200ng_11.raw	F3	5.04	1
FALSE	High	Sequest HT (A2)	Unambiguous	[K].TKEQVTNVGGAVVTGVTAVAQK.[T]		1	SYUA_HUMAN_P37840	SYUA_HUMAN_P37840	1	4	0.7206	0	1	1	540.052	2157.19	2157.19	0.13	7e-05	1.24722e+06	HCD (High Energy Collision Dissociation)	MS2	0.610316	60	18.8065	5610	20241018_FJ_VOLTA_MP_Easy15_45min_1891_DDA_200ng_3.raw	F11	5.01	1
FALSE	High	Sequest HT (A2)	Unambiguous	[K].TVEGAGSIAAATGfVK.[K]	F14(Oxidation)	1	SYUA_HUMAN_P37840	SYUA_HUMAN_P37840	0	2	0.014	0	1	1	747.895	1494.78	1494.78	2.03	0.00152	8522257	HCD (High Energy Collision Dissociation)	MS2	0.436157	60	18.3791	6305	20241018_FJ_VOLTA_MP_Easy15_45min_1891_DDA_200ng_9.raw	F5	5	1
FALSE	High	Sequest HT (A2)	Unambiguous	[K].EQVTNVGGAVVTGVTAVAQK.[T]		1	SYUA_HUMAN_P37840	SYUA_HUMAN_P37840	0	2	0.8116	0	1	1	964.526	1928.04	1928.04	-0.19	-0.00019	2.7687e+06	HCD (High Energy Collision Dissociation)	MS2	0.899551	60	23.0731	6696	20241018_FJ_VOLTA_MP_Easy15_45min_1891_DDA_200ng_2.raw	F12	4.99	1
FALSE	High	Sequest HT (A2)	Unambiguous	[K].TVEGAGSIAAATGFVK.[K]		1	SYUA_HUMAN_P37840	SYUA_HUMAN_P37840	0	3	0.6994	0	1	1	493.6	1478.79	1478.78	1.04	0.00051	17821402	HCD (High Energy Collision Dissociation)	MS2	0.980684	60	21.0674	7446	20241018_FJ_VOLTA_MP_Easy15_45min_1891_DDA_200ng_9.raw	F5	4.99	1
FALSE	High	Sequest HT (A2)	Unambiguous	[K].TKEQVTnVGGAVVTGVTAVAQK.[T]	N7(Deamidated)	1	SYUA_HUMAN_P37840	SYUA_HUMAN_P37840	1	3	0.0542	0	1	1	720.063	2158.18	2158.17	1.91	0.00137	1.42746e+06	HCD (High Energy Collision Dissociation)	MS2	1.06604	60	20.6294	5143	20241018_FJ_VOLTA_MP_Easy15_45min_1891_DDA_200ng_13.raw	F1	4.98	1
FALSE	High	Sequest HT (A2)	Unambiguous	[K].EQVTnVGGAVVTGVTAVAQK.[T]	N5(Deamidated)	1	SYUA_HUMAN_P37840	SYUA_HUMAN_P37840	0	3		0.0311	2	2	643.685	1929.04	1929.03	5.59	0.00359	2.32572e+06	HCD (High Energy Collision Dissociation)	MS2	9.06538	60	23.4777	9107	20241018_FJ_VOLTA_MP_Easy15_45min_1891_DDA_200ng_11.raw	F3	4.98	1
FALSE	High	Sequest HT (A2)	Unambiguous	[K].TKEQVTnVGGAVVTGVTAVAQK.[T]	N7(Deamidated)	1	SYUA_HUMAN_P37840	SYUA_HUMAN_P37840	1	3	0.0684	0	1	1	720.064	2158.18	2158.17	2.59	0.00186	2.56422e+06	HCD (High Energy Collision Dissociation)	MS2	1.21476	60	19.9263	7454	20241018_FJ_VOLTA_MP_Easy15_45min_1891_DDA_200ng_12.raw	F2	4.97	1
FALSE	High	Sequest HT (A2)	Unambiguous	[K].TKEQVTNVGGAVVTGVTAvAQK.[T]	V19(Oxidation)	1	SYUA_HUMAN_P37840	SYUA_HUMAN_P37840	1	3	0.0342	0	1	1	725.063	2173.17	2173.18	-3.88	-0.00281	1166214	HCD (High Energy Collision Dissociation)	MS2	9.55269	60	14.7572	4816	20241018_FJ_VOLTA_MP_Easy15_45min_1891_DDA_200ng_9.raw	F5	4.97	1
FALSE	High	Sequest HT (A2)	Unambiguous	[K].TKEQVTNVGGAVVTGVTAVAQK.[T]		1	SYUA_HUMAN_P37840	SYUA_HUMAN_P37840	1	3	1	0	1	1	719.736	2157.19	2157.19	2.17	0.00156	1.56309e+06	HCD (High Energy Collision Dissociation)	MS2	2.19635	60	18.0283	6239	20241018_FJ_VOLTA_MP_Easy15_45min_1891_DDA_200ng_7.raw	F7	4.96	1
FALSE	High	Sequest HT (A2)	Unambiguous	[K].TVEGAGSIAAATGfVK.[K]	F14(Oxidation)	1	SYUA_HUMAN_P37840	SYUA_HUMAN_P37840	0	2	0.0181	0	1	1	747.895	1494.78	1494.78	2.44	0.00182	7.90251e+06	HCD (High Energy Collision Dissociation)	MS2	2.55175	60	23.5297	8524	20241018_FJ_VOLTA_MP_Easy15_45min_1891_DDA_200ng_9.raw	F5	4.96	1
FALSE	High	Sequest HT (A2)	Unambiguous	[K].TKEQVTnVGGAVVTGVTAVAQK.[T]	N7(Deamidated)	1	SYUA_HUMAN_P37840	SYUA_HUMAN_P37840	1	3	0.0567	0	1	1	720.066	2158.18	2158.17	4.96	0.00357	3.18989e+06	HCD (High Energy Collision Dissociation)	MS2	2.75314	60	23.2523	8994	20241018_FJ_VOLTA_MP_Easy15_45min_1891_DDA_200ng_11.raw	F3	4.94	1
FALSE	High	Sequest HT (A2)	Unambiguous	[K].TVEGAGSIAAATGFvK.[K]	V15(Oxidation)	1	SYUA_HUMAN_P37840	SYUA_HUMAN_P37840	0	2		0.014	2	2	747.895	1494.78	1494.78	2.03	0.00152	8522257	HCD (High Energy Collision Dissociation)	MS2	0.436157	60	18.3791	6305	20241018_FJ_VOLTA_MP_Easy15_45min_1891_DDA_200ng_9.raw	F5	4.93	1
FALSE	High	Sequest HT (A2)	Unambiguous	[K].EQVTNVGGAVVTGVTAVAqK.[T]	Q19(Deamidated)	1	SYUA_HUMAN_P37840	SYUA_HUMAN_P37840	0	2	0.6694	0	1	1	965.019	1929.03	1929.03	0.82	0.00079	1.3254e+06	HCD (High Energy Collision Dissociation)	MS2	0.578029	60	24.0697	8663	20241018_FJ_VOLTA_MP_Easy15_45min_1891_DDA_200ng_8.raw	F6	4.93	1
FALSE	High	Sequest HT (A2)	Unambiguous	[K].TKEqVTnVGGAVVTGVTAVAQK.[T]	Q4(Deamidated); N7(Deamidated)	1	SYUA_HUMAN_P37840	SYUA_HUMAN_P37840	1	3	0.4726	0	1	1	720.397	2159.18	2159.16	9.28	0.00668	6.76523e+06	HCD (High Energy Collision Dissociation)	MS2	19.8839	60	20.6962	7751	20241018_FJ_VOLTA_MP_Easy15_45min_1891_DDA_200ng_11.raw	F3	4.93	1
FALSE	High	Sequest HT (A2)	Unambiguous	[K].TKEQVTnVGGAVVTGVTAVAQK.[T]	N7(Deamidated)	1	SYUA_HUMAN_P37840	SYUA_HUMAN_P37840	1	3	0.053	0	1	1	720.064	2158.18	2158.17	2.16	0.00156	1.02122e+06	HCD (High Energy Collision Dissociation)	MS2	0.505114	60	20.3926	5963	20241018_FJ_VOLTA_MP_Easy15_45min_1891_DDA_200ng_4.raw	F10	4.91	1
FALSE	High	Sequest HT (A2)	Unambiguous	[K].TVEGAGSIAAATGFVK.[K]		1	SYUA_HUMAN_P37840	SYUA_HUMAN_P37840	0	2	0.7122	0	1	1	739.901	1478.79	1478.78	6.37	0.00471	71566800	HCD (High Energy Collision Dissociation)	MS2	0.517159	52.659	21.2442	8004	20241018_FJ_VOLTA_MP_Easy15_45min_1891_DDA_200ng_11.raw	F3	4.9	1
FALSE	High	Sequest HT (A2)	Unambiguous	[K].DQLGKnEEGAPQEGILEDmPVDPDNEAYEmPSEEGYQDYEPEA.[-]	N6(Deamidated); M19(Oxidation); M30(Oxidation)	1	SYUA_HUMAN_P37840	SYUA_HUMAN_P37840	1	3	0.0389	0	1	1	1621.01	4861.01	4860.99	3.02	0.00489	1.40528e+06	HCD (High Energy Collision Dissociation)	MS2	0	60	28.5368	11656	20241018_FJ_VOLTA_MP_Easy15_45min_1891_DDA_200ng_11.raw	F3	4.88	1
FALSE	High	Sequest HT (A2)	Unambiguous	[K].TKEqVTNVGGAVVTGVTAVAQK.[T]	Q4(Deamidated)	1	SYUA_HUMAN_P37840	SYUA_HUMAN_P37840	1	3		0.0394	2	2	720.065	2158.18	2158.17	4.2	0.00302	4907370	HCD (High Energy Collision Dissociation)	MS2	6.22345	60	20.1917	7516	20241018_FJ_VOLTA_MP_Easy15_45min_1891_DDA_200ng_11.raw	F3	4.87	1
FALSE	High	Sequest HT (A2)	Unambiguous	[K].TVEGAGSIAAATGFvK.[K]	V15(Oxidation)	1	SYUA_HUMAN_P37840	SYUA_HUMAN_P37840	0	2		0.0181	2	2	747.895	1494.78	1494.78	2.44	0.00182	7.90251e+06	HCD (High Energy Collision Dissociation)	MS2	2.55175	60	23.5297	8524	20241018_FJ_VOLTA_MP_Easy15_45min_1891_DDA_200ng_9.raw	F5	4.87	1
FALSE	High	Sequest HT (A2)	Unambiguous	[K].TKEQVTnVGGAVVTGVTAVAQK.[T]	N7(Deamidated)	1	SYUA_HUMAN_P37840	SYUA_HUMAN_P37840	1	3	0.0639	0	1	1	720.065	2158.18	2158.17	3.52	0.00253	1.5217e+06	HCD (High Energy Collision Dissociation)	MS2	3.94684	60	20.4388	7699	20241018_FJ_VOLTA_MP_Easy15_45min_1891_DDA_200ng_12.raw	F2	4.85	1
FALSE	High	Sequest HT (A2)	Unambiguous	[K].KDqLGKNEEGAPQEGILEDmPVDPDnEAYEmPSEEGYQDYEPEA.[-]	Q3(Deamidated); M20(Oxidation); N26(Deamidated); M31(Oxidation)	1	SYUA_HUMAN_P37840	SYUA_HUMAN_P37840	2	4	0.0062	0	1	1	1248.28	4990.09	4990.07	4.2	0.00523	1.77539e+06	HCD (High Energy Collision Dissociation)	MS2	2.03929	60	25.5335	10123	20241018_FJ_VOLTA_MP_Easy15_45min_1891_DDA_200ng_11.raw	F3	4.83	1
FALSE	High	Sequest HT (A2)	Unambiguous	[K].EQVTNVGGAVVTGVTAVAQK.[T]		1	SYUA_HUMAN_P37840	SYUA_HUMAN_P37840	0	2	0.7635	0	1	1	964.527	1928.05	1928.04	1.26	0.00122	2253505	HCD (High Energy Collision Dissociation)	MS2	0	60	26.0979	6419	20241018_FJ_VOLTA_MP_Easy15_45min_1891_DDA_200ng_1_241018150029.raw	F13	4.82	1
FALSE	High	Sequest HT (A2)	Unambiguous	[K].TKEQVTNVGGAVVTGVtAVAQK.[T]	T17(Oxidation)	1	SYUA_HUMAN_P37840	SYUA_HUMAN_P37840	1	3		0.0342	2	2	725.063	2173.17	2173.18	-3.88	-0.00281	1166214	HCD (High Energy Collision Dissociation)	MS2	9.55269	60	14.7572	4816	20241018_FJ_VOLTA_MP_Easy15_45min_1891_DDA_200ng_9.raw	F5	4.8	1
FALSE	High	Sequest HT (A2)	Unambiguous	[K].TVEGAGSIAAATGFVk.[K]	K16(Oxidation)	1	SYUA_HUMAN_P37840	SYUA_HUMAN_P37840	0	2		0.0323	3	3	747.895	1494.78	1494.78	2.44	0.00182	7.90251e+06	HCD (High Energy Collision Dissociation)	MS2	2.55175	60	23.5297	8524	20241018_FJ_VOLTA_MP_Easy15_45min_1891_DDA_200ng_9.raw	F5	4.8	1
FALSE	High	Sequest HT (A2)	Unambiguous	[K].KDqLGKNEEGAPqEGILEDmPVDPDNEAYEmPSEEGYQDYEPEA.[-]	Q3(Deamidated); Q13(Deamidated); M20(Oxidation); M31(Oxidation)	1	SYUA_HUMAN_P37840	SYUA_HUMAN_P37840	2	4		0.0062	2	2	1248.28	4990.09	4990.07	4.2	0.00523	1.77539e+06	HCD (High Energy Collision Dissociation)	MS2	2.03929	60	25.5335	10123	20241018_FJ_VOLTA_MP_Easy15_45min_1891_DDA_200ng_11.raw	F3	4.8	1
FALSE	High	Sequest HT (A2)	Unambiguous	[K].EGVVHGVATVAEK.[T]		1	SYUA_HUMAN_P37840	SYUA_HUMAN_P37840	0	3	0.4729	0	1	1	432.572	1295.7	1295.7	3.81	0.00164	3.93436e+06	HCD (High Energy Collision Dissociation)	MS2	8.84285	60	10.5665	3299	20241018_FJ_VOLTA_MP_Easy15_45min_1891_DDA_200ng_11.raw	F3	4.8	1
FALSE	High	Sequest HT (A2)	Unambiguous	[K].EQVTnVGGAVVTGVTAVAQK.[T]	N5(Deamidated)	1	SYUA_HUMAN_P37840	SYUA_HUMAN_P37840	0	3	0.0877	0	1	1	643.683	1929.03	1929.03	2.45	0.00158	2.16972e+06	HCD (High Energy Collision Dissociation)	MS2	1.87601	60	25.0232	7905	20241018_FJ_VOLTA_MP_Easy15_45min_1891_DDA_200ng_3.raw	F11	4.79	1
FALSE	High	Sequest HT (A2)	Unambiguous	[K].TVEGAGSIAAATGFVK.[K]		1	SYUA_HUMAN_P37840	SYUA_HUMAN_P37840	0	2	0.6946	0	1	1	739.899	1478.79	1478.78	4.56	0.00337	54661888	HCD (High Energy Collision Dissociation)	MS2	0.487771	60	21.1127	5297	20241018_FJ_VOLTA_MP_Easy15_45min_1891_DDA_200ng_13.raw	F1	4.78	1
FALSE	High	Sequest HT (A2)	Unambiguous	[K].TVEGAGSIAAATGFVK.[K]		1	SYUA_HUMAN_P37840	SYUA_HUMAN_P37840	0	2	0.7469	0	1	1	739.903	1478.8	1478.78	9.68	0.00715	88177088	HCD (High Energy Collision Dissociation)	MS2	0.571046	47.575	21.1385	7475	20241018_FJ_VOLTA_MP_Easy15_45min_1891_DDA_200ng_9.raw	F5	4.78	1
FALSE	High	Sequest HT (A2)	Unambiguous	[K].KDQLGKnEEGAPQEGILEDmPVDPDnEAYEmPSEEGYQDYEPEA.[-]	N7(Deamidated); M20(Oxidation); N26(Deamidated); M31(Oxidation)	1	SYUA_HUMAN_P37840	SYUA_HUMAN_P37840	2	4		0.0104	3	3	1248.28	4990.09	4990.07	4.2	0.00523	1.77539e+06	HCD (High Energy Collision Dissociation)	MS2	2.03929	60	25.5335	10123	20241018_FJ_VOLTA_MP_Easy15_45min_1891_DDA_200ng_11.raw	F3	4.78	1
FALSE	High	Sequest HT (A2)	Unambiguous	[K].TKEGVLYVGSKTK.[E]		1	SYUA_HUMAN_P37840	SYUA_HUMAN_P37840	2	3	0.5912	0	1	1	470.604	1409.8	1409.8	-0.79	-0.00037	1.23096e+06	HCD (High Energy Collision Dissociation)	MS2	3.93453	60	6.222	1249	20241018_FJ_VOLTA_MP_Easy15_45min_1891_DDA_200ng_7.raw	F7	4.77	1
FALSE	High	Sequest HT (A2)	Unambiguous	[K].TKEQVTNVGGAVVTGvTAVAQK.[T]	V16(Oxidation)	1	SYUA_HUMAN_P37840	SYUA_HUMAN_P37840	1	3		0.0423	3	3	725.063	2173.17	2173.18	-3.88	-0.00281	1166214	HCD (High Energy Collision Dissociation)	MS2	9.55269	60	14.7572	4816	20241018_FJ_VOLTA_MP_Easy15_45min_1891_DDA_200ng_9.raw	F5	4.76	1
FALSE	High	Sequest HT (A2)	Unambiguous	[K].TKEqVTNVGGAVVTGVTAVAqK.[T]	Q4(Deamidated); Q21(Deamidated)	1	SYUA_HUMAN_P37840	SYUA_HUMAN_P37840	1	3	1	0	1	1	720.39	2159.16	2159.16	0.72	0.00052	1.14035e+06	HCD (High Energy Collision Dissociation)	MS2	2.72343	60	21.133	5302	20241018_FJ_VOLTA_MP_Easy15_45min_1891_DDA_200ng_13.raw	F1	4.76	1
FALSE	High	Sequest HT (A2)	Unambiguous	[K].TVEGAGSIAAATGFVK.[K]		1	SYUA_HUMAN_P37840	SYUA_HUMAN_P37840	0	2	0.7474	0	1	1	739.902	1478.8	1478.78	8.02	0.00593	98823088	HCD (High Energy Collision Dissociation)	MS2	0.45853	39.329	21.0857	7514	20241018_FJ_VOLTA_MP_Easy15_45min_1891_DDA_200ng_7.raw	F7	4.75	1
FALSE	High	Sequest HT (A2)	Unambiguous	[K].TVEGAGSIAAATGFVK.[K]		1	SYUA_HUMAN_P37840	SYUA_HUMAN_P37840	0	2	0.7426	0	1	1	739.903	1478.8	1478.78	9.02	0.00667	160724336	HCD (High Energy Collision Dissociation)	MS2	0.460732	24.932	20.9546	7940	20241018_FJ_VOLTA_MP_Easy15_45min_1891_DDA_200ng_12.raw	F2	4.74	1
FALSE	High	Sequest HT (A2)	Unambiguous	[K].EGVVAAAEKTKQGVAEAAGK.[T]		1	SYUA_HUMAN_P37840	SYUA_HUMAN_P37840	2	3	0.678	0	1	1	638.679	1914.02	1914.03	-2.87	-0.00183	5.91251e+06	HCD (High Energy Collision Dissociation)	MS2	0	60	21.5658	4191	20241018_FJ_VOLTA_MP_Easy15_45min_1891_DDA_200ng_1_241018150029.raw	F13	4.72	1
FALSE	High	Sequest HT (A2)	Unambiguous	[K].EGVVAAAEKTKQGVAEAAGK.[T]		1	SYUA_HUMAN_P37840	SYUA_HUMAN_P37840	2	4	0.6645	0	1	1	479.262	1914.03	1914.03	-0.58	-0.00028	1.16244e+06	HCD (High Energy Collision Dissociation)	MS2	3.25678	60	21.5673	4192	20241018_FJ_VOLTA_MP_Easy15_45min_1891_DDA_200ng_1_241018150029.raw	F13	4.71	1
FALSE	High	Sequest HT (A2)	Unambiguous	[K].KDqLGKNEEGAPQEGILEDMPvDPDnEAyEMPSEEGYQDYEPEA.[-]	Q3(Deamidated); V22(Oxidation); N26(Deamidated); Y29(Oxidation)	1	SYUA_HUMAN_P37840	SYUA_HUMAN_P37840	2	4		0.0248	4	4	1248.28	4990.09	4990.07	4.2	0.00523	1.77539e+06	HCD (High Energy Collision Dissociation)	MS2	2.03929	60	25.5335	10123	20241018_FJ_VOLTA_MP_Easy15_45min_1891_DDA_200ng_11.raw	F3	4.71	1
FALSE	High	Sequest HT (A2)	Unambiguous	[K].TKEQVTNVGGAVVTGVTAVAQK.[T]		1	SYUA_HUMAN_P37840	SYUA_HUMAN_P37840	1	3	1	0	1	1	719.736	2157.19	2157.19	3.27	0.00235	1.67082e+06	HCD (High Energy Collision Dissociation)	MS2	3.0583	60	19.5384	6753	20241018_FJ_VOLTA_MP_Easy15_45min_1891_DDA_200ng_9.raw	F5	4.7	1
FALSE	High	Sequest HT (A2)	Unambiguous	[K].TKEQVTnVGGAVVTGVTAVAQK.[T]	N7(Deamidated)	1	SYUA_HUMAN_P37840	SYUA_HUMAN_P37840	1	4	0.1021	0	1	1	540.299	2158.17	2158.17	1.42	0.00077	1159647	HCD (High Energy Collision Dissociation)	MS2	0.804594	60	20.088	7067	20241018_FJ_VOLTA_MP_Easy15_45min_1891_DDA_200ng_7.raw	F7	4.7	1
FALSE	High	Sequest HT (A2)	Unambiguous	[K].EQVTNVGGAVVTGVTAVAqK.[T]	Q19(Deamidated)	1	SYUA_HUMAN_P37840	SYUA_HUMAN_P37840	0	2	0.4106	0	1	1	965.018	1929.03	1929.03	0.5	0.00048	1.9713e+06	HCD (High Energy Collision Dissociation)	MS2	0	60	24.0873	7072	20241018_FJ_VOLTA_MP_Easy15_45min_1891_DDA_200ng_2.raw	F12	4.7	1
FALSE	High	Sequest HT (A2)	Unambiguous	[K].EQVTNVGGAVVTGVTAVAqK.[T]	Q19(Deamidated)	1	SYUA_HUMAN_P37840	SYUA_HUMAN_P37840	0	3	1	0	1	1	643.681	1929.03	1929.03	-0.39	-0.00025	1.04953e+06	HCD (High Energy Collision Dissociation)	MS2	0.853162	60	24.0126	7666	20241018_FJ_VOLTA_MP_Easy15_45min_1891_DDA_200ng_10.raw	F4	4.69	1
FALSE	High	Sequest HT (A2)	Unambiguous	[K].EQVTnVGGAVVTGVTAVAQK.[T]	N5(Deamidated)	1	SYUA_HUMAN_P37840	SYUA_HUMAN_P37840	0	3	0.0448	0	1	1	643.683	1929.04	1929.03	3.4	0.00219	1.38992e+06	HCD (High Energy Collision Dissociation)	MS2	0.700792	60	24.9907	9314	20241018_FJ_VOLTA_MP_Easy15_45min_1891_DDA_200ng_7.raw	F7	4.69	1
FALSE	High	Sequest HT (A2)	Unambiguous	[K].DQLGKnEEGAPQEGILEDMpVDpDNEAYEMPSEEGYQDYEPEA.[-]	N6(Deamidated); P20(Oxidation); P23(Oxidation)	1	SYUA_HUMAN_P37840	SYUA_HUMAN_P37840	1	3		0.0389	2	2	1621.01	4861.01	4860.99	3.02	0.00489	1.40528e+06	HCD (High Energy Collision Dissociation)	MS2	0	60	28.5368	11656	20241018_FJ_VOLTA_MP_Easy15_45min_1891_DDA_200ng_11.raw	F3	4.69	1
FALSE	High	Sequest HT (A2)	Unambiguous	[K].TVEGAGSIAAATGFVK.[K]		1	SYUA_HUMAN_P37840	SYUA_HUMAN_P37840	0	2	0.7735	0	1	1	739.896	1478.78	1478.78	-0.07	-5e-05	8622175	HCD (High Energy Collision Dissociation)	MS2	3.26784	60	20.9913	6000	20241018_FJ_VOLTA_MP_Easy15_45min_1891_DDA_200ng_2.raw	F12	4.68	1
FALSE	High	Sequest HT (A2)	Unambiguous	[K].DQLGKnEEGAPQEGILEDMPvDPDNEAyEMPSEEGYQDYEPEA.[-]	N6(Deamidated); V21(Oxidation); Y28(Oxidation)	1	SYUA_HUMAN_P37840	SYUA_HUMAN_P37840	1	3		0.041	3	3	1621.01	4861.01	4860.99	3.02	0.00489	1.40528e+06	HCD (High Energy Collision Dissociation)	MS2	0	60	28.5368	11656	20241018_FJ_VOLTA_MP_Easy15_45min_1891_DDA_200ng_11.raw	F3	4.68	1
FALSE	High	Sequest HT (A2)	Unambiguous	[K].TVEGAGSIAAATGFVK.[K]		1	SYUA_HUMAN_P37840	SYUA_HUMAN_P37840	0	2	0.7366	0	1	1	739.898	1478.79	1478.78	2.33	0.00172	6996364	HCD (High Energy Collision Dissociation)	MS2	1.98104	60	21.6422	7694	20241018_FJ_VOLTA_MP_Easy15_45min_1891_DDA_200ng_9.raw	F5	4.67	1
FALSE	High	Sequest HT (A2)	Unambiguous	[K].EqVTNVGGAVVTGVTAVAqK.[T]	Q2(Deamidated); Q19(Deamidated)	1	SYUA_HUMAN_P37840	SYUA_HUMAN_P37840	0	3	0.7409	0	1	1	644.01	1930.02	1930.01	1.88	0.00121	2.94771e+06	HCD (High Energy Collision Dissociation)	MS2	1.09561	60	26.3047	9717	20241018_FJ_VOLTA_MP_Easy15_45min_1891_DDA_200ng_9.raw	F5	4.67	1
FALSE	High	Sequest HT (A2)	Unambiguous	[K].TKEQVTnVGGAVVTGVTAVAQK.[T]	N7(Deamidated)	1	SYUA_HUMAN_P37840	SYUA_HUMAN_P37840	1	3	0.0987	0	1	1	720.064	2158.18	2158.17	2.5	0.0018	1.82452e+06	HCD (High Energy Collision Dissociation)	MS2	1.40829	60	20.1217	5022	20241018_FJ_VOLTA_MP_Easy15_45min_1891_DDA_200ng_13.raw	F1	4.66	1
FALSE	High	Sequest HT (A2)	Unambiguous	[K].KDQLGKnEEGAPQEGILEDMPvDPDnEAyEMPSEEGYQDYEPEA.[-]	N7(Deamidated); V22(Oxidation); N26(Deamidated); Y29(Oxidation)	1	SYUA_HUMAN_P37840	SYUA_HUMAN_P37840	2	4		0.0352	5	5	1248.28	4990.09	4990.07	4.2	0.00523	1.77539e+06	HCD (High Energy Collision Dissociation)	MS2	2.03929	60	25.5335	10123	20241018_FJ_VOLTA_MP_Easy15_45min_1891_DDA_200ng_11.raw	F3	4.66	1
FALSE	High	Sequest HT (A2)	Unambiguous	[K].TKEQVTnVGGAVVTGVTAVAQK.[T]	N7(Deamidated)	1	SYUA_HUMAN_P37840	SYUA_HUMAN_P37840	1	3	0.0452	0	1	1	720.063	2158.18	2158.17	1.74	0.00125	890457	HCD (High Energy Collision Dissociation)	MS2	0	60	23.4322	7302	20241018_FJ_VOLTA_MP_Easy15_45min_1891_DDA_200ng_3.raw	F11	4.65	1
FALSE	High	Sequest HT (A2)	Unambiguous	[K].EQVTNVGGAVVTGVTAVAQK.[T]		1	SYUA_HUMAN_P37840	SYUA_HUMAN_P37840	0	2	0.729	0	1	1	964.526	1928.04	1928.04	-0.13	-0.00012	1.26559e+06	HCD (High Energy Collision Dissociation)	MS2	0	60	26.6139	6643	20241018_FJ_VOLTA_MP_Easy15_45min_1891_DDA_200ng_1_241018150029.raw	F13	4.65	1
FALSE	High	Sequest HT (A2)	Unambiguous	[K].DqLGKNEEGAPQEGILEDmPVDPDnEAYEmPSEEGYQDYEPEA.[-]	Q2(Deamidated); M19(Oxidation); N25(Deamidated); M30(Oxidation)	1	SYUA_HUMAN_P37840	SYUA_HUMAN_P37840	1	4	0.0194	0	1	1	1216.25	4862	4861.98	3.85	0.00468	2.08288e+06	HCD (High Energy Collision Dissociation)	MS2	1.45513	60	28.683	11733	20241018_FJ_VOLTA_MP_Easy15_45min_1891_DDA_200ng_11.raw	F3	4.63	1
FALSE	High	Sequest HT (A2)	Unambiguous	[K].TVEGAGSIAAATGFVK.[K]		1	SYUA_HUMAN_P37840	SYUA_HUMAN_P37840	0	2	0.7186	0	1	1	739.899	1478.79	1478.78	4.06	0.003	10964167	HCD (High Energy Collision Dissociation)	MS2	1.02424	60	21.7527	8254	20241018_FJ_VOLTA_MP_Easy15_45min_1891_DDA_200ng_11.raw	F3	4.62	1
FALSE	High	Sequest HT (A2)	Unambiguous	[K].EQVTNVGGAVVTGVTAVAqK.[T]	Q19(Deamidated)	1	SYUA_HUMAN_P37840	SYUA_HUMAN_P37840	0	2	0.6147	0	1	1	965.019	1929.03	1929.03	1.2	0.00115	1.25823e+06	HCD (High Energy Collision Dissociation)	MS2	0	60	27.1294	6884	20241018_FJ_VOLTA_MP_Easy15_45min_1891_DDA_200ng_1_241018150029.raw	F13	4.62	1
FALSE	High	Sequest HT (A2)	Unambiguous	[K].TVEGAGSIAAATGFVK.[K]		1	SYUA_HUMAN_P37840	SYUA_HUMAN_P37840	0	3	0.7217	0	1	1	493.601	1478.79	1478.78	3.02	0.00149	6209372	HCD (High Energy Collision Dissociation)	MS2	5.65576	60	21.2552	8008	20241018_FJ_VOLTA_MP_Easy15_45min_1891_DDA_200ng_11.raw	F3	4.6	1
FALSE	High	Sequest HT (A2)	Unambiguous	[K].EGVSKDDAEALKK.[A]		2	C5A0S6	C5A0S6; B7MRB2	2	3	0.5153	0	1	1	463.913	1389.73	1389.72	2.8	0.0013	5993821	HCD (High Energy Collision Dissociation)	MS2	2.77138	60	6.1858	1096	20241018_FJ_VOLTA_MP_Easy15_45min_1891_DDA_200ng_5.raw	F9	4.58	1
FALSE	High	Sequest HT (A2)	Unambiguous	[K].TKEQVTnVGGAVVTGVTAVAQK.[T]	N7(Deamidated)	1	SYUA_HUMAN_P37840	SYUA_HUMAN_P37840	1	3	0.0263	0	1	1	720.063	2158.18	2158.17	1.91	0.00137	1.28434e+06	HCD (High Energy Collision Dissociation)	MS2	0.654746	60	20.3419	6388	20241018_FJ_VOLTA_MP_Easy15_45min_1891_DDA_200ng_10.raw	F4	4.57	1
FALSE	High	Sequest HT (A2)	Unambiguous	[K].EQVTNVGGAVVTGVTAVAqK.[T]	Q19(Deamidated)	1	SYUA_HUMAN_P37840	SYUA_HUMAN_P37840	0	3	0.3523	0	1	1	643.682	1929.03	1929.03	1.41	0.00091	1.72681e+06	HCD (High Energy Collision Dissociation)	MS2	1.24486	60	23.9504	8611	20241018_FJ_VOLTA_MP_Easy15_45min_1891_DDA_200ng_8.raw	F6	4.57	1
FALSE	High	Sequest HT (A2)	Unambiguous	[K].TKEGVVHGVATVAEK.[T]		1	SYUA_HUMAN_P37840	SYUA_HUMAN_P37840	1	2	0.744	0	1	1	762.922	1524.84	1524.84	-0.94	-0.00072	2.74799e+06	HCD (High Energy Collision Dissociation)	MS2	0	60	6.3964	1403	20241018_FJ_VOLTA_MP_Easy15_45min_1891_DDA_200ng_12.raw	F2	4.57	1
FALSE	High	Sequest HT (A2)	Unambiguous	[K].TVEGAGSIAAATGFVK.[K]		1	SYUA_HUMAN_P37840	SYUA_HUMAN_P37840	0	3	0.6908	0	1	1	493.6	1478.79	1478.78	0.67	0.00033	9773515	HCD (High Energy Collision Dissociation)	MS2	1.96786	60	25.9769	6360	20241018_FJ_VOLTA_MP_Easy15_45min_1891_DDA_200ng_1_241018150029.raw	F13	4.56	1
FALSE	High	Sequest HT (A2)	Unambiguous	[K].TKEQVTNVGGAVVTGVTAVAQK.[T]		1	SYUA_HUMAN_P37840	SYUA_HUMAN_P37840	1	3	1	0	1	1	719.735	2157.19	2157.19	2	0.00144	1.51356e+06	HCD (High Energy Collision Dissociation)	MS2	6.47422	60	14.7107	4884	20241018_FJ_VOLTA_MP_Easy15_45min_1891_DDA_200ng_7.raw	F7	4.56	1
FALSE	High	Sequest HT (A2)	Unambiguous	[K].TVEGAGSIAAATGFVK.[K]		1	SYUA_HUMAN_P37840	SYUA_HUMAN_P37840	0	2	0.7473	0	1	1	739.899	1478.79	1478.78	3.32	0.00245	35141216	HCD (High Energy Collision Dissociation)	MS2	0.883373	60	21.271	7530	20241018_FJ_VOLTA_MP_Easy15_45min_1891_DDA_200ng_9.raw	F5	4.55	1
FALSE	High	Sequest HT (A2)	Unambiguous	[K].EqVTNVGGAVVTGVTAVAQK.[T]	Q2(Deamidated)	1	SYUA_HUMAN_P37840	SYUA_HUMAN_P37840	0	3	0.0879	0	1	1	643.682	1929.03	1929.03	1.79	0.00115	1.16918e+06	HCD (High Energy Collision Dissociation)	MS2	1.06596	60	23.8753	6995	20241018_FJ_VOLTA_MP_Easy15_45min_1891_DDA_200ng_2.raw	F12	4.55	1
FALSE	High	Sequest HT (A2)	Unambiguous	[K].TVEGAGSIAAATGFVK.[K]		1	SYUA_HUMAN_P37840	SYUA_HUMAN_P37840	0	2	0.7181	0	1	1	739.899	1478.79	1478.78	3.9	0.00288	109243944	HCD (High Energy Collision Dissociation)	MS2	0.443296	28.453	21.1699	6430	20241018_FJ_VOLTA_MP_Easy15_45min_1891_DDA_200ng_3.raw	F11	4.54	1
FALSE	High	Sequest HT (A2)	Unambiguous	[K].EGVVHGVATVAEK.[T]		1	SYUA_HUMAN_P37840	SYUA_HUMAN_P37840	0	2	0.315	0	1	1	648.351	1295.69	1295.7	-0.97	-0.00063	170378624	HCD (High Energy Collision Dissociation)	MS2	0.641096	19.737	7.6359	1918	20241018_FJ_VOLTA_MP_Easy15_45min_1891_DDA_200ng_7.raw	F7	4.54	1
FALSE	High	Sequest HT (A2)	Unambiguous	[K].TKEGVVHGVATVAEK.[T]		1	SYUA_HUMAN_P37840	SYUA_HUMAN_P37840	1	3	0.522	0	1	1	508.952	1524.84	1524.84	1.45	0.00074	2.45686e+06	HCD (High Energy Collision Dissociation)	MS2	3.23466	60	20.9697	3885	20241018_FJ_VOLTA_MP_Easy15_45min_1891_DDA_200ng_1_241018150029.raw	F13	4.54	1
FALSE	High	Sequest HT (A2)	Unambiguous	[K].DQLGKnEEGAPQEGILEDmPVDPDnEAYEmPSEEGYQDYEPEA.[-]	N6(Deamidated); M19(Oxidation); N25(Deamidated); M30(Oxidation)	1	SYUA_HUMAN_P37840	SYUA_HUMAN_P37840	1	4		0.0194	2	2	1216.25	4862	4861.98	3.85	0.00468	2.08288e+06	HCD (High Energy Collision Dissociation)	MS2	1.45513	60	28.683	11733	20241018_FJ_VOLTA_MP_Easy15_45min_1891_DDA_200ng_11.raw	F3	4.54	1
FALSE	High	Sequest HT (A2)	Unambiguous	[K].EQVTnVGGAVVTGVTAVAQK.[T]	N5(Deamidated)	1	SYUA_HUMAN_P37840	SYUA_HUMAN_P37840	0	2	0.1722	0	1	1	965.019	1929.03	1929.03	1.45	0.0014	765926	HCD (High Energy Collision Dissociation)	MS2	0	60	25.0647	7918	20241018_FJ_VOLTA_MP_Easy15_45min_1891_DDA_200ng_3.raw	F11	4.53	1
FALSE	High	Sequest HT (A2)	Unambiguous	[K].TKEGVVHGVATVAEK.[T]		1	SYUA_HUMAN_P37840	SYUA_HUMAN_P37840	1	4	0.5133	0	1	1	381.965	1524.84	1524.84	0	0	685168	HCD (High Energy Collision Dissociation)	MS2	71.4405	60	6.3836	1397	20241018_FJ_VOLTA_MP_Easy15_45min_1891_DDA_200ng_12.raw	F2	4.52	1
FALSE	High	Sequest HT (A2)	Unambiguous	[K].TKEqVTNVGGAVVTGVTAVAqK.[T]	Q4(Deamidated); Q21(Deamidated)	1	SYUA_HUMAN_P37840	SYUA_HUMAN_P37840	1	3	0.5965	0	1	1	720.391	2159.16	2159.16	0.97	0.0007	919936	HCD (High Energy Collision Dissociation)	MS2	6.23469	60	21.0631	7504	20241018_FJ_VOLTA_MP_Easy15_45min_1891_DDA_200ng_7.raw	F7	4.51	1
FALSE	High	Sequest HT (A2)	Unambiguous	[K].DqLGKNEEGAPQEGILeDMPVDPDneAYEMPSEEGYQDYEPEA.[-]	Q2(Deamidated); E17(Oxidation); N25(Deamidated); E26(Oxidation)	1	SYUA_HUMAN_P37840	SYUA_HUMAN_P37840	1	4		0.0302	3	3	1216.25	4862	4861.98	3.85	0.00468	2.08288e+06	HCD (High Energy Collision Dissociation)	MS2	1.45513	60	28.683	11733	20241018_FJ_VOLTA_MP_Easy15_45min_1891_DDA_200ng_11.raw	F3	4.49	1
FALSE	High	Sequest HT (A2)	Unambiguous	[K].TVEGAGSIAAATGFVK.[K]		1	SYUA_HUMAN_P37840	SYUA_HUMAN_P37840	0	2	0.6971	0	1	1	739.898	1478.79	1478.78	2.58	0.0019	1.98566e+06	HCD (High Energy Collision Dissociation)	MS2	0	60	21.5897	7736	20241018_FJ_VOLTA_MP_Easy15_45min_1891_DDA_200ng_7.raw	F7	4.49	1
FALSE	High	Sequest HT (A2)	Unambiguous	[K].EqVTNVGGAVVTGVTAVAQK.[T]	Q2(Deamidated)	1	SYUA_HUMAN_P37840	SYUA_HUMAN_P37840	0	3		0.0448	2	2	643.683	1929.04	1929.03	3.4	0.00219	1.38992e+06	HCD (High Energy Collision Dissociation)	MS2	0.700792	60	24.9907	9314	20241018_FJ_VOLTA_MP_Easy15_45min_1891_DDA_200ng_7.raw	F7	4.48	1
FALSE	High	Sequest HT (A2)	Unambiguous	[K].TKEqVTNVGGAVVTGVTAVAqK.[T]	Q4(Deamidated); Q21(Deamidated)	1	SYUA_HUMAN_P37840	SYUA_HUMAN_P37840	1	3	0.7025	0	1	1	720.391	2159.16	2159.16	1.31	0.00094	1.13958e+06	HCD (High Energy Collision Dissociation)	MS2	1.90755	60	21.7633	6250	20241018_FJ_VOLTA_MP_Easy15_45min_1891_DDA_200ng_2.raw	F12	4.47	1
FALSE	High	Sequest HT (A2)	Unambiguous	[K].TKEGVVHGVATVAEK.[T]		1	SYUA_HUMAN_P37840	SYUA_HUMAN_P37840	1	4	0.5011	0	1	1	381.964	1524.84	1524.84	-1.28	-0.00049	2.30579e+06	HCD (High Energy Collision Dissociation)	MS2	0.851584	60	6.3978	1250	20241018_FJ_VOLTA_MP_Easy15_45min_1891_DDA_200ng_13.raw	F1	4.47	1
FALSE	High	Sequest HT (A2)	Unambiguous	[K].EGVVHGVATVAEK.[T]		1	SYUA_HUMAN_P37840	SYUA_HUMAN_P37840	0	2	0.3049	0	1	1	648.351	1295.69	1295.7	-0.31	-0.0002	24860848	HCD (High Energy Collision Dissociation)	MS2	0.482379	60	7.7885	1771	20241018_FJ_VOLTA_MP_Easy15_45min_1891_DDA_200ng_3.raw	F11	4.46	1
FALSE	High	Sequest HT (A2)	Unambiguous	[K].TKEqVTNVGGAVVTGVTAVAQK.[T]	Q4(Deamidated)	1	SYUA_HUMAN_P37840	SYUA_HUMAN_P37840	1	3		0.0263	2	2	720.063	2158.18	2158.17	1.91	0.00137	1.28434e+06	HCD (High Energy Collision Dissociation)	MS2	0.654746	60	20.3419	6388	20241018_FJ_VOLTA_MP_Easy15_45min_1891_DDA_200ng_10.raw	F4	4.45	1
FALSE	High	Sequest HT (A2)	Unambiguous	[K].TKEqVTNVGGAVVTGVTAVAQK.[T]	Q4(Deamidated)	1	SYUA_HUMAN_P37840	SYUA_HUMAN_P37840	1	3		0.0452	2	2	720.063	2158.18	2158.17	1.74	0.00125	890457	HCD (High Energy Collision Dissociation)	MS2	0	60	23.4322	7302	20241018_FJ_VOLTA_MP_Easy15_45min_1891_DDA_200ng_3.raw	F11	4.44	1
FALSE	High	Sequest HT (A2)	Unambiguous	[K].AKEGVVAAAEK.[T]		1	SYUA_HUMAN_P37840	SYUA_HUMAN_P37840	1	3	0.5869	0	1	1	358.205	1072.6	1072.6	-0.11	-4e-05	23421290	HCD (High Energy Collision Dissociation)	MS2	3.17207	49.274	6.1495	1051	20241018_FJ_VOLTA_MP_Easy15_45min_1891_DDA_200ng_2.raw	F12	4.43	1
FALSE	High	Sequest HT (A2)	Unambiguous	[K].EGVVHGVATVAEK.[T]		1	SYUA_HUMAN_P37840	SYUA_HUMAN_P37840	0	2	0.3138	0	1	1	648.351	1295.69	1295.7	-0.87	-0.00056	41287188	HCD (High Energy Collision Dissociation)	MS2	0.500654	60	7.8375	1893	20241018_FJ_VOLTA_MP_Easy15_45min_1891_DDA_200ng_9.raw	F5	4.43	1
FALSE	High	Sequest HT (A2)	Unambiguous	[K].TKEGVVHGVATVAEK.[T]		1	SYUA_HUMAN_P37840	SYUA_HUMAN_P37840	1	2	0.7873	0	1	1	762.92	1524.83	1524.84	-3.26	-0.00249	1.07728e+06	HCD (High Energy Collision Dissociation)	MS2	0	60	6.4431	1261	20241018_FJ_VOLTA_MP_Easy15_45min_1891_DDA_200ng_9.raw	F5	4.42	1
FALSE	High	Sequest HT (A2)	Unambiguous	[K].TKEQVTNVGGAVVTGVTAVAQK.[T]		1	SYUA_HUMAN_P37840	SYUA_HUMAN_P37840	1	3	0.7262	0	1	1	719.736	2157.19	2157.19	3.27	0.00235	765038	HCD (High Energy Collision Dissociation)	MS2	2.85265	60	23.8654	5328	20241018_FJ_VOLTA_MP_Easy15_45min_1891_DDA_200ng_1_241018150029.raw	F13	4.42	1
FALSE	High	Sequest HT (A2)	Unambiguous	[K].DQLGKnEEGAPQEGILeDMPVDPDneAYEMPSEEGYQDYEPEA.[-]	N6(Deamidated); E17(Oxidation); N25(Deamidated); E26(Oxidation)	1	SYUA_HUMAN_P37840	SYUA_HUMAN_P37840	1	4		0.0497	4	4	1216.25	4862	4861.98	3.85	0.00468	2.08288e+06	HCD (High Energy Collision Dissociation)	MS2	1.45513	60	28.683	11733	20241018_FJ_VOLTA_MP_Easy15_45min_1891_DDA_200ng_11.raw	F3	4.4	1
FALSE	High	Sequest HT (A2)	Unambiguous	[K].TKEQVTNVGGAVVTGVTAVAqK.[T]	Q21(Deamidated)	1	SYUA_HUMAN_P37840	SYUA_HUMAN_P37840	1	4	0.2374	0	1	1	540.299	2158.18	2158.17	2.22	0.0012	1.16597e+06	HCD (High Energy Collision Dissociation)	MS2	2.41086	60	20.0158	6970	20241018_FJ_VOLTA_MP_Easy15_45min_1891_DDA_200ng_9.raw	F5	4.38	1
FALSE	High	Sequest HT (A2)	Unambiguous	[K].EQVTnVGGAVVTGVTAVAQK.[T]	N5(Deamidated)	1	SYUA_HUMAN_P37840	SYUA_HUMAN_P37840	0	2	0.2064	0	1	1	965.02	1929.03	1929.03	1.64	0.00158	433720	HCD (High Energy Collision Dissociation)	MS2	0	60	25.1011	7423	20241018_FJ_VOLTA_MP_Easy15_45min_1891_DDA_200ng_2.raw	F12	4.36	1
FALSE	High	Sequest HT (A2)	Unambiguous	[K].TKEqVTNVGGAVVTGVTAVAqK.[T]	Q4(Deamidated); Q21(Deamidated)	1	SYUA_HUMAN_P37840	SYUA_HUMAN_P37840	1	3	0.3693	0	1	1	720.393	2159.16	2159.16	3.86	0.00278	1.36467e+06	HCD (High Energy Collision Dissociation)	MS2	9.20761	60	21.5735	7728	20241018_FJ_VOLTA_MP_Easy15_45min_1891_DDA_200ng_7.raw	F7	4.36	1
FALSE	High	Sequest HT (A2)	Unambiguous	[K].TVEGAGSIAAATGFVK.[K]		1	SYUA_HUMAN_P37840	SYUA_HUMAN_P37840	0	2	0.7218	0	1	1	739.897	1478.79	1478.78	0.6	0.00044	3.31041e+06	HCD (High Energy Collision Dissociation)	MS2	0.858508	60	20.0376	6037	20241018_FJ_VOLTA_MP_Easy15_45min_1891_DDA_200ng_3.raw	F11	4.35	1
FALSE	High	Sequest HT (A2)	Unambiguous	[K].TKEQVTNVGGAVVTGVTAVAQK.[T]		1	SYUA_HUMAN_P37840	SYUA_HUMAN_P37840	1	4	1	0	1	1	540.054	2157.19	2157.19	2.5	0.00135	703516	HCD (High Energy Collision Dissociation)	MS2	1.73125	60	18.9961	6551	20241018_FJ_VOLTA_MP_Easy15_45min_1891_DDA_200ng_9.raw	F5	4.34	1
FALSE	High	Sequest HT (A2)	Unambiguous	[K].TKEqVTNVGGAVVTGVTAVAqK.[T]	Q4(Deamidated); Q21(Deamidated)	1	SYUA_HUMAN_P37840	SYUA_HUMAN_P37840	1	3	0.6605	0	1	1	720.39	2159.16	2159.16	-0.04	-3e-05	1.33976e+06	HCD (High Energy Collision Dissociation)	MS2	1.46738	60	21.2566	6093	20241018_FJ_VOLTA_MP_Easy15_45min_1891_DDA_200ng_2.raw	F12	4.33	1
FALSE	High	Sequest HT (A2)	Unambiguous	[K].AKEGVVAAAEK.[T]		1	SYUA_HUMAN_P37840	SYUA_HUMAN_P37840	1	3	0.5532	0	1	1	358.205	1072.6	1072.6	1.6	0.00057	595815552	HCD (High Energy Collision Dissociation)	MS2	2.62529	3.351	6.1626	1113	20241018_FJ_VOLTA_MP_Easy15_45min_1891_DDA_200ng_9.raw	F5	4.32	1
FALSE	High	Sequest HT (A2)	Unambiguous	[K].TVEGAGSIAAATGFVK.[K]		1	SYUA_HUMAN_P37840	SYUA_HUMAN_P37840	0	2	0.7262	0	1	1	739.899	1478.79	1478.78	4.56	0.00337	16849238	HCD (High Energy Collision Dissociation)	MS2	1.6541	60	21.5775	8166	20241018_FJ_VOLTA_MP_Easy15_45min_1891_DDA_200ng_11.raw	F3	4.31	1
FALSE	High	Sequest HT (A2)	Unambiguous	[K].EGVVHGVATVAEK.[T]		1	SYUA_HUMAN_P37840	SYUA_HUMAN_P37840	0	2	0.3767	0	1	1	648.351	1295.69	1295.7	-0.87	-0.00056	57629540	HCD (High Energy Collision Dissociation)	MS2	0.424987	54.06	7.762	2072	20241018_FJ_VOLTA_MP_Easy15_45min_1891_DDA_200ng_11.raw	F3	4.3	1
FALSE	High	Sequest HT (A2)	Unambiguous	[K].TVEGAGSiAAATGFVK.[K]	I8(Oxidation)	1	SYUA_HUMAN_P37840	SYUA_HUMAN_P37840	0	2	0.0419	0	1	1	747.894	1494.78	1494.78	1.13	0.00085	1.00803e+06	HCD (High Energy Collision Dissociation)	MS2	0	60	14.6569	4766	20241018_FJ_VOLTA_MP_Easy15_45min_1891_DDA_200ng_9.raw	F5	4.3	1
FALSE	High	Sequest HT (A2)	Unambiguous	[K].EQVTNVGGAVVTGVTAVAqK.[T]	Q19(Deamidated)	1	SYUA_HUMAN_P37840	SYUA_HUMAN_P37840	0	2	0.7442	0	1	1	965.018	1929.03	1929.03	0.25	0.00024	786620	HCD (High Energy Collision Dissociation)	MS2	0.724942	60	24.1057	6154	20241018_FJ_VOLTA_MP_Easy15_45min_1891_DDA_200ng_13.raw	F1	4.3	1
FALSE	High	Sequest HT (A2)	Unambiguous	[K].EGVVHGVATVAEK.[T]		1	SYUA_HUMAN_P37840	SYUA_HUMAN_P37840	0	2	0.3427	0	1	1	648.352	1295.7	1295.7	0.92	0.00059	3361497	HCD (High Energy Collision Dissociation)	MS2	0.241083	60	7.9921	1819	20241018_FJ_VOLTA_MP_Easy15_45min_1891_DDA_200ng_4.raw	F10	4.29	1
FALSE	High	Sequest HT (A2)	Unambiguous	[K].EGVVHGVATVAEK.[T]		1	SYUA_HUMAN_P37840	SYUA_HUMAN_P37840	0	2	0.3411	0	1	1	648.353	1295.7	1295.7	2.52	0.00163	3.54202e+06	HCD (High Energy Collision Dissociation)	MS2	5.8383	60	8.2809	2291	20241018_FJ_VOLTA_MP_Easy15_45min_1891_DDA_200ng_11.raw	F3	4.28	1
FALSE	High	Sequest HT (A2)	Unambiguous	[K].TKEGVLYVGSKTK.[E]		1	SYUA_HUMAN_P37840	SYUA_HUMAN_P37840	2	3	0.5958	0	1	1	470.605	1409.8	1409.8	0.96	0.00045	906717	HCD (High Energy Collision Dissociation)	MS2	2.4055	60	20.9504	3875	20241018_FJ_VOLTA_MP_Easy15_45min_1891_DDA_200ng_1_241018150029.raw	F13	4.28	1
FALSE	High	Sequest HT (A2)	Unambiguous	[K].TKEqVTnVGGAVVTGVTAVAqK.[T]	Q4(Deamidated); N7(Deamidated); Q21(Deamidated)	1	SYUA_HUMAN_P37840	SYUA_HUMAN_P37840	1	3	0.63	0	1	1	720.719	2160.14	2160.14	1.99	0.00143	1098905	HCD (High Energy Collision Dissociation)	MS2	2.04113	60	22.6366	6973	20241018_FJ_VOLTA_MP_Easy15_45min_1891_DDA_200ng_3.raw	F11	4.27	1
FALSE	High	Sequest HT (A2)	Unambiguous	[K].TVEGAGSIAAATGFVK.[K]		1	SYUA_HUMAN_P37840	SYUA_HUMAN_P37840	0	2	0.6972	0	1	1	739.897	1478.79	1478.78	1.42	0.00105	11012111	HCD (High Energy Collision Dissociation)	MS2	0.478275	60	19.862	6968	20241018_FJ_VOLTA_MP_Easy15_45min_1891_DDA_200ng_7.raw	F7	4.26	1
FALSE	High	Sequest HT (A2)	Unambiguous	[K].TVEGAGSIAAATGfVK.[K]	F14(Oxidation)	1	SYUA_HUMAN_P37840	SYUA_HUMAN_P37840	0	2	0.0189	0	1	1	747.896	1494.79	1494.78	3.83	0.00286	2.01226e+06	HCD (High Energy Collision Dissociation)	MS2	28.3197	60	23.2539	8995	20241018_FJ_VOLTA_MP_Easy15_45min_1891_DDA_200ng_11.raw	F3	4.24	1
FALSE	High	Sequest HT (A2)	Unambiguous	[K].EqVTnVGGAVVTGVTAVAQK.[T]	Q2(Deamidated); N5(Deamidated)	1	SYUA_HUMAN_P37840	SYUA_HUMAN_P37840	0	2	0.6147	0	1	1	965.513	1930.02	1930.01	2.77	0.00268	971490	HCD (High Energy Collision Dissociation)	MS2	4.1807	60	27.6352	7134	20241018_FJ_VOLTA_MP_Easy15_45min_1891_DDA_200ng_1_241018150029.raw	F13	4.23	1
FALSE	High	Sequest HT (A2)	Unambiguous	[K].EQVTNVGGAVVTGVTAVAQK.[T]		1	SYUA_HUMAN_P37840	SYUA_HUMAN_P37840	0	3	0.7376	0	1	1	643.354	1928.05	1928.04	1.79	0.00115	846114	HCD (High Energy Collision Dissociation)	MS2	7.86397	60	23.2445	8399	20241018_FJ_VOLTA_MP_Easy15_45min_1891_DDA_200ng_9.raw	F5	4.23	1
FALSE	High	Sequest HT (A2)	Unambiguous	[K].TVEGAGSIAAATGFVK.[K]		1	SYUA_HUMAN_P37840	SYUA_HUMAN_P37840	0	2	0.6809	0	1	1	739.898	1478.79	1478.78	2.41	0.00178	6621528	HCD (High Energy Collision Dissociation)	MS2	1.56325	60	26.132	6436	20241018_FJ_VOLTA_MP_Easy15_45min_1891_DDA_200ng_1_241018150029.raw	F13	4.23	1
FALSE	High	Sequest HT (A2)	Unambiguous	[K].TVEGAGSIAAATGFVK.[K]		1	SYUA_HUMAN_P37840	SYUA_HUMAN_P37840	0	2	0.7227	0	1	1	739.9	1478.79	1478.78	4.97	0.00367	1.82733e+06	HCD (High Energy Collision Dissociation)	MS2	1.455	60	22.7702	8757	20241018_FJ_VOLTA_MP_Easy15_45min_1891_DDA_200ng_11.raw	F3	4.22	1
FALSE	High	Sequest HT (A2)	Unambiguous	[K].EGVVhGVATVAEK.[T]	H5(Oxidation)	1	SYUA_HUMAN_P37840	SYUA_HUMAN_P37840	0	2	0.109	0	1	1	656.349	1311.69	1311.69	0.88	0.00057	31224778	HCD (High Energy Collision Dissociation)	MS2	0.353018	60	11.7645	3787	20241018_FJ_VOLTA_MP_Easy15_45min_1891_DDA_200ng_11.raw	F3	4.22	1
FALSE	High	Sequest HT (A2)	Unambiguous	[K].EQVTnVGGAVVTGVTAVAQK.[T]	N5(Deamidated)	1	SYUA_HUMAN_P37840	SYUA_HUMAN_P37840	0	2	0.2133	0	1	1	965.019	1929.03	1929.03	1.01	0.00097	1.50323e+06	HCD (High Energy Collision Dissociation)	MS2	0	60	24.5575	7721	20241018_FJ_VOLTA_MP_Easy15_45min_1891_DDA_200ng_3.raw	F11	4.22	1
FALSE	High	Sequest HT (A2)	Unambiguous	[K].TVEGAGSIAAATGfVK.[K]	F14(Oxidation)	1	SYUA_HUMAN_P37840	SYUA_HUMAN_P37840	0	2	0.0214	0	1	1	747.895	1494.78	1494.78	1.79	0.00133	3242100	HCD (High Energy Collision Dissociation)	MS2	24.7532	60	27.0581	6851	20241018_FJ_VOLTA_MP_Easy15_45min_1891_DDA_200ng_1_241018150029.raw	F13	4.21	1
FALSE	High	Sequest HT (A2)	Unambiguous	[K].TKEQVTnVGGAVVTGVTAVAQK.[T]	N7(Deamidated)	1	SYUA_HUMAN_P37840	SYUA_HUMAN_P37840	1	3	0.0309	0	1	1	720.066	2158.18	2158.17	5.81	0.00418	1.46064e+06	HCD (High Energy Collision Dissociation)	MS2	19.5544	60	19.0677	5701	20241018_FJ_VOLTA_MP_Easy15_45min_1891_DDA_200ng_3.raw	F11	4.21	1
FALSE	High	Sequest HT (A2)	Unambiguous	[K].EGVVHGVATVAEK.[T]		1	SYUA_HUMAN_P37840	SYUA_HUMAN_P37840	0	2	0.3476	0	1	1	648.351	1295.7	1295.7	0.26	0.00017	12968412	HCD (High Energy Collision Dissociation)	MS2	0.699022	60	7.7508	1695	20241018_FJ_VOLTA_MP_Easy15_45min_1891_DDA_200ng_13.raw	F1	4.2	1
FALSE	High	Sequest HT (A2)	Unambiguous	[K].TKEGVVHGVATVAEK.[T]		1	SYUA_HUMAN_P37840	SYUA_HUMAN_P37840	1	3	0.569	0	1	1	508.952	1524.84	1524.84	2.29	0.00116	4.13386e+06	HCD (High Energy Collision Dissociation)	MS2	4.26565	60	6.2348	1255	20241018_FJ_VOLTA_MP_Easy15_45min_1891_DDA_200ng_7.raw	F7	4.2	1
FALSE	High	Sequest HT (A2)	Unambiguous	[K].TVEGAGSIAAATGFVK.[K]		1	SYUA_HUMAN_P37840	SYUA_HUMAN_P37840	0	2	0.6866	0	1	1	739.895	1478.78	1478.78	-1.3	-0.00096	5.82018e+06	HCD (High Energy Collision Dissociation)	MS2	0.920175	60	18.592	6466	20241018_FJ_VOLTA_MP_Easy15_45min_1891_DDA_200ng_7.raw	F7	4.18	1
FALSE	High	Sequest HT (A2)	Unambiguous	[K].TVEGAGSIAAATGFVK.[K]		1	SYUA_HUMAN_P37840	SYUA_HUMAN_P37840	0	2	0.6683	0	1	1	739.897	1478.79	1478.78	1.09	0.00081	2.94334e+06	HCD (High Energy Collision Dissociation)	MS2	1.46851	60	21.4375	6147	20241018_FJ_VOLTA_MP_Easy15_45min_1891_DDA_200ng_2.raw	F12	4.16	1
FALSE	High	Sequest HT (A2)	Unambiguous	[K].TVEGAGSIAAATGFvK.[K]	V15(Oxidation)	1	SYUA_HUMAN_P37840	SYUA_HUMAN_P37840	0	2		0.0189	2	2	747.896	1494.79	1494.78	3.83	0.00286	2.01226e+06	HCD (High Energy Collision Dissociation)	MS2	28.3197	60	23.2539	8995	20241018_FJ_VOLTA_MP_Easy15_45min_1891_DDA_200ng_11.raw	F3	4.16	1
FALSE	High	Sequest HT (A2)	Unambiguous	[K].TKEQVTNVGGAVVTGVTAVAQK.[T]		1	SYUA_HUMAN_P37840	SYUA_HUMAN_P37840	1	4	1	0	1	1	540.054	2157.19	2157.19	2.28	0.00123	605486	HCD (High Energy Collision Dissociation)	MS2	0	60	18.7106	5427	20241018_FJ_VOLTA_MP_Easy15_45min_1891_DDA_200ng_4.raw	F10	4.14	1
FALSE	High	Sequest HT (A2)	Unambiguous	[K].TKEQVTNVGGAVVTGVTAVAQK.[T]		1	SYUA_HUMAN_P37840	SYUA_HUMAN_P37840	1	3	0.7046	0	1	1	719.735	2157.19	2157.19	1.49	0.00107	1.0782e+06	HCD (High Energy Collision Dissociation)	MS2	2.18691	60	18.8216	5897	20241018_FJ_VOLTA_MP_Easy15_45min_1891_DDA_200ng_10.raw	F4	4.13	1
FALSE	High	Sequest HT (A2)	Unambiguous	[K].EGVVHGVATVAEK.[T]		1	SYUA_HUMAN_P37840	SYUA_HUMAN_P37840	0	3	0.4964	0	1	1	432.572	1295.7	1295.7	5.64	0.00244	37834920	HCD (High Energy Collision Dissociation)	MS2	2.5657	60	7.6398	1662	20241018_FJ_VOLTA_MP_Easy15_45min_1891_DDA_200ng_13.raw	F1	4.13	1
FALSE	High	Sequest HT (A2)	Unambiguous	[K].TVEGAGSIAAATGFvK.[K]	V15(Oxidation)	1	SYUA_HUMAN_P37840	SYUA_HUMAN_P37840	0	2		0.0214	2	2	747.895	1494.78	1494.78	1.79	0.00133	3242100	HCD (High Energy Collision Dissociation)	MS2	24.7532	60	27.0581	6851	20241018_FJ_VOLTA_MP_Easy15_45min_1891_DDA_200ng_1_241018150029.raw	F13	4.12	1
FALSE	High	Sequest HT (A2)	Unambiguous	[K].EGVVHGVATVAEK.[T]		1	SYUA_HUMAN_P37840	SYUA_HUMAN_P37840	0	2	0.3422	0	1	1	648.351	1295.69	1295.7	-0.31	-0.0002	12392972	HCD (High Energy Collision Dissociation)	MS2	0.466625	60	7.6922	1697	20241018_FJ_VOLTA_MP_Easy15_45min_1891_DDA_200ng_6.raw	F8	4.12	1
FALSE	High	Sequest HT (A2)	Unambiguous	[K].EGVVHGVATVAEK.[T]		1	SYUA_HUMAN_P37840	SYUA_HUMAN_P37840	0	3	0.4951	0	1	1	432.572	1295.7	1295.7	4.09	0.00177	155074400	HCD (High Energy Collision Dissociation)	MS2	1.53313	11.29	7.6524	1818	20241018_FJ_VOLTA_MP_Easy15_45min_1891_DDA_200ng_9.raw	F5	4.12	1
FALSE	High	Sequest HT (A2)	Unambiguous	[K].TVEGAGSIAAATGFVK.[K]		1	SYUA_HUMAN_P37840	SYUA_HUMAN_P37840	0	2	0.665	0	1	1	739.898	1478.79	1478.78	2.49	0.00184	5.25462e+06	HCD (High Energy Collision Dissociation)	MS2	4.89117	60	22.2587	8510	20241018_FJ_VOLTA_MP_Easy15_45min_1891_DDA_200ng_11.raw	F3	4.12	1
FALSE	High	Sequest HT (A2)	Unambiguous	[K].TVEGAGsIAAATGFVK.[K]	S7(Oxidation)	1	SYUA_HUMAN_P37840	SYUA_HUMAN_P37840	0	2		0.0419	2	2	747.894	1494.78	1494.78	1.13	0.00085	1.00803e+06	HCD (High Energy Collision Dissociation)	MS2	0	60	14.6569	4766	20241018_FJ_VOLTA_MP_Easy15_45min_1891_DDA_200ng_9.raw	F5	4.12	1
FALSE	High	Sequest HT (A2)	Unambiguous	[K].EGVVHGVATVAEK.[T]		1	SYUA_HUMAN_P37840	SYUA_HUMAN_P37840	0	3	0.4939	0	1	1	432.573	1295.7	1295.7	6.98	0.00302	74244000	HCD (High Energy Collision Dissociation)	MS2	1.92516	33.908	7.8013	1777	20241018_FJ_VOLTA_MP_Easy15_45min_1891_DDA_200ng_3.raw	F11	4.11	1
FALSE	High	Sequest HT (A2)	Unambiguous	[K].EGVVHGVATVAEK.[T]		1	SYUA_HUMAN_P37840	SYUA_HUMAN_P37840	0	3	0.4878	0	1	1	432.573	1295.7	1295.7	5.85	0.00253	57822884	HCD (High Energy Collision Dissociation)	MS2	1.4002	22.166	7.7258	1687	20241018_FJ_VOLTA_MP_Easy15_45min_1891_DDA_200ng_13.raw	F1	4.1	1
FALSE	High	Sequest HT (A2)	Unambiguous	[K].EGVVHGVATVAEK.[T]		1	SYUA_HUMAN_P37840	SYUA_HUMAN_P37840	0	3	0.4963	0	1	1	432.573	1295.7	1295.7	6.7	0.00289	959653888	HCD (High Energy Collision Dissociation)	MS2	1.70387	5.003	7.5161	1969	20241018_FJ_VOLTA_MP_Easy15_45min_1891_DDA_200ng_11.raw	F3	4.09	1
FALSE	High	Sequest HT (A2)	Unambiguous	[K].TKEqVTnVGGAVVTGVTAVAQK.[T]	Q4(Deamidated); N7(Deamidated)	1	SYUA_HUMAN_P37840	SYUA_HUMAN_P37840	1	3	0.6446	0	1	1	720.39	2159.16	2159.16	0.72	0.00052	730702	HCD (High Energy Collision Dissociation)	MS2	2.84679	60	24.4846	9070	20241018_FJ_VOLTA_MP_Easy15_45min_1891_DDA_200ng_7.raw	F7	4.08	1
FALSE	High	Sequest HT (A2)	Unambiguous	[K].TKEGVLYVGSKTK.[E]		1	SYUA_HUMAN_P37840	SYUA_HUMAN_P37840	2	3	0.5956	0	1	1	470.606	1409.8	1409.8	2	0.00094	1.8517e+06	HCD (High Energy Collision Dissociation)	MS2	4.37195	60	6.2612	1345	20241018_FJ_VOLTA_MP_Easy15_45min_1891_DDA_200ng_11.raw	F3	4.08	1
FALSE	High	Sequest HT (A2)	Unambiguous	[K].TVEGAGSIAAATGFVk.[K]	K16(Oxidation)	1	SYUA_HUMAN_P37840	SYUA_HUMAN_P37840	0	2		0.0377	3	3	747.896	1494.79	1494.78	3.83	0.00286	2.01226e+06	HCD (High Energy Collision Dissociation)	MS2	28.3197	60	23.2539	8995	20241018_FJ_VOLTA_MP_Easy15_45min_1891_DDA_200ng_11.raw	F3	4.08	1
FALSE	High	Sequest HT (A2)	Unambiguous	[K].TKEqVTNVGGAVVTGVTAVAQK.[T]	Q4(Deamidated)	1	SYUA_HUMAN_P37840	SYUA_HUMAN_P37840	1	3		0.0309	2	2	720.066	2158.18	2158.17	5.81	0.00418	1.46064e+06	HCD (High Energy Collision Dissociation)	MS2	19.5544	60	19.0677	5701	20241018_FJ_VOLTA_MP_Easy15_45min_1891_DDA_200ng_3.raw	F11	4.08	1
FALSE	High	Sequest HT (A2)	Unambiguous	[K].EGVVHGVATVAEK.[T]		1	SYUA_HUMAN_P37840	SYUA_HUMAN_P37840	0	3	0.5271	0	1	1	432.573	1295.7	1295.7	6.77	0.00293	37845036	HCD (High Energy Collision Dissociation)	MS2	2.08326	50.971	7.7756	1765	20241018_FJ_VOLTA_MP_Easy15_45min_1891_DDA_200ng_3.raw	F11	4.06	1
FALSE	High	Sequest HT (A2)	Unambiguous	[K].EGVVHGVATVAEK.[T]		1	SYUA_HUMAN_P37840	SYUA_HUMAN_P37840	0	3	0.4889	0	1	1	432.573	1295.7	1295.7	6.14	0.00265	136144720	HCD (High Energy Collision Dissociation)	MS2	2.37689	23.586	7.9086	1707	20241018_FJ_VOLTA_MP_Easy15_45min_1891_DDA_200ng_2.raw	F12	4.05	1
FALSE	High	Sequest HT (A2)	Unambiguous	[K].EGVVHGVATVAEK.[T]		1	SYUA_HUMAN_P37840	SYUA_HUMAN_P37840	0	3	0.505	0	1	1	432.573	1295.7	1295.7	6.07	0.00262	33193288	HCD (High Energy Collision Dissociation)	MS2	1.87458	57.974	7.7019	1701	20241018_FJ_VOLTA_MP_Easy15_45min_1891_DDA_200ng_6.raw	F8	4.04	1
FALSE	High	Sequest HT (A2)	Unambiguous	[K].TKEQVTnVGGAVVTGVTAVAQK.[T]	N7(Deamidated)	1	SYUA_HUMAN_P37840	SYUA_HUMAN_P37840	1	4	0.0794	0	1	1	540.299	2158.18	2158.17	1.99	0.00107	815564	HCD (High Energy Collision Dissociation)	MS2	6.52319	60	25.2714	6017	20241018_FJ_VOLTA_MP_Easy15_45min_1891_DDA_200ng_1_241018150029.raw	F13	4.03	1
FALSE	High	Sequest HT (A2)	Unambiguous	[K].TKEQVTnVGGAVVTGVTAVAQK.[T]	N7(Deamidated)	1	SYUA_HUMAN_P37840	SYUA_HUMAN_P37840	1	3	0.0149	0	1	1	720.063	2158.18	2158.17	1.83	0.00131	1.46322e+06	HCD (High Energy Collision Dissociation)	MS2	1.2102	60	19.9296	6930	20241018_FJ_VOLTA_MP_Easy15_45min_1891_DDA_200ng_8.raw	F6	4.03	1
FALSE	High	Sequest HT (A2)	Unambiguous	[K].AKEGVVAAAEK.[T]		1	SYUA_HUMAN_P37840	SYUA_HUMAN_P37840	1	3	0.5821	0	1	1	358.206	1072.6	1072.6	2.37	0.00085	86640600	HCD (High Energy Collision Dissociation)	MS2	2.41806	13.788	6.149	1120	20241018_FJ_VOLTA_MP_Easy15_45min_1891_DDA_200ng_13.raw	F1	4.02	1
FALSE	High	Sequest HT (A2)	Unambiguous	[K].TVEGAGSIAAATGFVK.[K]		1	SYUA_HUMAN_P37840	SYUA_HUMAN_P37840	0	2	0.6965	0	1	1	739.897	1478.79	1478.78	0.93	0.00068	5223815	HCD (High Energy Collision Dissociation)	MS2	0.753348	60	20.7944	6532	20241018_FJ_VOLTA_MP_Easy15_45min_1891_DDA_200ng_10.raw	F4	4.02	1
FALSE	High	Sequest HT (A2)	Unambiguous	[K].TKEqVTNVGGAVVTGVTAVAqK.[T]	Q4(Deamidated); Q21(Deamidated)	1	SYUA_HUMAN_P37840	SYUA_HUMAN_P37840	1	3	0.7264	0	1	1	720.39	2159.16	2159.16	-0.04	-3e-05	1.37706e+06	HCD (High Energy Collision Dissociation)	MS2	4.75767	60	20.9561	7941	20241018_FJ_VOLTA_MP_Easy15_45min_1891_DDA_200ng_12.raw	F2	4.02	1
FALSE	High	Sequest HT (A2)	Unambiguous	[K].EQVTNVGGAVVTGVTAVAqK.[T]	Q19(Deamidated)	1	SYUA_HUMAN_P37840	SYUA_HUMAN_P37840	0	3	0.2811	0	1	1	643.682	1929.03	1929.03	1.51	0.00097	1.18715e+06	HCD (High Energy Collision Dissociation)	MS2	2.70815	60	24.3842	7183	20241018_FJ_VOLTA_MP_Easy15_45min_1891_DDA_200ng_2.raw	F12	4.02	1
FALSE	High	Sequest HT (A2)	Unambiguous	[K].TVEGAGSIAAATGFVk.[K]	K16(Oxidation)	1	SYUA_HUMAN_P37840	SYUA_HUMAN_P37840	0	2		0.0451	3	3	747.895	1494.78	1494.78	1.79	0.00133	3242100	HCD (High Energy Collision Dissociation)	MS2	24.7532	60	27.0581	6851	20241018_FJ_VOLTA_MP_Easy15_45min_1891_DDA_200ng_1_241018150029.raw	F13	4.02	1
FALSE	High	Sequest HT (A2)	Unambiguous	[K].AKEGVVAAAEK.[T]		1	SYUA_HUMAN_P37840	SYUA_HUMAN_P37840	1	3	0.56	0	1	1	358.206	1072.6	1072.6	3.73	0.00133	326187552	HCD (High Energy Collision Dissociation)	MS2	2.51209	6.264	6.1287	1197	20241018_FJ_VOLTA_MP_Easy15_45min_1891_DDA_200ng_7.raw	F7	4	1
FALSE	High	Sequest HT (A2)	Unambiguous	[K].EGVVHGVATVAEK.[T]		1	SYUA_HUMAN_P37840	SYUA_HUMAN_P37840	0	3	0.5176	0	1	1	432.574	1295.71	1295.7	8.47	0.00366	301022176	HCD (High Energy Collision Dissociation)	MS2	49.7202	5.445	7.5936	1904	20241018_FJ_VOLTA_MP_Easy15_45min_1891_DDA_200ng_7.raw	F7	3.98	1
FALSE	High	Sequest HT (A2)	Unambiguous	[K].EGVVHGVATVAEK.[T]		1	SYUA_HUMAN_P37840	SYUA_HUMAN_P37840	0	3	0.4925	0	1	1	432.573	1295.7	1295.7	5.85	0.00253	8527423	HCD (High Energy Collision Dissociation)	MS2	2.39248	60	9.0498	2628	20241018_FJ_VOLTA_MP_Easy15_45min_1891_DDA_200ng_11.raw	F3	3.98	1
FALSE	High	Sequest HT (A2)	Unambiguous	[K].EGVVHGVATVAEK.[T]		1	SYUA_HUMAN_P37840	SYUA_HUMAN_P37840	0	2	0.2889	0	1	1	648.354	1295.7	1295.7	4.88	0.00316	1326726	HCD (High Energy Collision Dissociation)	MS2	8.38559	60	8.1415	2118	20241018_FJ_VOLTA_MP_Easy15_45min_1891_DDA_200ng_7.raw	F7	3.98	1
FALSE	High	Sequest HT (A2)	Unambiguous	[K].TKEQVTnVGGAVVTGVTAVAQK.[T]	N7(Deamidated)	1	SYUA_HUMAN_P37840	SYUA_HUMAN_P37840	1	3	0.0427	0	1	1	720.062	2158.17	2158.17	0.55	0.0004	1.08488e+06	HCD (High Energy Collision Dissociation)	MS2	0	60	20.1481	5460	20241018_FJ_VOLTA_MP_Easy15_45min_1891_DDA_200ng_6.raw	F8	3.98	1
FALSE	High	Sequest HT (A2)	Unambiguous	[K].TKEqVTNVGGAVVTGVTAVAQK.[T]	Q4(Deamidated)	1	SYUA_HUMAN_P37840	SYUA_HUMAN_P37840	1	3		0.0149	2	2	720.063	2158.18	2158.17	1.83	0.00131	1.46322e+06	HCD (High Energy Collision Dissociation)	MS2	1.2102	60	19.9296	6930	20241018_FJ_VOLTA_MP_Easy15_45min_1891_DDA_200ng_8.raw	F6	3.97	1
FALSE	High	Sequest HT (A2)	Unambiguous	[K].EQVTNVGGAVVTGVTAVAQK.[T]		1	SYUA_HUMAN_P37840	SYUA_HUMAN_P37840	0	2	0.7399	0	1	1	964.529	1928.05	1928.04	2.72	0.00262	727461	HCD (High Energy Collision Dissociation)	MS2	0	60	23.1055	8924	20241018_FJ_VOLTA_MP_Easy15_45min_1891_DDA_200ng_11.raw	F3	3.96	1
FALSE	High	Sequest HT (A2)	Unambiguous	[K].TKEGVVHGVATVAEK.[T]		1	SYUA_HUMAN_P37840	SYUA_HUMAN_P37840	1	2	0.7778	0	1	1	762.922	1524.84	1524.84	-0.62	-0.00047	318646	HCD (High Energy Collision Dissociation)	MS2	0	60	6.3994	1251	20241018_FJ_VOLTA_MP_Easy15_45min_1891_DDA_200ng_13.raw	F1	3.96	1
FALSE	High	Sequest HT (A2)	Unambiguous	[K].EQVTnVGGAVVTGVTAVAQK.[T]	N5(Deamidated)	1	SYUA_HUMAN_P37840	SYUA_HUMAN_P37840	0	2	0.3131	0	1	1	965.02	1929.03	1929.03	1.58	0.00152	547420	HCD (High Energy Collision Dissociation)	MS2	18.3601	60	27.6126	10556	20241018_FJ_VOLTA_MP_Easy15_45min_1891_DDA_200ng_7.raw	F7	3.96	1
FALSE	High	Sequest HT (A2)	Unambiguous	[K].AKEGVVAAAEK.[T]		1	SYUA_HUMAN_P37840	SYUA_HUMAN_P37840	1	3	0.5747	0	1	1	358.206	1072.6	1072.6	2.37	0.00085	236040000	HCD (High Energy Collision Dissociation)	MS2	2.27726	6.252	6.1778	1300	20241018_FJ_VOLTA_MP_Easy15_45min_1891_DDA_200ng_11.raw	F3	3.95	1
FALSE	High	Sequest HT (A2)	Unambiguous	[K].TVEGAGSIAAATGFVK.[K]		1	SYUA_HUMAN_P37840	SYUA_HUMAN_P37840	0	2	0.6962	0	1	1	739.898	1478.79	1478.78	2.49	0.00184	2.09559e+06	HCD (High Energy Collision Dissociation)	MS2	1.27308	60	21.4676	8177	20241018_FJ_VOLTA_MP_Easy15_45min_1891_DDA_200ng_12.raw	F2	3.95	1
FALSE	High	Sequest HT (A2)	Unambiguous	[K].AKEGVVAAAEK.[T]		1	SYUA_HUMAN_P37840	SYUA_HUMAN_P37840	1	2	0.5291	0	1	1	536.805	1072.6	1072.6	2.24	0.0012	376578144	HCD (High Energy Collision Dissociation)	MS2	1.69817	5.847	6.1576	1289	20241018_FJ_VOLTA_MP_Easy15_45min_1891_DDA_200ng_11.raw	F3	3.95	1
FALSE	High	Sequest HT (A2)	Unambiguous	[K].EQVTNVGGAVVTGVTAVAqK.[T]	Q19(Deamidated)	1	SYUA_HUMAN_P37840	SYUA_HUMAN_P37840	0	3	0.764	0	1	1	643.683	1929.03	1929.03	2.64	0.0017	601140	HCD (High Energy Collision Dissociation)	MS2	2.10733	60	24.2022	7297	20241018_FJ_VOLTA_MP_Easy15_45min_1891_DDA_200ng_4.raw	F10	3.94	1
FALSE	High	Sequest HT (A2)	Unambiguous	[K].EGVVHGVATVAEK.[T]		1	SYUA_HUMAN_P37840	SYUA_HUMAN_P37840	0	3	0.5127	0	1	1	432.572	1295.7	1295.7	3.73	0.00161	25779000	HCD (High Energy Collision Dissociation)	MS2	2.97393	47.402	8.0253	2178	20241018_FJ_VOLTA_MP_Easy15_45min_1891_DDA_200ng_11.raw	F3	3.94	1
FALSE	High	Sequest HT (A2)	Unambiguous	[K].EGVVHGVATVAEK.[T]		1	SYUA_HUMAN_P37840	SYUA_HUMAN_P37840	0	3	0.4822	0	1	1	432.573	1295.7	1295.7	6.7	0.00289	87651592	HCD (High Energy Collision Dissociation)	MS2	2.23672	43.784	7.8297	1788	20241018_FJ_VOLTA_MP_Easy15_45min_1891_DDA_200ng_3.raw	F11	3.94	1
FALSE	High	Sequest HT (A2)	Unambiguous	[K].AKEGVVAAAEK.[T]		1	SYUA_HUMAN_P37840	SYUA_HUMAN_P37840	1	3	0.6005	0	1	1	358.205	1072.6	1072.6	0.32	0.00011	32600128	HCD (High Energy Collision Dissociation)	MS2	2.07964	38.763	6.155	1274	20241018_FJ_VOLTA_MP_Easy15_45min_1891_DDA_200ng_12.raw	F2	3.93	1
FALSE	High	Sequest HT (A2)	Unambiguous	[K].DQLGKnEEGAPQEGILeDMPVDPDNeAYEMPSEEGYQDYEPEA.[-]	N6(Deamidated); E17(Oxidation); E26(Oxidation)	1	SYUA_HUMAN_P37840	SYUA_HUMAN_P37840	1	4	0.0025	0	1	1	1216.01	4861	4860.99	1.67	0.00203	481608	HCD (High Energy Collision Dissociation)	MS2	0	60	28.748	11133	20241018_FJ_VOLTA_MP_Easy15_45min_1891_DDA_200ng_7.raw	F7	3.93	1
FALSE	High	Sequest HT (A2)	Unambiguous	[K].DQLGKnEEGAPQEGILEDMPvDPDNEAyEMPSEEGYQDYEPEA.[-]	N6(Deamidated); V21(Oxidation); Y28(Oxidation)	1	SYUA_HUMAN_P37840	SYUA_HUMAN_P37840	1	4		0.0025	2	2	1216.01	4861	4860.99	1.67	0.00203	481608	HCD (High Energy Collision Dissociation)	MS2	0	60	28.748	11133	20241018_FJ_VOLTA_MP_Easy15_45min_1891_DDA_200ng_7.raw	F7	3.92	1
FALSE	High	Sequest HT (A2)	Unambiguous	[K].EQVTNVGGAVVTGVTAVAQK.[T]		1	SYUA_HUMAN_P37840	SYUA_HUMAN_P37840	0	3	1	0	1	1	643.354	1928.05	1928.04	1.89	0.00121	1.16751e+06	HCD (High Energy Collision Dissociation)	MS2	42.5808	60	23.0276	8938	20241018_FJ_VOLTA_MP_Easy15_45min_1891_DDA_200ng_12.raw	F2	3.92	1
FALSE	High	Sequest HT (A2)	Unambiguous	[K].DQLGKnEEGAPQEGILEDmPVDPDNEAYEmPSEEGYQDYEPEA.[-]	N6(Deamidated); M19(Oxidation); M30(Oxidation)	1	SYUA_HUMAN_P37840	SYUA_HUMAN_P37840	1	4		0.0025	2	3	1216.01	4861	4860.99	1.67	0.00203	481608	HCD (High Energy Collision Dissociation)	MS2	0	60	28.748	11133	20241018_FJ_VOLTA_MP_Easy15_45min_1891_DDA_200ng_7.raw	F7	3.92	1
FALSE	High	Sequest HT (A2)	Unambiguous	[K].AKEGVVAAAEK.[T]		1	SYUA_HUMAN_P37840	SYUA_HUMAN_P37840	1	3	0.624	0	1	1	358.205	1072.6	1072.6	0.57	0.00021	32606176	HCD (High Energy Collision Dissociation)	MS2	2.58238	57.201	6.1412	1114	20241018_FJ_VOLTA_MP_Easy15_45min_1891_DDA_200ng_8.raw	F6	3.91	1
FALSE	High	Sequest HT (A2)	Unambiguous	[K].AKEGVVAAAEK.[T]		1	SYUA_HUMAN_P37840	SYUA_HUMAN_P37840	1	2	0.5115	0	1	1	536.804	1072.6	1072.6	0.07	4e-05	54696308	HCD (High Energy Collision Dissociation)	MS2	1.81759	27.864	6.1503	1121	20241018_FJ_VOLTA_MP_Easy15_45min_1891_DDA_200ng_13.raw	F1	3.91	1
FALSE	High	Sequest HT (A2)	Unambiguous	[K].DQLGKnEEGAPQEGILEDMpVDpDNEAYEMPSEEGYQDYEPEA.[-]	N6(Deamidated); P20(Oxidation); P23(Oxidation)	1	SYUA_HUMAN_P37840	SYUA_HUMAN_P37840	1	4		0.0051	4	4	1216.01	4861	4860.99	1.67	0.00203	481608	HCD (High Energy Collision Dissociation)	MS2	0	60	28.748	11133	20241018_FJ_VOLTA_MP_Easy15_45min_1891_DDA_200ng_7.raw	F7	3.91	1
FALSE	High	Sequest HT (A2)	Unambiguous	[K].TVEGAGSIAAATGFvK.[K]	V15(Oxidation)	1	SYUA_HUMAN_P37840	SYUA_HUMAN_P37840	0	2	0.0206	0	1	1	747.895	1494.78	1494.78	1.54	0.00115	1.02391e+06	HCD (High Energy Collision Dissociation)	MS2	3.63727	60	17.3672	5915	20241018_FJ_VOLTA_MP_Easy15_45min_1891_DDA_200ng_9.raw	F5	3.89	1
FALSE	High	Sequest HT (A2)	Unambiguous	[K].TVEGAGSIAAATGfVK.[K]	F14(Oxidation)	1	SYUA_HUMAN_P37840	SYUA_HUMAN_P37840	0	2	0.0206	0	1	2	747.895	1494.78	1494.78	1.54	0.00115	1.02391e+06	HCD (High Energy Collision Dissociation)	MS2	3.63727	60	17.3672	5915	20241018_FJ_VOLTA_MP_Easy15_45min_1891_DDA_200ng_9.raw	F5	3.89	1
FALSE	High	Sequest HT (A2)	Unambiguous	[K].TKEqVTNVGGAVVTGVTAVAqK.[T]	Q4(Deamidated); Q21(Deamidated)	1	SYUA_HUMAN_P37840	SYUA_HUMAN_P37840	1	3	1	0	1	1	720.392	2159.16	2159.16	2.33	0.00168	577288	HCD (High Energy Collision Dissociation)	MS2	6.68106	60	21.6425	5453	20241018_FJ_VOLTA_MP_Easy15_45min_1891_DDA_200ng_13.raw	F1	3.89	1
FALSE	High	Sequest HT (A2)	Unambiguous	[K].TVEGAGSIAAATGFVK.[K]		1	SYUA_HUMAN_P37840	SYUA_HUMAN_P37840	0	2	0.6761	0	1	1	739.896	1478.78	1478.78	-0.4	-0.00029	1886251	HCD (High Energy Collision Dissociation)	MS2	4.55394	60	22.6711	8155	20241018_FJ_VOLTA_MP_Easy15_45min_1891_DDA_200ng_9.raw	F5	3.89	1
FALSE	High	Sequest HT (A2)	Unambiguous	[K].TKEGVVHGVATVAEK.[T]		1	SYUA_HUMAN_P37840	SYUA_HUMAN_P37840	1	3	0.7242	0	1	1	508.951	1524.84	1524.84	0.13	7e-05	1.60874e+06	HCD (High Energy Collision Dissociation)	MS2	0	60	7.8064	2091	20241018_FJ_VOLTA_MP_Easy15_45min_1891_DDA_200ng_11.raw	F3	3.88	1
FALSE	High	Sequest HT (A2)	Unambiguous	[K].TKEGVVHGVATVAEK.[T]		1	SYUA_HUMAN_P37840	SYUA_HUMAN_P37840	1	3	0.5349	0	1	1	508.953	1524.84	1524.84	4.09	0.00208	2413104	HCD (High Energy Collision Dissociation)	MS2	11.5671	60	6.2804	1355	20241018_FJ_VOLTA_MP_Easy15_45min_1891_DDA_200ng_11.raw	F3	3.87	1
FALSE	High	Sequest HT (A2)	Unambiguous	[K].SAGGIVLTGSAAAK.[S]		1	B1XDP6	B1XDP6	0	2	0.6796	0	1	1	601.84	1202.67	1202.67	-0.35	-0.00021	2.85964e+06	HCD (High Energy Collision Dissociation)	MS2	24.9596	60	11.1442	3551	20241018_FJ_VOLTA_MP_Easy15_45min_1891_DDA_200ng_11.raw	F3	3.87	1
FALSE	High	Sequest HT (A2)	Unambiguous	[K].TKEGVVHGVATVAEK.[T]		1	SYUA_HUMAN_P37840	SYUA_HUMAN_P37840	1	3	0.5674	0	1	1	508.953	1524.84	1524.84	3.73	0.0019	2.09333e+06	HCD (High Energy Collision Dissociation)	MS2	2.5907	60	7.2987	1869	20241018_FJ_VOLTA_MP_Easy15_45min_1891_DDA_200ng_11.raw	F3	3.86	1
FALSE	High	Sequest HT (A2)	Unambiguous	[K].EQVTnVGGAVVTGVTAVAQK.[T]	N5(Deamidated)	1	SYUA_HUMAN_P37840	SYUA_HUMAN_P37840	0	3	0.1503	0	1	1	643.684	1929.04	1929.03	5.11	0.00329	1087090	HCD (High Energy Collision Dissociation)	MS2	33.0755	60	23.4629	8584	20241018_FJ_VOLTA_MP_Easy15_45min_1891_DDA_200ng_7.raw	F7	3.86	1
FALSE	High	Sequest HT (A2)	Unambiguous	[K].EQVTNVGGAVVTGVTAVAQK.[T]		1	SYUA_HUMAN_P37840	SYUA_HUMAN_P37840	0	3	0.6753	0	1	1	643.354	1928.05	1928.04	1.23	0.00079	1.15714e+06	HCD (High Energy Collision Dissociation)	MS2	5.18706	60	26.6564	6661	20241018_FJ_VOLTA_MP_Easy15_45min_1891_DDA_200ng_1_241018150029.raw	F13	3.85	1
FALSE	High	Sequest HT (A2)	Unambiguous	[K].AKEGVVAAAEK.[T]		1	SYUA_HUMAN_P37840	SYUA_HUMAN_P37840	1	2	0.5248	0	1	1	536.804	1072.6	1072.6	0.19	0.0001	14419228	HCD (High Energy Collision Dissociation)	MS2	1.21988	60	6.1511	1052	20241018_FJ_VOLTA_MP_Easy15_45min_1891_DDA_200ng_2.raw	F12	3.83	1
FALSE	High	Sequest HT (A2)	Unambiguous	[K].AKEGVVAAAEK.[T]		1	SYUA_HUMAN_P37840	SYUA_HUMAN_P37840	1	2	0.5131	0	1	1	536.804	1072.6	1072.6	0.07	4e-05	477223968	HCD (High Energy Collision Dissociation)	MS2	1.77804	4.793	6.1639	1114	20241018_FJ_VOLTA_MP_Easy15_45min_1891_DDA_200ng_9.raw	F5	3.82	1
FALSE	High	Sequest HT (A2)	Unambiguous	[K].TVEGAGSIAAATGFVK.[K]		1	SYUA_HUMAN_P37840	SYUA_HUMAN_P37840	0	2	0.6806	0	1	1	739.896	1478.78	1478.78	-0.31	-0.00023	2.68805e+06	HCD (High Energy Collision Dissociation)	MS2	8.72334	60	19.6226	7269	20241018_FJ_VOLTA_MP_Easy15_45min_1891_DDA_200ng_11.raw	F3	3.82	1
FALSE	High	Sequest HT (A2)	Unambiguous	[K].TVEGAGSIAAATGFVk.[K]	K16(Oxidation)	1	SYUA_HUMAN_P37840	SYUA_HUMAN_P37840	0	2		0.0206	3	3	747.895	1494.78	1494.78	1.54	0.00115	1.02391e+06	HCD (High Energy Collision Dissociation)	MS2	3.63727	60	17.3672	5915	20241018_FJ_VOLTA_MP_Easy15_45min_1891_DDA_200ng_9.raw	F5	3.81	1
FALSE	High	Sequest HT (A2)	Unambiguous	[K].TKEqVTNVGGAVVTGVTAVAQK.[T]	Q4(Deamidated)	1	SYUA_HUMAN_P37840	SYUA_HUMAN_P37840	1	3		0.0427	2	2	720.062	2158.17	2158.17	0.55	0.0004	1.08488e+06	HCD (High Energy Collision Dissociation)	MS2	0	60	20.1481	5460	20241018_FJ_VOLTA_MP_Easy15_45min_1891_DDA_200ng_6.raw	F8	3.81	1
FALSE	High	Sequest HT (A2)	Unambiguous	[K].DQLGKnEEGAPQEGILEdMPVdPDNEAYEMPSEEGYQDYEPEA.[-]	N6(Deamidated); D18(Oxidation); D22(Oxidation)	1	SYUA_HUMAN_P37840	SYUA_HUMAN_P37840	1	4		0.0305	5	5	1216.01	4861	4860.99	1.67	0.00203	481608	HCD (High Energy Collision Dissociation)	MS2	0	60	28.748	11133	20241018_FJ_VOLTA_MP_Easy15_45min_1891_DDA_200ng_7.raw	F7	3.81	1
FALSE	High	Sequest HT (A2)	Unambiguous	[K].DQLGKnEEGAPQEGILEDMPVdPdNEAYEMPSEEGYQDYEPEA.[-]	N6(Deamidated); D22(Oxidation); D24(Oxidation)	1	SYUA_HUMAN_P37840	SYUA_HUMAN_P37840	1	4		0.0331	6	6	1216.01	4861	4860.99	1.67	0.00203	481608	HCD (High Energy Collision Dissociation)	MS2	0	60	28.748	11133	20241018_FJ_VOLTA_MP_Easy15_45min_1891_DDA_200ng_7.raw	F7	3.8	1
FALSE	High	Sequest HT (A2)	Unambiguous	[K].FGVSAAAAVAVAAGPVEAAEEK.[T]		1	C5A0S6	C5A0S6	0	3	0.7026	0	1	1	672.353	2015.05	2015.04	0.34	0.00023	514310	HCD (High Energy Collision Dissociation)	MS2	1.83397	60	28.6419	10100	20241018_FJ_VOLTA_MP_Easy15_45min_1891_DDA_200ng_5.raw	F9	3.8	1
FALSE	High	Sequest HT (A2)	Unambiguous	[K].EQVTNVGGAVVTGVTAVAqK.[T]	Q19(Deamidated)	1	SYUA_HUMAN_P37840	SYUA_HUMAN_P37840	0	2	0.5567	0	1	1	965.018	1929.03	1929.03	0.25	0.00024	937712	HCD (High Energy Collision Dissociation)	MS2	1.08169	60	24.0493	7538	20241018_FJ_VOLTA_MP_Easy15_45min_1891_DDA_200ng_3.raw	F11	3.79	1
FALSE	High	Sequest HT (A2)	Unambiguous	[K].TVEGAGSIAAATGFVK.[K]		1	SYUA_HUMAN_P37840	SYUA_HUMAN_P37840	0	2	0.6817	0	1	1	739.896	1478.79	1478.78	0.18	0.00013	1.62511e+06	HCD (High Energy Collision Dissociation)	MS2	0	60	18.7664	5598	20241018_FJ_VOLTA_MP_Easy15_45min_1891_DDA_200ng_3.raw	F11	3.77	1
FALSE	High	Sequest HT (A2)	Unambiguous	[K].AKEGVVAAAEK.[T]		1	SYUA_HUMAN_P37840	SYUA_HUMAN_P37840	1	2	0.4761	0	1	1	536.805	1072.6	1072.6	2.01	0.00108	307182784	HCD (High Energy Collision Dissociation)	MS2	1.94425	8.683	6.13	1198	20241018_FJ_VOLTA_MP_Easy15_45min_1891_DDA_200ng_7.raw	F7	3.76	1
FALSE	High	Sequest HT (A2)	Unambiguous	[K].TVEGAGSIAAATGFVK.[K]		1	SYUA_HUMAN_P37840	SYUA_HUMAN_P37840	0	2	0.6933	0	1	1	739.898	1478.79	1478.78	2.49	0.00184	2.25746e+06	HCD (High Energy Collision Dissociation)	MS2	4.77836	60	22.1601	7920	20241018_FJ_VOLTA_MP_Easy15_45min_1891_DDA_200ng_9.raw	F5	3.75	1
FALSE	High	Sequest HT (A2)	Unambiguous	[K].EqVTnVGGAVVTGVTAVAQK.[T]	Q2(Deamidated); N5(Deamidated)	1	SYUA_HUMAN_P37840	SYUA_HUMAN_P37840	0	3	0.5573	0	1	1	644.01	1930.02	1930.01	1.22	0.00078	781004	HCD (High Energy Collision Dissociation)	MS2	20.6812	60	25.7991	9503	20241018_FJ_VOLTA_MP_Easy15_45min_1891_DDA_200ng_9.raw	F5	3.75	1
FALSE	High	Sequest HT (A2)	Unambiguous	[K].KDQLGKnEEGAPQEGILEDMPVdPdNEAYEMPSEEGYQDYEPEA.[-]	N7(Deamidated); D23(Oxidation); D25(Oxidation)	1	SYUA_HUMAN_P37840	SYUA_HUMAN_P37840	2	4	0.0027	0	1	1	1248.03	4989.11	4989.09	4.61	0.00576	388789	HCD (High Energy Collision Dissociation)	MS2	96.0735	60	25.0147	9873	20241018_FJ_VOLTA_MP_Easy15_45min_1891_DDA_200ng_11.raw	F3	3.74	1
FALSE	High	Sequest HT (A2)	Unambiguous	[K].KDQLGKnEEGAPQEGILEDMpVDpDNEAYEMPSEEGYQDYEPEA.[-]	N7(Deamidated); P21(Oxidation); P24(Oxidation)	1	SYUA_HUMAN_P37840	SYUA_HUMAN_P37840	2	4	0.0027	0	1	2	1248.03	4989.11	4989.09	4.61	0.00576	388789	HCD (High Energy Collision Dissociation)	MS2	96.0735	60	25.0147	9873	20241018_FJ_VOLTA_MP_Easy15_45min_1891_DDA_200ng_11.raw	F3	3.74	1
FALSE	High	Sequest HT (A2)	Unambiguous	[K].KDQLGKnEEGAPQEGILEDMPvDPDNEAyEMPSEEGYQDYEPEA.[-]	N7(Deamidated); V22(Oxidation); Y29(Oxidation)	1	SYUA_HUMAN_P37840	SYUA_HUMAN_P37840	2	4		0.0027	3	3	1248.03	4989.11	4989.09	4.61	0.00576	388789	HCD (High Energy Collision Dissociation)	MS2	96.0735	60	25.0147	9873	20241018_FJ_VOLTA_MP_Easy15_45min_1891_DDA_200ng_11.raw	F3	3.73	1
FALSE	High	Sequest HT (A2)	Unambiguous	[K].KDQLGKnEEGAPQEGILEDmPVDPDNEAYEmPSEEGYQDYEPEA.[-]	N7(Deamidated); M20(Oxidation); M31(Oxidation)	1	SYUA_HUMAN_P37840	SYUA_HUMAN_P37840	2	4		0.0053	4	4	1248.03	4989.11	4989.09	4.61	0.00576	388789	HCD (High Energy Collision Dissociation)	MS2	96.0735	60	25.0147	9873	20241018_FJ_VOLTA_MP_Easy15_45min_1891_DDA_200ng_11.raw	F3	3.72	1
FALSE	High	Sequest HT (A2)	Unambiguous	[K].TKEqVTnVGGAVVTGVTAVAQK.[T]	Q4(Deamidated); N7(Deamidated)	1	SYUA_HUMAN_P37840	SYUA_HUMAN_P37840	1	3	0.664	0	1	1	720.391	2159.16	2159.16	1.23	0.00088	944887	HCD (High Energy Collision Dissociation)	MS2	1.21836	60	21.4143	6304	20241018_FJ_VOLTA_MP_Easy15_45min_1891_DDA_200ng_4.raw	F10	3.72	1
FALSE	High	Sequest HT (A2)	Unambiguous	[K].EGVVHGVATVAEK.[T]		1	SYUA_HUMAN_P37840	SYUA_HUMAN_P37840	0	2	0.3315	0	1	1	648.351	1295.69	1295.7	-0.97	-0.00063	1.58812e+06	HCD (High Energy Collision Dissociation)	MS2	0	60	7.8119	1670	20241018_FJ_VOLTA_MP_Easy15_45min_1891_DDA_200ng_2.raw	F12	3.71	1
FALSE	High	Sequest HT (A2)	Unambiguous	[K].EQVTnVGGAVVTGVTAVAQK.[T]	N5(Deamidated)	1	SYUA_HUMAN_P37840	SYUA_HUMAN_P37840	0	2	0.3127	0	1	1	965.018	1929.03	1929.03	0.37	0.00036	734219	HCD (High Energy Collision Dissociation)	MS2	0	60	24.5952	7258	20241018_FJ_VOLTA_MP_Easy15_45min_1891_DDA_200ng_2.raw	F12	3.71	1
FALSE	High	Sequest HT (A2)	Unambiguous	[K].TVEGAGSiAAATGFVK.[K]	I8(Oxidation)	1	SYUA_HUMAN_P37840	SYUA_HUMAN_P37840	0	2	0.0997	0	1	1	747.894	1494.78	1494.78	0.89	0.00066	1.19546e+06	HCD (High Energy Collision Dissociation)	MS2	2.84551	60	16.3501	5499	20241018_FJ_VOLTA_MP_Easy15_45min_1891_DDA_200ng_9.raw	F5	3.71	1
FALSE	High	Sequest HT (A2)	Unambiguous	[K].AKEGVVAAAEK.[T]		1	SYUA_HUMAN_P37840	SYUA_HUMAN_P37840	1	2	0.4973	0	1	1	536.804	1072.6	1072.6	0.98	0.00053	24954590	HCD (High Energy Collision Dissociation)	MS2	1.99037	60	6.1565	1275	20241018_FJ_VOLTA_MP_Easy15_45min_1891_DDA_200ng_12.raw	F2	3.7	1
FALSE	High	Sequest HT (A2)	Unambiguous	[K].TVEGAGSIAAATGFVK.[K]		1	SYUA_HUMAN_P37840	SYUA_HUMAN_P37840	0	2	0.7154	0	1	1	739.898	1478.79	1478.78	3.07	0.00227	1.38511e+06	HCD (High Energy Collision Dissociation)	MS2	14.8306	60	20.7308	7766	20241018_FJ_VOLTA_MP_Easy15_45min_1891_DDA_200ng_11.raw	F3	3.69	1
FALSE	High	Sequest HT (A2)	Unambiguous	[K].EqVTNVGGAVVTGVTAVAqK.[T]	Q2(Deamidated); Q19(Deamidated)	1	SYUA_HUMAN_P37840	SYUA_HUMAN_P37840	0	2	0.6585	0	1	1	965.511	1930.02	1930.01	1.19	0.00115	745132	HCD (High Energy Collision Dissociation)	MS2	0	60	26.3923	9755	20241018_FJ_VOLTA_MP_Easy15_45min_1891_DDA_200ng_9.raw	F5	3.69	1
FALSE	High	Sequest HT (A2)	Unambiguous	[K].EQVTNVGGAVVTGVTAVAQK.[T]		1	SYUA_HUMAN_P37840	SYUA_HUMAN_P37840	0	3	0.7778	0	1	1	643.355	1928.05	1928.04	2.46	0.00158	421858	HCD (High Energy Collision Dissociation)	MS2	1.65228	60	22.4991	5694	20241018_FJ_VOLTA_MP_Easy15_45min_1891_DDA_200ng_13.raw	F1	3.69	1
FALSE	High	Sequest HT (A2)	Unambiguous	[K].EGVVHGVATVAEK.[T]		1	SYUA_HUMAN_P37840	SYUA_HUMAN_P37840	0	3	0.5257	0	1	1	432.571	1295.7	1295.7	1.54	0.00067	8568664	HCD (High Energy Collision Dissociation)	MS2	3.84268	60	8.5379	2405	20241018_FJ_VOLTA_MP_Easy15_45min_1891_DDA_200ng_11.raw	F3	3.69	1
FALSE	High	Sequest HT (A2)	Unambiguous	[K].SAGGIVLTGSAAAK.[S]		1	B1XDP6	B1XDP6	0	2	0.6495	0	1	1	601.84	1202.67	1202.67	-0.65	-0.00039	1.72226e+06	HCD (High Energy Collision Dissociation)	MS2	29.2075	60	11.2588	3003	20241018_FJ_VOLTA_MP_Easy15_45min_1891_DDA_200ng_3.raw	F11	3.68	1
FALSE	High	Sequest HT (A2)	Unambiguous	[K].TKEGVLYVGSK.[T]		1	SYUA_HUMAN_P37840	SYUA_HUMAN_P37840	1	3	0.5516	0	1	1	394.224	1180.66	1180.66	1.05	0.00041	6.28343e+06	HCD (High Energy Collision Dissociation)	MS2	1.76538	60	8.5964	2427	20241018_FJ_VOLTA_MP_Easy15_45min_1891_DDA_200ng_11.raw	F3	3.68	1
FALSE	High	Sequest HT (A2)	Unambiguous	[K].TKEGVLYVGSK.[T]		1	SYUA_HUMAN_P37840	SYUA_HUMAN_P37840	1	3	0.519	0	1	1	394.225	1180.66	1180.66	2.37	0.00093	25077050	HCD (High Energy Collision Dissociation)	MS2	1.90677	60	7.7363	2071	20241018_FJ_VOLTA_MP_Easy15_45min_1891_DDA_200ng_12.raw	F2	3.68	1
FALSE	High	Sequest HT (A2)	Unambiguous	[K].DQIIEAVAAmSVmDVVELISAmEEK.[F]	M10(Oxidation); M13(Oxidation); M22(Oxidation)	2	C5A0S6	C5A0S6; B7MRB2	0	3	0.1603	0	1	1	923.781	2769.33	2769.32	1.19	0.0011	443904	HCD (High Energy Collision Dissociation)	MS2	9.85271	60	37.1942	16015	20241018_FJ_VOLTA_MP_Easy15_45min_1891_DDA_200ng_12.raw	F2	3.68	1
FALSE	High	Sequest HT (A2)	Unambiguous	[K].TVEGAGSIAAATGFVK.[K]		1	SYUA_HUMAN_P37840	SYUA_HUMAN_P37840	0	2	0.7003	0	1	1	739.899	1478.79	1478.78	3.24	0.00239	546103	HCD (High Energy Collision Dissociation)	MS2	26.2462	60	28.646	11714	20241018_FJ_VOLTA_MP_Easy15_45min_1891_DDA_200ng_11.raw	F3	3.67	1
FALSE	High	Sequest HT (A2)	Unambiguous	[K].TVEGAGSIAAATGFVK.[K]		1	SYUA_HUMAN_P37840	SYUA_HUMAN_P37840	0	2	0.6557	0	1	1	739.897	1478.79	1478.78	1.59	0.00117	3.05491e+06	HCD (High Energy Collision Dissociation)	MS2	4.51006	60	25.6247	6186	20241018_FJ_VOLTA_MP_Easy15_45min_1891_DDA_200ng_1_241018150029.raw	F13	3.66	1
FALSE	High	Sequest HT (A2)	Unambiguous	[K].TKEGVLYVGSK.[T]		1	SYUA_HUMAN_P37840	SYUA_HUMAN_P37840	1	3	0.4699	0	1	1	394.227	1180.67	1180.66	7.02	0.00276	32269768	HCD (High Energy Collision Dissociation)	MS2	2.60529	47.6	8.0894	2207	20241018_FJ_VOLTA_MP_Easy15_45min_1891_DDA_200ng_11.raw	F3	3.66	1
FALSE	High	Sequest HT (A2)	Unambiguous	[K].EGVVhGVATVAEK.[T]	H5(Oxidation)	1	SYUA_HUMAN_P37840	SYUA_HUMAN_P37840	0	2	0.1202	0	1	1	656.35	1311.69	1311.69	1.71	0.00112	4.9616e+06	HCD (High Energy Collision Dissociation)	MS2	1.30469	60	11.8166	3486	20241018_FJ_VOLTA_MP_Easy15_45min_1891_DDA_200ng_9.raw	F5	3.66	1
FALSE	High	Sequest HT (A2)	Unambiguous	[K].EGVVHGVATVAEK.[T]		1	SYUA_HUMAN_P37840	SYUA_HUMAN_P37840	0	3	0.5041	0	1	1	432.569	1295.69	1295.7	-1.64	-0.00071	10728176	HCD (High Energy Collision Dissociation)	MS2	2.22066	60	7.4532	1944	20241018_FJ_VOLTA_MP_Easy15_45min_1891_DDA_200ng_11.raw	F3	3.65	1
FALSE	High	Sequest HT (A2)	Unambiguous	[K].EqVTNVGGAVVTGVTAVAqK.[T]	Q2(Deamidated); Q19(Deamidated)	1	SYUA_HUMAN_P37840	SYUA_HUMAN_P37840	0	3	0.6786	0	1	1	644.01	1930.01	1930.01	1.03	0.00066	1078782	HCD (High Energy Collision Dissociation)	MS2	0.503797	60	26.4088	7854	20241018_FJ_VOLTA_MP_Easy15_45min_1891_DDA_200ng_2.raw	F12	3.64	1
FALSE	High	Sequest HT (A2)	Unambiguous	[K].AKEGVVAAAEK.[T]		1	SYUA_HUMAN_P37840	SYUA_HUMAN_P37840	1	3	0.5742	0	1	1	358.205	1072.6	1072.6	-0.37	-0.00013	14296977	HCD (High Energy Collision Dissociation)	MS2	3.30141	60	6.1501	1084	20241018_FJ_VOLTA_MP_Easy15_45min_1891_DDA_200ng_10.raw	F4	3.64	1
FALSE	High	Sequest HT (A2)	Unambiguous	[K].AKEGVVAAAEK.[T]		1	SYUA_HUMAN_P37840	SYUA_HUMAN_P37840	1	3	0.5769	0	1	1	358.205	1072.6	1072.6	0.06	2e-05	16457169	HCD (High Energy Collision Dissociation)	MS2	2.63806	60	6.1466	1077	20241018_FJ_VOLTA_MP_Easy15_45min_1891_DDA_200ng_6.raw	F8	3.64	1
FALSE	High	Sequest HT (A2)	Unambiguous	[K].KDQLGKnEEGAPQEGILEDMPVDPDNeAYeMPSEEGYQDYEPEA.[-]	N7(Deamidated); E27(Oxidation); E30(Oxidation)	1	SYUA_HUMAN_P37840	SYUA_HUMAN_P37840	2	4		0.0294	5	5	1248.03	4989.11	4989.09	4.61	0.00576	388789	HCD (High Energy Collision Dissociation)	MS2	96.0735	60	25.0147	9873	20241018_FJ_VOLTA_MP_Easy15_45min_1891_DDA_200ng_11.raw	F3	3.63	1
FALSE	High	Sequest HT (A2)	Unambiguous	[K].EqVTNVGGAVVTGVTAVAqK.[T]	Q2(Deamidated); Q19(Deamidated)	1	SYUA_HUMAN_P37840	SYUA_HUMAN_P37840	0	3	0.3526	0	1	1	644.01	1930.01	1930.01	1.03	0.00066	1206839	HCD (High Energy Collision Dissociation)	MS2	0.612503	60	25.9021	7687	20241018_FJ_VOLTA_MP_Easy15_45min_1891_DDA_200ng_2.raw	F12	3.63	1
FALSE	High	Sequest HT (A2)	Unambiguous	[K].EGVVAAAEKTK.[Q]		1	SYUA_HUMAN_P37840	SYUA_HUMAN_P37840	1	3	0.5344	0	1	1	368.208	1102.61	1102.61	0.03	1e-05	11856686	HCD (High Energy Collision Dissociation)	MS2	3.55106	60	6.1543	1212	20241018_FJ_VOLTA_MP_Easy15_45min_1891_DDA_200ng_7.raw	F7	3.63	1
FALSE	High	Sequest HT (A2)	Unambiguous	[K].EGVVHGVATVAEK.[T]		1	SYUA_HUMAN_P37840	SYUA_HUMAN_P37840	0	3	0.5402	0	1	1	432.573	1295.7	1295.7	6.14	0.00265	22242110	HCD (High Energy Collision Dissociation)	MS2	2.1057	60	7.9403	1825	20241018_FJ_VOLTA_MP_Easy15_45min_1891_DDA_200ng_3.raw	F11	3.61	1
FALSE	High	Sequest HT (A2)	Unambiguous	[K].TKEGVVhGVATVAEK.[T]	H7(Oxidation)	1	SYUA_HUMAN_P37840	SYUA_HUMAN_P37840	1	3	0.0693	0	1	1	514.285	1540.84	1540.83	3.98	0.00205	702364	HCD (High Energy Collision Dissociation)	MS2	11.3256	60	9.3157	2483	20241018_FJ_VOLTA_MP_Easy15_45min_1891_DDA_200ng_9.raw	F5	3.61	1
FALSE	High	Sequest HT (A2)	Unambiguous	[K].EGVVHGVATVAEK.[T]		1	SYUA_HUMAN_P37840	SYUA_HUMAN_P37840	0	2	0.325	0	1	1	648.353	1295.7	1295.7	1.95	0.00127	1.16727e+06	HCD (High Energy Collision Dissociation)	MS2	8.17781	60	8.3401	2102	20241018_FJ_VOLTA_MP_Easy15_45min_1891_DDA_200ng_9.raw	F5	3.6	1
FALSE	High	Sequest HT (A2)	Unambiguous	[K].DQLGKnEEGAPQEGILEDMpVDpDNEAYEMPSEEGYQDYEPEA.[-]	N6(Deamidated); P20(Oxidation); P23(Oxidation)	1	SYUA_HUMAN_P37840	SYUA_HUMAN_P37840	1	4	0.0195	0	1	1	1216.01	4861	4860.99	1.47	0.00179	759249	HCD (High Energy Collision Dissociation)	MS2	0	60	28.1613	11458	20241018_FJ_VOLTA_MP_Easy15_45min_1891_DDA_200ng_11.raw	F3	3.59	1
FALSE	High	Sequest HT (A2)	Unambiguous	[K].DQLGKnEEGAPQEGILEDMPvDPDNEAyEMPSEEGYQDYEPEA.[-]	N6(Deamidated); V21(Oxidation); Y28(Oxidation)	1	SYUA_HUMAN_P37840	SYUA_HUMAN_P37840	1	4	0.0195	0	1	2	1216.01	4861	4860.99	1.47	0.00179	759249	HCD (High Energy Collision Dissociation)	MS2	0	60	28.1613	11458	20241018_FJ_VOLTA_MP_Easy15_45min_1891_DDA_200ng_11.raw	F3	3.59	1
FALSE	High	Sequest HT (A2)	Unambiguous	[K].EGVVHGVATVAEK.[T]		1	SYUA_HUMAN_P37840	SYUA_HUMAN_P37840	0	3	0.5265	0	1	1	432.572	1295.7	1295.7	3.66	0.00158	6.94706e+06	HCD (High Energy Collision Dissociation)	MS2	7.13251	60	8.1568	2030	20241018_FJ_VOLTA_MP_Easy15_45min_1891_DDA_200ng_9.raw	F5	3.59	1
FALSE	High	Sequest HT (A2)	Unambiguous	[K].EQVTNVGGAVVTGVTAVAQK.[T]		1	SYUA_HUMAN_P37840	SYUA_HUMAN_P37840	0	2	0.7326	0	1	1	964.527	1928.05	1928.04	1.52	0.00146	543795	HCD (High Energy Collision Dissociation)	MS2	0	60	23.1802	8458	20241018_FJ_VOLTA_MP_Easy15_45min_1891_DDA_200ng_7.raw	F7	3.59	1
FALSE	High	Sequest HT (A2)	Unambiguous	[K].EQVTNVGGAVVTGVTAVAQK.[T]		1	SYUA_HUMAN_P37840	SYUA_HUMAN_P37840	0	2	0.7927	0	1	1	964.527	1928.05	1928.04	0.88	0.00085	815700	HCD (High Energy Collision Dissociation)	MS2	0	60	23.0194	8935	20241018_FJ_VOLTA_MP_Easy15_45min_1891_DDA_200ng_12.raw	F2	3.57	1
FALSE	High	Sequest HT (A2)	Unambiguous	[K].TKEGVVHGVATVAEK.[T]		1	SYUA_HUMAN_P37840	SYUA_HUMAN_P37840	1	4	0.5478	0	1	1	381.964	1524.84	1524.84	-1.6	-0.00061	1.2443e+06	HCD (High Energy Collision Dissociation)	MS2	0	60	6.4483	1239	20241018_FJ_VOLTA_MP_Easy15_45min_1891_DDA_200ng_10.raw	F4	3.56	1
FALSE	High	Sequest HT (A2)	Unambiguous	[K].TKEGVVHGVATVAEK.[T]		1	SYUA_HUMAN_P37840	SYUA_HUMAN_P37840	1	3	0.6657	0	1	1	508.952	1524.84	1524.84	2.77	0.00141	1102193	HCD (High Energy Collision Dissociation)	MS2	3.77728	60	8.3113	2303	20241018_FJ_VOLTA_MP_Easy15_45min_1891_DDA_200ng_11.raw	F3	3.56	1
FALSE	High	Sequest HT (A2)	Unambiguous	[K].EGVVAAAEKTK.[Q]		1	SYUA_HUMAN_P37840	SYUA_HUMAN_P37840	1	2	0.5042	0	1	1	551.81	1102.61	1102.61	2	0.00111	6037398	HCD (High Energy Collision Dissociation)	MS2	6.38577	60	6.1483	1208	20241018_FJ_VOLTA_MP_Easy15_45min_1891_DDA_200ng_7.raw	F7	3.55	1
FALSE	High	Sequest HT (A2)	Unambiguous	[K].TKEqVTnVGGAVVTGVTAVAqK.[T]	Q4(Deamidated); N7(Deamidated); Q21(Deamidated)	1	SYUA_HUMAN_P37840	SYUA_HUMAN_P37840	1	3	0.6356	0	1	1	720.719	2160.14	2160.14	0.72	0.00051	820475	HCD (High Energy Collision Dissociation)	MS2	4.07566	60	22.7838	6596	20241018_FJ_VOLTA_MP_Easy15_45min_1891_DDA_200ng_2.raw	F12	3.54	1
FALSE	High	Sequest HT (A2)	Unambiguous	[K].EGVVHGVATVAEK.[T]		1	SYUA_HUMAN_P37840	SYUA_HUMAN_P37840	0	3	0.4689	0	1	1	432.571	1295.7	1295.7	1.83	0.00079	1.54796e+06	HCD (High Energy Collision Dissociation)	MS2	14.0273	60	7.4723	1949	20241018_FJ_VOLTA_MP_Easy15_45min_1891_DDA_200ng_12.raw	F2	3.54	1
FALSE	High	Sequest HT (A2)	Unambiguous	[K].NEEGAPQEGILEDmPVDPDnEAYEmPSEEGYQDYEPEA.[-]	M14(Oxidation); N20(Deamidated); M25(Oxidation)	1	SYUA_HUMAN_P37840	SYUA_HUMAN_P37840	0	3	0.0367	0	1	1	1440.58	4319.72	4319.71	2.77	0.00399	1.31417e+06	HCD (High Energy Collision Dissociation)	MS2	0	60	29.4928	12167	20241018_FJ_VOLTA_MP_Easy15_45min_1891_DDA_200ng_12.raw	F2	3.54	1
FALSE	High	Sequest HT (A2)	Unambiguous	[R].REEESAAAAEVEER.[T]		1	P0ACF9	P0ACF9	1	3	0.7394	0	1	1	525.915	1575.73	1575.72	3.84	0.00202	102856	HCD (High Energy Collision Dissociation)	MS2	75.7757	60	6.9971	1715	20241018_FJ_VOLTA_MP_Easy15_45min_1891_DDA_200ng_11.raw	F3	3.53	1
FALSE	High	Sequest HT (A2)	Unambiguous	[K].QGVAEAAGKTKEGVLYVGSK.[T]		1	SYUA_HUMAN_P37840	SYUA_HUMAN_P37840	2	4	0.6459	0	1	1	498.776	1992.08	1992.08	2.72	0.00135	1.19314e+06	HCD (High Energy Collision Dissociation)	MS2	12.8279	60	9.7662	2798	20241018_FJ_VOLTA_MP_Easy15_45min_1891_DDA_200ng_7.raw	F7	3.53	1
FALSE	High	Sequest HT (A2)	Unambiguous	[K].DQLGKnEEGAPQEGILEDMPVdPdNEAYEMPSEEGYQDYEPEA.[-]	N6(Deamidated); D22(Oxidation); D24(Oxidation)	1	SYUA_HUMAN_P37840	SYUA_HUMAN_P37840	1	4		0.0195	3	3	1216.01	4861	4860.99	1.47	0.00179	759249	HCD (High Energy Collision Dissociation)	MS2	0	60	28.1613	11458	20241018_FJ_VOLTA_MP_Easy15_45min_1891_DDA_200ng_11.raw	F3	3.52	1
FALSE	High	Sequest HT (A2)	Unambiguous	[K].DQLGKnEEGAPQEGILEDmPVDPDNEAYEmPSEEGYQDYEPEA.[-]	N6(Deamidated); M19(Oxidation); M30(Oxidation)	1	SYUA_HUMAN_P37840	SYUA_HUMAN_P37840	1	4		0.0223	4	4	1216.01	4861	4860.99	1.47	0.00179	759249	HCD (High Energy Collision Dissociation)	MS2	0	60	28.1613	11458	20241018_FJ_VOLTA_MP_Easy15_45min_1891_DDA_200ng_11.raw	F3	3.51	1
FALSE	High	Sequest HT (A2)	Unambiguous	[K].TVEGAGSIAAATGFVK.[K]		1	SYUA_HUMAN_P37840	SYUA_HUMAN_P37840	0	2	0.6819	0	1	1	739.899	1478.79	1478.78	4.06	0.003	1.04806e+06	HCD (High Energy Collision Dissociation)	MS2	18.539	60	23.2895	9013	20241018_FJ_VOLTA_MP_Easy15_45min_1891_DDA_200ng_11.raw	F3	3.49	1
FALSE	High	Sequest HT (A2)	Unambiguous	[K].TKEQVTnVGGAVVTGVTAVAQK.[T]	N7(Deamidated)	1	SYUA_HUMAN_P37840	SYUA_HUMAN_P37840	1	4	0.0661	0	1	1	540.301	2158.18	2158.17	4.25	0.00229	312839	HCD (High Energy Collision Dissociation)	MS2	4.93437	60	20.25	7544	20241018_FJ_VOLTA_MP_Easy15_45min_1891_DDA_200ng_11.raw	F3	3.48	1
FALSE	High	Sequest HT (A2)	Unambiguous	[K].TKEGVVHGVATVAEK.[T]		1	SYUA_HUMAN_P37840	SYUA_HUMAN_P37840	1	3	0.6167	0	1	1	508.952	1524.84	1524.84	2.05	0.00104	486223	HCD (High Energy Collision Dissociation)	MS2	33.8228	60	6.4775	1269	20241018_FJ_VOLTA_MP_Easy15_45min_1891_DDA_200ng_4.raw	F10	3.47	1
FALSE	High	Sequest HT (A2)	Unambiguous	[K].DTGTIEIIAPLSGEIVNIEDVPDVVFAEK.[I]		1	P69783	P69783	0	3	0.7406	0	1	1	1028.54	3083.61	3083.6	3.42	0.00351	128810	HCD (High Energy Collision Dissociation)	MS2	0	60	36.379	15346	20241018_FJ_VOLTA_MP_Easy15_45min_1891_DDA_200ng_11.raw	F3	3.47	1
FALSE	High	Sequest HT (A2)	Unambiguous	[K].TKEGVLYVGSK.[T]		1	SYUA_HUMAN_P37840	SYUA_HUMAN_P37840	1	2	0.711	0	1	1	590.834	1180.66	1180.66	2.84	0.00168	9012808	HCD (High Energy Collision Dissociation)	MS2	0.789094	60	8.0299	2078	20241018_FJ_VOLTA_MP_Easy15_45min_1891_DDA_200ng_7.raw	F7	3.46	1
FALSE	High	Sequest HT (A2)	Unambiguous	[K].TKEGvvHGVATVAEK.[T]	V5(Oxidation); V6(Oxidation)	1	SYUA_HUMAN_P37840	SYUA_HUMAN_P37840	1	3	0.1098	0	1	1	519.618	1556.84	1556.83	7.64	0.00396	3.52803e+06	HCD (High Energy Collision Dissociation)	MS2	35.0726	60	9.5729	2872	20241018_FJ_VOLTA_MP_Easy15_45min_1891_DDA_200ng_11.raw	F3	3.46	1
FALSE	High	Sequest HT (A2)	Unambiguous	[K].TKEQVTNVGGAVVTGVTAVAQK.[T]		1	SYUA_HUMAN_P37840	SYUA_HUMAN_P37840	1	3	1	0	1	1	719.736	2157.19	2157.19	2.34	0.00168	308491	HCD (High Energy Collision Dissociation)	MS2	2.6059	60	19.4158	7213	20241018_FJ_VOLTA_MP_Easy15_45min_1891_DDA_200ng_12.raw	F2	3.45	1
FALSE	High	Sequest HT (A2)	Unambiguous	[K].DQLGKNEEGAPqEGILEDMpVDpDNEAYEMPSEEGYQDYEPEA.[-]	Q12(Deamidated); P20(Oxidation); P23(Oxidation)	1	SYUA_HUMAN_P37840	SYUA_HUMAN_P37840	1	4		0.039	5	5	1216.01	4861	4860.99	1.47	0.00179	759249	HCD (High Energy Collision Dissociation)	MS2	0	60	28.1613	11458	20241018_FJ_VOLTA_MP_Easy15_45min_1891_DDA_200ng_11.raw	F3	3.45	1
FALSE	High	Sequest HT (A2)	Unambiguous	[K].DQLGKNEEGAPqEGILEDMPvDPDNEAyEMPSEEGYQDYEPEA.[-]	Q12(Deamidated); V21(Oxidation); Y28(Oxidation)	1	SYUA_HUMAN_P37840	SYUA_HUMAN_P37840	1	4		0.039	5	6	1216.01	4861	4860.99	1.47	0.00179	759249	HCD (High Energy Collision Dissociation)	MS2	0	60	28.1613	11458	20241018_FJ_VOLTA_MP_Easy15_45min_1891_DDA_200ng_11.raw	F3	3.45	1
FALSE	High	Sequest HT (A2)	Unambiguous	[K].EGVVHGVATVAEK.[T]		1	SYUA_HUMAN_P37840	SYUA_HUMAN_P37840	0	2	0.282	0	1	1	648.354	1295.7	1295.7	3.74	0.00243	1144240	HCD (High Energy Collision Dissociation)	MS2	0	60	8.7861	2503	20241018_FJ_VOLTA_MP_Easy15_45min_1891_DDA_200ng_11.raw	F3	3.44	1
FALSE	High	Sequest HT (A2)	Unambiguous	[K].EGVVHGVATVAEK.[T]		1	SYUA_HUMAN_P37840	SYUA_HUMAN_P37840	0	3	0.5029	0	1	1	432.571	1295.7	1295.7	2.39	0.00103	944525	HCD (High Energy Collision Dissociation)	MS2	10.7606	60	10.5296	2990	20241018_FJ_VOLTA_MP_Easy15_45min_1891_DDA_200ng_9.raw	F5	3.44	1
FALSE	High	Sequest HT (A2)	Unambiguous	[K].AKEGVVAAAEK.[T]		1	SYUA_HUMAN_P37840	SYUA_HUMAN_P37840	1	2	0.5698	0	1	1	536.804	1072.6	1072.6	1.21	0.00065	18532108	HCD (High Energy Collision Dissociation)	MS2	1.56541	60	6.1443	1116	20241018_FJ_VOLTA_MP_Easy15_45min_1891_DDA_200ng_8.raw	F6	3.44	1
FALSE	High	Sequest HT (A2)	Unambiguous	[K].EQVTNVGGAVVTGVTAVAQK.[T]		1	SYUA_HUMAN_P37840	SYUA_HUMAN_P37840	0	3	0.7836	0	1	1	643.355	1928.05	1928.04	2.93	0.00189	399672	HCD (High Energy Collision Dissociation)	MS2	3.85118	60	21.9321	7891	20241018_FJ_VOLTA_MP_Easy15_45min_1891_DDA_200ng_7.raw	F7	3.42	1
FALSE	High	Sequest HT (A2)	Unambiguous	[K].AKEGVVAAAEK.[T]		1	SYUA_HUMAN_P37840	SYUA_HUMAN_P37840	1	2	0.5936	0	1	1	536.804	1072.6	1072.6	0.19	0.0001	10506112	HCD (High Energy Collision Dissociation)	MS2	2.97923	60	6.1547	1087	20241018_FJ_VOLTA_MP_Easy15_45min_1891_DDA_200ng_10.raw	F4	3.42	1
FALSE	High	Sequest HT (A2)	Unambiguous	[K].NEEGAPQEGILEDMpVDpDnEAYEMPSEEGYQDYEPEA.[-]	P15(Oxidation); P18(Oxidation); N20(Deamidated)	1	SYUA_HUMAN_P37840	SYUA_HUMAN_P37840	0	3		0.0367	2	2	1440.58	4319.72	4319.71	2.77	0.00399	1.31417e+06	HCD (High Energy Collision Dissociation)	MS2	0	60	29.4928	12167	20241018_FJ_VOLTA_MP_Easy15_45min_1891_DDA_200ng_12.raw	F2	3.41	1
FALSE	High	Sequest HT (A2)	Unambiguous	[K].EGVVHGVATVAEK.[T]		1	SYUA_HUMAN_P37840	SYUA_HUMAN_P37840	0	3	0.5601	0	1	1	432.571	1295.7	1295.7	2.89	0.00125	722236	HCD (High Energy Collision Dissociation)	MS2	10.3761	60	22.3438	4581	20241018_FJ_VOLTA_MP_Easy15_45min_1891_DDA_200ng_1_241018150029.raw	F13	3.41	1
FALSE	High	Sequest HT (A2)	Unambiguous	[K].NEEGAPQEGILEDMPvDPDnEAyEMPSEEGYQDYEPEA.[-]	V16(Oxidation); N20(Deamidated); Y23(Oxidation)	1	SYUA_HUMAN_P37840	SYUA_HUMAN_P37840	0	3		0.0367	2	3	1440.58	4319.72	4319.71	2.77	0.00399	1.31417e+06	HCD (High Energy Collision Dissociation)	MS2	0	60	29.4928	12167	20241018_FJ_VOLTA_MP_Easy15_45min_1891_DDA_200ng_12.raw	F2	3.41	1
FALSE	High	Sequest HT (A2)	Unambiguous	[K].TVEGAGSIAAATGfVK.[K]	F14(Oxidation)	1	SYUA_HUMAN_P37840	SYUA_HUMAN_P37840	0	2	0.0294	0	1	1	747.894	1494.78	1494.78	1.21	0.00091	985471	HCD (High Energy Collision Dissociation)	MS2	29.8366	60	23.7363	6948	20241018_FJ_VOLTA_MP_Easy15_45min_1891_DDA_200ng_2.raw	F12	3.4	1
FALSE	High	Sequest HT (A2)	Unambiguous	[K].EGVVHGVATVAEK.[T]		1	SYUA_HUMAN_P37840	SYUA_HUMAN_P37840	0	3	0.5251	0	1	1	432.572	1295.7	1295.7	3.88	0.00167	5655554	HCD (High Energy Collision Dissociation)	MS2	5.28611	60	8.0962	2102	20241018_FJ_VOLTA_MP_Easy15_45min_1891_DDA_200ng_7.raw	F7	3.39	1
FALSE	High	Sequest HT (A2)	Unambiguous	[K].KDqLGKNEEGAPqEGILEDMPvDPDNEAyEMPSEEGYQDYEPEA.[-]	Q3(Deamidated); Q13(Deamidated); V22(Oxidation); Y29(Oxidation)	1	SYUA_HUMAN_P37840	SYUA_HUMAN_P37840	2	4	0.003	0	1	1	1248.28	4990.09	4990.07	2.83	0.00353	571249	HCD (High Energy Collision Dissociation)	MS2	0	60	26.0528	10385	20241018_FJ_VOLTA_MP_Easy15_45min_1891_DDA_200ng_11.raw	F3	3.38	1
FALSE	High	Sequest HT (A2)	Unambiguous	[K].KDqLGKNEEGAPqEGILEDmPVDPDNEAYEmPSEEGYQDYEPEA.[-]	Q3(Deamidated); Q13(Deamidated); M20(Oxidation); M31(Oxidation)	1	SYUA_HUMAN_P37840	SYUA_HUMAN_P37840	2	4		0.003	2	2	1248.28	4990.09	4990.07	2.83	0.00353	571249	HCD (High Energy Collision Dissociation)	MS2	0	60	26.0528	10385	20241018_FJ_VOLTA_MP_Easy15_45min_1891_DDA_200ng_11.raw	F3	3.37	1
FALSE	High	Sequest HT (A2)	Unambiguous	[K].TKEQVTNVGGAVVTGVTAVAQK.[T]		1	SYUA_HUMAN_P37840	SYUA_HUMAN_P37840	1	3	0.7982	0	1	1	719.736	2157.19	2157.19	2.34	0.00168	219351	HCD (High Energy Collision Dissociation)	MS2	6.36161	60	19.4263	6717	20241018_FJ_VOLTA_MP_Easy15_45min_1891_DDA_200ng_8.raw	F6	3.37	1
FALSE	High	Sequest HT (A2)	Unambiguous	[K].EQVTnVGGAVVTGVTAVAQK.[T]	N5(Deamidated)	1	SYUA_HUMAN_P37840	SYUA_HUMAN_P37840	0	2	0.3363	0	1	1	965.02	1929.03	1929.03	1.96	0.00189	607713	HCD (High Energy Collision Dissociation)	MS2	20.1965	60	24.7202	9185	20241018_FJ_VOLTA_MP_Easy15_45min_1891_DDA_200ng_7.raw	F7	3.36	1
FALSE	High	Sequest HT (A2)	Unambiguous	[K].SAGGIVLTGSAAAK.[S]		1	B1XDP6	B1XDP6	0	2	0.7194	0	1	1	601.84	1202.67	1202.67	-0.45	-0.00027	582449	HCD (High Energy Collision Dissociation)	MS2	12.3555	60	11.2218	2932	20241018_FJ_VOLTA_MP_Easy15_45min_1891_DDA_200ng_4.raw	F10	3.35	1
FALSE	High	Sequest HT (A2)	Unambiguous	[K].AKEGVVAAAEK.[T]		1	SYUA_HUMAN_P37840	SYUA_HUMAN_P37840	1	2	0.606	0	1	1	536.804	1072.6	1072.6	0.42	0.00022	9278328	HCD (High Energy Collision Dissociation)	MS2	2.13287	60	6.1497	1079	20241018_FJ_VOLTA_MP_Easy15_45min_1891_DDA_200ng_6.raw	F8	3.35	1
FALSE	High	Sequest HT (A2)	Unambiguous	[K].TKEGVVHGVATVAEK.[T]		1	SYUA_HUMAN_P37840	SYUA_HUMAN_P37840	1	3	0.7327	0	1	1	508.953	1524.84	1524.84	4.15	0.00211	830078	HCD (High Energy Collision Dissociation)	MS2	29.1372	60	6.8521	1566	20241018_FJ_VOLTA_MP_Easy15_45min_1891_DDA_200ng_7.raw	F7	3.33	1
FALSE	High	Sequest HT (A2)	Unambiguous	[K].TKEGVVHGVATVAEK.[T]		1	SYUA_HUMAN_P37840	SYUA_HUMAN_P37840	1	3	0.7117	0	1	1	508.952	1524.84	1524.84	2.53	0.00129	444058	HCD (High Energy Collision Dissociation)	MS2	1.81442	60	6.2957	1170	20241018_FJ_VOLTA_MP_Easy15_45min_1891_DDA_200ng_3.raw	F11	3.33	1
FALSE	High	Sequest HT (A2)	Unambiguous	[K].TKEGVVHGVATVAEK.[T]		1	SYUA_HUMAN_P37840	SYUA_HUMAN_P37840	1	2	0.7108	0	1	1	762.922	1524.84	1524.84	-1.02	-0.00078	452100	HCD (High Energy Collision Dissociation)	MS2	49.7565	60	6.4514	1241	20241018_FJ_VOLTA_MP_Easy15_45min_1891_DDA_200ng_10.raw	F4	3.32	1
FALSE	High	Sequest HT (A2)	Unambiguous	[K].AKEGVVAAAEK.[T]		1	SYUA_HUMAN_P37840	SYUA_HUMAN_P37840	1	3	0.5241	0	1	1	358.205	1072.6	1072.6	1.09	0.00039	13877751	HCD (High Energy Collision Dissociation)	MS2	6.28152	60	6.1512	1093	20241018_FJ_VOLTA_MP_Easy15_45min_1891_DDA_200ng_3.raw	F11	3.32	1
FALSE	High	Sequest HT (A2)	Unambiguous	[K].TKEQVTNVGGAVVTGVTAVAQK.[T]		1	SYUA_HUMAN_P37840	SYUA_HUMAN_P37840	1	3	1	0	1	1	719.735	2157.19	2157.19	1.57	0.00113	532573	HCD (High Energy Collision Dissociation)	MS2	2.58132	60	19.2181	5409	20241018_FJ_VOLTA_MP_Easy15_45min_1891_DDA_200ng_2.raw	F12	3.32	1
FALSE	High	Sequest HT (A2)	Unambiguous	[K].TKEGVVHGVATVAEK.[T]		1	SYUA_HUMAN_P37840	SYUA_HUMAN_P37840	1	4	0.3958	0	1	1	381.966	1524.84	1524.84	1.76	0.00067	2.10135e+06	HCD (High Energy Collision Dissociation)	MS2	2.52511	60	6.8158	1622	20241018_FJ_VOLTA_MP_Easy15_45min_1891_DDA_200ng_11.raw	F3	3.31	1
FALSE	High	Sequest HT (A2)	Unambiguous	[K].TVEGAGSIAAATGFvK.[K]	V15(Oxidation)	1	SYUA_HUMAN_P37840	SYUA_HUMAN_P37840	0	2		0.0294	2	2	747.894	1494.78	1494.78	1.21	0.00091	985471	HCD (High Energy Collision Dissociation)	MS2	29.8366	60	23.7363	6948	20241018_FJ_VOLTA_MP_Easy15_45min_1891_DDA_200ng_2.raw	F12	3.3	1
FALSE	High	Sequest HT (A2)	Unambiguous	[K].NEEGAPQEGILeDMPVDPDneAYeMPSEEGYQDYEPEA.[-]	E12(Oxidation); N20(Deamidated); E21(Oxidation); E24(Oxidation)	1	SYUA_HUMAN_P37840	SYUA_HUMAN_P37840	0	3	0.0121	0	1	1	1445.91	4335.73	4335.7	6.24	0.00903	853534	HCD (High Energy Collision Dissociation)	MS2	0	60	29.5519	12186	20241018_FJ_VOLTA_MP_Easy15_45min_1891_DDA_200ng_11.raw	F3	3.3	1
FALSE	High	Sequest HT (A2)	Unambiguous	[K].TKEGVVHGVATVAEK.[T]		1	SYUA_HUMAN_P37840	SYUA_HUMAN_P37840	1	4	0.5636	0	1	1	381.965	1524.84	1524.84	-0.64	-0.00024	583054	HCD (High Energy Collision Dissociation)	MS2	7.72394	60	6.439	1246	20241018_FJ_VOLTA_MP_Easy15_45min_1891_DDA_200ng_3.raw	F11	3.3	1
FALSE	High	Sequest HT (A2)	Unambiguous	[K].TVEGAGSIAAATGFVK.[K]		1	SYUA_HUMAN_P37840	SYUA_HUMAN_P37840	0	2	0.6231	0	1	1	739.896	1478.79	1478.78	0.43	0.00032	580548	HCD (High Energy Collision Dissociation)	MS2	0	60	20.8441	6096	20241018_FJ_VOLTA_MP_Easy15_45min_1891_DDA_200ng_4.raw	F10	3.29	1
FALSE	High	Sequest HT (A2)	Unambiguous	[K].TKEGVVHGVATVAEK.[T]		1	SYUA_HUMAN_P37840	SYUA_HUMAN_P37840	1	3	0.6738	0	1	1	508.952	1524.84	1524.84	2.89	0.00147	408553	HCD (High Energy Collision Dissociation)	MS2	16.4939	60	6.8005	1395	20241018_FJ_VOLTA_MP_Easy15_45min_1891_DDA_200ng_13.raw	F1	3.28	1
FALSE	High	Sequest HT (A2)	Unambiguous	[K].TKEGVVHGVATVAEK.[T]		1	SYUA_HUMAN_P37840	SYUA_HUMAN_P37840	1	3	0.5352	0	1	1	508.952	1524.84	1524.84	2.29	0.00116	1749721	HCD (High Energy Collision Dissociation)	MS2	32.3648	60	6.8452	1451	20241018_FJ_VOLTA_MP_Easy15_45min_1891_DDA_200ng_9.raw	F5	3.27	1
FALSE	High	Sequest HT (A2)	Unambiguous	[K].EqVTNVGGAVVTGVTAVAqK.[T]	Q2(Deamidated); Q19(Deamidated)	1	SYUA_HUMAN_P37840	SYUA_HUMAN_P37840	0	3	0.7462	0	1	1	644.011	1930.02	1930.01	2.64	0.0017	466335	HCD (High Energy Collision Dissociation)	MS2	1.10274	60	25.2145	7669	20241018_FJ_VOLTA_MP_Easy15_45min_1891_DDA_200ng_4.raw	F10	3.27	1
FALSE	High	Sequest HT (A2)	Unambiguous	[K].TKEGVLYVGSK.[T]		1	SYUA_HUMAN_P37840	SYUA_HUMAN_P37840	1	3	0.4816	0	1	1	394.225	1180.66	1180.66	2.91	0.00114	4383771	HCD (High Energy Collision Dissociation)	MS2	2.67646	60	8.2793	2080	20241018_FJ_VOLTA_MP_Easy15_45min_1891_DDA_200ng_9.raw	F5	3.26	1
FALSE	High	Sequest HT (A2)	Unambiguous	[K].NEEGAPQEGILEdMPVdPdnEAYEMPSEEGYQDYEPEA.[-]	D13(Oxidation); D17(Oxidation); D19(Oxidation); N20(Deamidated)	1	SYUA_HUMAN_P37840	SYUA_HUMAN_P37840	0	3		0.0121	2	2	1445.91	4335.73	4335.7	6.24	0.00903	853534	HCD (High Energy Collision Dissociation)	MS2	0	60	29.5519	12186	20241018_FJ_VOLTA_MP_Easy15_45min_1891_DDA_200ng_11.raw	F3	3.26	1
FALSE	High	Sequest HT (A2)	Unambiguous	[K].KDqLGKNEEGAPqEGILEDMPvDPDNEAYEMPsEEGYQDYEPEA.[-]	Q3(Deamidated); Q13(Deamidated); V22(Oxidation); S33(Oxidation)	1	SYUA_HUMAN_P37840	SYUA_HUMAN_P37840	2	4		0.0355	3	3	1248.28	4990.09	4990.07	2.83	0.00353	571249	HCD (High Energy Collision Dissociation)	MS2	0	60	26.0528	10385	20241018_FJ_VOLTA_MP_Easy15_45min_1891_DDA_200ng_11.raw	F3	3.26	1
FALSE	High	Sequest HT (A2)	Unambiguous	[K].EQVTNVGGAVVTGVTAVAQK.[T]		1	SYUA_HUMAN_P37840	SYUA_HUMAN_P37840	0	3	0.6892	0	1	1	643.354	1928.05	1928.04	1.32	0.00085	329812	HCD (High Energy Collision Dissociation)	MS2	25.6161	60	23.3719	6802	20241018_FJ_VOLTA_MP_Easy15_45min_1891_DDA_200ng_2.raw	F12	3.25	1
FALSE	High	Sequest HT (A2)	Unambiguous	[K].EQVTnVGGAVVTGVTAVAQK.[T]	N5(Deamidated)	1	SYUA_HUMAN_P37840	SYUA_HUMAN_P37840	0	2	0.0864	0	1	1	965.02	1929.03	1929.03	1.64	0.00158	701849	HCD (High Energy Collision Dissociation)	MS2	6.25293	60	24.3603	8888	20241018_FJ_VOLTA_MP_Easy15_45min_1891_DDA_200ng_9.raw	F5	3.24	1
FALSE	High	Sequest HT (A2)	Unambiguous	[K].TVEGAGSIAAATGFVk.[K]	K16(Oxidation)	1	SYUA_HUMAN_P37840	SYUA_HUMAN_P37840	0	2		0.0471	3	3	747.894	1494.78	1494.78	1.21	0.00091	985471	HCD (High Energy Collision Dissociation)	MS2	29.8366	60	23.7363	6948	20241018_FJ_VOLTA_MP_Easy15_45min_1891_DDA_200ng_2.raw	F12	3.24	1
FALSE	High	Sequest HT (A2)	Unambiguous	[K].EGVVHGVATVAEK.[T]		1	SYUA_HUMAN_P37840	SYUA_HUMAN_P37840	0	2	0.356	0	1	1	648.352	1295.7	1295.7	1.39	0.0009	941604	HCD (High Energy Collision Dissociation)	MS2	2.20994	60	21.4	4105	20241018_FJ_VOLTA_MP_Easy15_45min_1891_DDA_200ng_1_241018150029.raw	F13	3.23	1
FALSE	High	Sequest HT (A2)	Unambiguous	[K].EQVTNVGGAVVTGVTAVAQK.[T]		1	SYUA_HUMAN_P37840	SYUA_HUMAN_P37840	0	3	0.709	0	1	1	643.355	1928.05	1928.04	2.65	0.0017	361561	HCD (High Energy Collision Dissociation)	MS2	13.865	60	25.3642	6060	20241018_FJ_VOLTA_MP_Easy15_45min_1891_DDA_200ng_1_241018150029.raw	F13	3.23	1
FALSE	High	Sequest HT (A2)	Unambiguous	[K].DTGTIEIIAPLSGEIVNIEDVPDVVFAEK.[I]		1	P69783	P69783	0	3	0.6533	0	1	1	1028.54	3083.61	3083.6	2.7	0.00278	61862.9	HCD (High Energy Collision Dissociation)	MS2	20.023	60	36.4548	15649	20241018_FJ_VOLTA_MP_Easy15_45min_1891_DDA_200ng_12.raw	F2	3.23	1
FALSE	High	Sequest HT (A2)	Unambiguous	[K].TKEGVVHGVATVAEK.[T]		1	SYUA_HUMAN_P37840	SYUA_HUMAN_P37840	1	4	0.528	0	1	1	381.964	1524.83	1524.84	-2	-0.00076	700279	HCD (High Energy Collision Dissociation)	MS2	0	60	6.4366	1270	20241018_FJ_VOLTA_MP_Easy15_45min_1891_DDA_200ng_8.raw	F6	3.22	1
FALSE	High	Sequest HT (A2)	Unambiguous	[K].TKEGVLYVGSK.[T]		1	SYUA_HUMAN_P37840	SYUA_HUMAN_P37840	1	3	0.5078	0	1	1	394.225	1180.66	1180.66	3.76	0.00148	6.79295e+06	HCD (High Energy Collision Dissociation)	MS2	2.74907	60	8.166	2129	20241018_FJ_VOLTA_MP_Easy15_45min_1891_DDA_200ng_7.raw	F7	3.21	1
FALSE	High	Sequest HT (A2)	Unambiguous	[K].EqVTNVGGAVVTGVTAVAQK.[T]	Q2(Deamidated)	1	SYUA_HUMAN_P37840	SYUA_HUMAN_P37840	0	3	0.0313	0	1	1	643.682	1929.03	1929.03	1.98	0.00127	936143	HCD (High Energy Collision Dissociation)	MS2	0.968618	60	24.0131	7523	20241018_FJ_VOLTA_MP_Easy15_45min_1891_DDA_200ng_3.raw	F11	3.19	1
FALSE	High	Sequest HT (A2)	Unambiguous	[R].ILEnGEVKPLDVK.[V]	N4(Deamidated)	1	B1XDP6	B1XDP6	0	3	0.6959	0	1	1	485.61	1454.82	1454.81	3.65	0.00177	1.90445e+06	HCD (High Energy Collision Dissociation)	MS2	21.1279	60	13.9006	4782	20241018_FJ_VOLTA_MP_Easy15_45min_1891_DDA_200ng_11.raw	F3	3.19	1
FALSE	High	Sequest HT (A2)	Unambiguous	[K].EQVTNVGGAVVTGVTAVAQK.[T]		1	SYUA_HUMAN_P37840	SYUA_HUMAN_P37840	0	3	0.7075	0	1	1	643.355	1928.05	1928.04	2.84	0.00182	449391	HCD (High Energy Collision Dissociation)	MS2	6.98621	60	19.9853	7023	20241018_FJ_VOLTA_MP_Easy15_45min_1891_DDA_200ng_7.raw	F7	3.18	1
FALSE	High	Sequest HT (A2)	Unambiguous	[K].TKEGVLYVGSK.[T]		1	SYUA_HUMAN_P37840	SYUA_HUMAN_P37840	1	3	0.5503	0	1	1	394.225	1180.66	1180.66	3.61	0.00142	2.07106e+06	HCD (High Energy Collision Dissociation)	MS2	4.7863	60	9.1161	2661	20241018_FJ_VOLTA_MP_Easy15_45min_1891_DDA_200ng_11.raw	F3	3.18	1
FALSE	High	Sequest HT (A2)	Unambiguous	[K].TKEQvTNVGGAVVTGVTAVAQK.[T]	V5(Oxidation)	1	SYUA_HUMAN_P37840	SYUA_HUMAN_P37840	1	3	0.0283	0	1	1	725.064	2173.18	2173.18	-2.61	-0.00189	536236	HCD (High Energy Collision Dissociation)	MS2	13.8383	60	19.3516	6676	20241018_FJ_VOLTA_MP_Easy15_45min_1891_DDA_200ng_9.raw	F5	3.18	1
FALSE	High	Sequest HT (A2)	Unambiguous	[K].TKEqVTNVGGAVVTGVTAVAQK.[T]	Q4(Oxidation)	1	SYUA_HUMAN_P37840	SYUA_HUMAN_P37840	1	3	0.0283	0	1	2	725.064	2173.18	2173.18	-2.61	-0.00189	536236	HCD (High Energy Collision Dissociation)	MS2	13.8383	60	19.3516	6676	20241018_FJ_VOLTA_MP_Easy15_45min_1891_DDA_200ng_9.raw	F5	3.18	1
FALSE	High	Sequest HT (A2)	Unambiguous	[K].TKEQVTnVGGAVVTGVTAVAQK.[T]	N7(Deamidated)	1	SYUA_HUMAN_P37840	SYUA_HUMAN_P37840	1	4	0.0723	0	1	1	540.3	2158.18	2158.17	3.35	0.00181	439190	HCD (High Energy Collision Dissociation)	MS2	2.25708	60	20.529	7210	20241018_FJ_VOLTA_MP_Easy15_45min_1891_DDA_200ng_9.raw	F5	3.18	1
FALSE	High	Sequest HT (A2)	Unambiguous	[K].TKEqVTnVGGAVVTGVTAVAQK.[T]	Q4(Deamidated); N7(Deamidated)	1	SYUA_HUMAN_P37840	SYUA_HUMAN_P37840	1	3	0.5962	0	1	1	720.391	2159.16	2159.16	0.97	0.0007	509268	HCD (High Energy Collision Dissociation)	MS2	3.17937	60	20.6516	5600	20241018_FJ_VOLTA_MP_Easy15_45min_1891_DDA_200ng_6.raw	F8	3.17	1
FALSE	High	Sequest HT (A2)	Unambiguous	[K].TKEQVTNVGGAVVTGVtAVAQK.[T]	T17(Oxidation)	1	SYUA_HUMAN_P37840	SYUA_HUMAN_P37840	1	3	0.0601	0	1	1	725.06	2173.17	2173.18	-7.16	-0.00519	448176	HCD (High Energy Collision Dissociation)	MS2	19.7034	60	15.2745	5041	20241018_FJ_VOLTA_MP_Easy15_45min_1891_DDA_200ng_9.raw	F5	3.16	1
FALSE	High	Sequest HT (A2)	Unambiguous	[K].TKEQVTNVGGAVVTGVTAvAQK.[T]	V19(Oxidation)	1	SYUA_HUMAN_P37840	SYUA_HUMAN_P37840	1	3	0.0601	0	1	2	725.06	2173.17	2173.18	-7.16	-0.00519	448176	HCD (High Energy Collision Dissociation)	MS2	19.7034	60	15.2745	5041	20241018_FJ_VOLTA_MP_Easy15_45min_1891_DDA_200ng_9.raw	F5	3.16	1
FALSE	High	Sequest HT (A2)	Unambiguous	[K].TKEQVTNVGGAVVTGVTAVAQK.[T]		1	SYUA_HUMAN_P37840	SYUA_HUMAN_P37840	1	4	0.6867	0	1	1	540.052	2157.19	2157.19	-0.55	-0.0003	298982	HCD (High Energy Collision Dissociation)	MS2	19.5709	60	17.7336	6127	20241018_FJ_VOLTA_MP_Easy15_45min_1891_DDA_200ng_7.raw	F7	3.16	1
FALSE	High	Sequest HT (A2)	Unambiguous	[K].EGVVHGVATVAEK.[T]		1	SYUA_HUMAN_P37840	SYUA_HUMAN_P37840	0	3	0.519	0	1	1	432.569	1295.69	1295.7	-1.35	-0.00058	3.67628e+06	HCD (High Energy Collision Dissociation)	MS2	2.63195	60	7.8037	1667	20241018_FJ_VOLTA_MP_Easy15_45min_1891_DDA_200ng_2.raw	F12	3.16	1
FALSE	High	Sequest HT (A2)	Unambiguous	[K].NEEGAPQEGILEDMPvDPDnEAyEMPsEEGYQDYEPEA.[-]	V16(Oxidation); N20(Deamidated); Y23(Oxidation); S27(Oxidation)	1	SYUA_HUMAN_P37840	SYUA_HUMAN_P37840	0	3		0.0485	3	3	1445.91	4335.73	4335.7	6.24	0.00903	853534	HCD (High Energy Collision Dissociation)	MS2	0	60	29.5519	12186	20241018_FJ_VOLTA_MP_Easy15_45min_1891_DDA_200ng_11.raw	F3	3.14	1
FALSE	High	Sequest HT (A2)	Unambiguous	[K].TKEQVTNVGGAVVTGVTAVAQK.[T]		1	SYUA_HUMAN_P37840	SYUA_HUMAN_P37840	1	3	0.7452	0	1	1	719.737	2157.2	2157.19	3.87	0.00278	190462	HCD (High Energy Collision Dissociation)	MS2	21.2061	60	22.7492	8746	20241018_FJ_VOLTA_MP_Easy15_45min_1891_DDA_200ng_11.raw	F3	3.14	1
FALSE	High	Sequest HT (A2)	Unambiguous	[K].EGVVAAAEK.[T]		1	SYUA_HUMAN_P37840	SYUA_HUMAN_P37840	0	2	0.5673	0	1	1	437.239	873.47	873.468	2.74	0.0012	11931314	HCD (High Energy Collision Dissociation)	MS2	7.38236	60	6.8574	1644	20241018_FJ_VOLTA_MP_Easy15_45min_1891_DDA_200ng_11.raw	F3	3.12	1
FALSE	High	Sequest HT (A2)	Unambiguous	[K].TKEQVTNVGGAVVTGVTAVAQK.[T]		1	SYUA_HUMAN_P37840	SYUA_HUMAN_P37840	1	4	0.6849	0	1	1	540.054	2157.2	2157.19	3.86	0.00208	304080	HCD (High Energy Collision Dissociation)	MS2	4.39601	60	24.7615	5782	20241018_FJ_VOLTA_MP_Easy15_45min_1891_DDA_200ng_1_241018150029.raw	F13	3.11	1
FALSE	High	Sequest HT (A2)	Unambiguous	[K].TVEGAGSIAAATGfVK.[K]	F14(Oxidation)	1	SYUA_HUMAN_P37840	SYUA_HUMAN_P37840	0	2	0.029	0	1	1	747.895	1494.78	1494.78	2.28	0.0017	358442	HCD (High Energy Collision Dissociation)	MS2	15.179	60	23.3894	5945	20241018_FJ_VOLTA_MP_Easy15_45min_1891_DDA_200ng_13.raw	F1	3.1	1
FALSE	High	Sequest HT (A2)	Unambiguous	[K].EGVVAAAEK.[T]		1	SYUA_HUMAN_P37840	SYUA_HUMAN_P37840	0	2	0.5548	0	1	1	437.239	873.471	873.468	3.65	0.00159	3.08335e+06	HCD (High Energy Collision Dissociation)	MS2	8.3187	60	6.8168	1548	20241018_FJ_VOLTA_MP_Easy15_45min_1891_DDA_200ng_7.raw	F7	3.1	1
FALSE	High	Sequest HT (A2)	Unambiguous	[K].AKEGVVAAAEK.[T]		1	SYUA_HUMAN_P37840	SYUA_HUMAN_P37840	1	2	0.5742	0	1	1	536.805	1072.6	1072.6	2.01	0.00108	11998336	HCD (High Energy Collision Dissociation)	MS2	1.95303	60	6.1559	1096	20241018_FJ_VOLTA_MP_Easy15_45min_1891_DDA_200ng_3.raw	F11	3.1	1
FALSE	High	Sequest HT (A2)	Unambiguous	[K].EQVTNVGGAVVTGVTAVAQK.[T]		1	SYUA_HUMAN_P37840	SYUA_HUMAN_P37840	0	3	0.7249	0	1	1	643.354	1928.05	1928.04	1.32	0.00085	474651	HCD (High Energy Collision Dissociation)	MS2	7.56464	60	22.2281	6415	20241018_FJ_VOLTA_MP_Easy15_45min_1891_DDA_200ng_2.raw	F12	3.09	1
FALSE	High	Sequest HT (A2)	Unambiguous	[K].TKeQVTNVGGAVVTGVTAVAQK.[T]	E3(Oxidation)	1	SYUA_HUMAN_P37840	SYUA_HUMAN_P37840	1	3		0.0283	3	3	725.064	2173.18	2173.18	-2.61	-0.00189	536236	HCD (High Energy Collision Dissociation)	MS2	13.8383	60	19.3516	6676	20241018_FJ_VOLTA_MP_Easy15_45min_1891_DDA_200ng_9.raw	F5	3.09	1
FALSE	High	Sequest HT (A2)	Unambiguous	[K].TKEQVTnVGGAVVTGVTAVAQK.[T]	N7(Oxidation)	1	SYUA_HUMAN_P37840	SYUA_HUMAN_P37840	1	3		0.0283	3	4	725.064	2173.18	2173.18	-2.61	-0.00189	536236	HCD (High Energy Collision Dissociation)	MS2	13.8383	60	19.3516	6676	20241018_FJ_VOLTA_MP_Easy15_45min_1891_DDA_200ng_9.raw	F5	3.09	1
FALSE	High	Sequest HT (A2)	Unambiguous	[K].TKEQVtNVGGAVVTGVTAVAQK.[T]	T6(Oxidation)	1	SYUA_HUMAN_P37840	SYUA_HUMAN_P37840	1	3		0.0283	3	5	725.064	2173.18	2173.18	-2.61	-0.00189	536236	HCD (High Energy Collision Dissociation)	MS2	13.8383	60	19.3516	6676	20241018_FJ_VOLTA_MP_Easy15_45min_1891_DDA_200ng_9.raw	F5	3.09	1
FALSE	High	Sequest HT (A2)	Unambiguous	[K].TKEQVTNvGGAVVTGVTAVAQK.[T]	V8(Oxidation)	1	SYUA_HUMAN_P37840	SYUA_HUMAN_P37840	1	3		0.0283	3	6	725.064	2173.18	2173.18	-2.61	-0.00189	536236	HCD (High Energy Collision Dissociation)	MS2	13.8383	60	19.3516	6676	20241018_FJ_VOLTA_MP_Easy15_45min_1891_DDA_200ng_9.raw	F5	3.09	1
FALSE	High	Sequest HT (A2)	Unambiguous	[K].EqVTNVGGAVVTGVTAVAqK.[T]	Q2(Deamidated); Q19(Deamidated)	1	SYUA_HUMAN_P37840	SYUA_HUMAN_P37840	0	2	0.6699	0	1	1	965.513	1930.02	1930.01	3.28	0.00316	856670	HCD (High Energy Collision Dissociation)	MS2	30.4235	60	25.7094	10214	20241018_FJ_VOLTA_MP_Easy15_45min_1891_DDA_200ng_11.raw	F3	3.09	1
FALSE	High	Sequest HT (A2)	Unambiguous	[K].EQVTnVGGAVVTGVTAVAQK.[T]	N5(Deamidated)	1	SYUA_HUMAN_P37840	SYUA_HUMAN_P37840	0	3		0.0313	2	2	643.682	1929.03	1929.03	1.98	0.00127	936143	HCD (High Energy Collision Dissociation)	MS2	0.968618	60	24.0131	7523	20241018_FJ_VOLTA_MP_Easy15_45min_1891_DDA_200ng_3.raw	F11	3.09	1
FALSE	High	Sequest HT (A2)	Unambiguous	[K].EGVVAAAEK.[T]		1	SYUA_HUMAN_P37840	SYUA_HUMAN_P37840	0	2	0.5487	0	1	1	437.237	873.467	873.468	-0.47	-0.00021	6.42271e+06	HCD (High Energy Collision Dissociation)	MS2	13.43	60	21.0124	3908	20241018_FJ_VOLTA_MP_Easy15_45min_1891_DDA_200ng_1_241018150029.raw	F13	3.08	1
FALSE	High	Sequest HT (A2)	Unambiguous	[K].ALEEAGAEVEVK.[-]		2	C5A0S6	C5A0S6; B7MRB2	0	2	0.6818	0	1	1	622.822	1244.64	1244.64	-0.28	-0.00018	1.73488e+06	HCD (High Energy Collision Dissociation)	MS2	4.03202	60	11.6853	3263	20241018_FJ_VOLTA_MP_Easy15_45min_1891_DDA_200ng_5.raw	F9	3.08	1
FALSE	High	Sequest HT (A2)	Unambiguous	[K].LSAEKTlNPrGVVGlFPANR.[V]	L7(Oxidation); R10(Deamidated); L15(Oxidation)	1	P13009	P13009	2	3	0.0584	0	1	1	724.729	2172.17	2172.18	-2.16	-0.00156	2.14706e+06	HCD (High Energy Collision Dissociation)	MS2	22.1477	60	18.3424	6293	20241018_FJ_VOLTA_MP_Easy15_45min_1891_DDA_200ng_9.raw	F5	3.08	1
FALSE	High	Sequest HT (A2)	Unambiguous	[K].LSAEKTLnPrGVVGlFPANR.[V]	N8(Oxidation); R10(Deamidated); L15(Oxidation)	1	P13009	P13009	2	3	0.0584	0	1	2	724.729	2172.17	2172.18	-2.16	-0.00156	2.14706e+06	HCD (High Energy Collision Dissociation)	MS2	22.1477	60	18.3424	6293	20241018_FJ_VOLTA_MP_Easy15_45min_1891_DDA_200ng_9.raw	F5	3.08	1
FALSE	High	Sequest HT (A2)	Unambiguous	[K].TKEGVLYVGSK.[T]		1	SYUA_HUMAN_P37840	SYUA_HUMAN_P37840	1	3	0.5114	0	1	1	394.225	1180.66	1180.66	1.82	0.00072	1.92537e+06	HCD (High Energy Collision Dissociation)	MS2	2.09014	60	8.1343	1809	20241018_FJ_VOLTA_MP_Easy15_45min_1891_DDA_200ng_13.raw	F1	3.07	1
FALSE	High	Sequest HT (A2)	Unambiguous	[K].TVEGAGSIAAATGFVK.[K]		1	SYUA_HUMAN_P37840	SYUA_HUMAN_P37840	0	2	0.6059	0	1	1	739.898	1478.79	1478.78	2	0.00148	1.17126e+06	HCD (High Energy Collision Dissociation)	MS2	0	60	21.2855	7488	20241018_FJ_VOLTA_MP_Easy15_45min_1891_DDA_200ng_8.raw	F6	3.07	1
FALSE	High	Sequest HT (A2)	Unambiguous	[K].EQVTNVGGAVVTGVTAVAqK.[T]	Q19(Deamidated)	1	SYUA_HUMAN_P37840	SYUA_HUMAN_P37840	0	2	0.7974	0	1	1	965.019	1929.03	1929.03	1.32	0.00128	682251	HCD (High Energy Collision Dissociation)	MS2	0	60	24.163	7279	20241018_FJ_VOLTA_MP_Easy15_45min_1891_DDA_200ng_4.raw	F10	3.06	1
FALSE	High	Sequest HT (A2)	Unambiguous	[K].TVEGAGSIAAATGFVK.[K]		1	SYUA_HUMAN_P37840	SYUA_HUMAN_P37840	0	2	0.7222	0	1	1	739.898	1478.79	1478.78	2.49	0.00184	1.22353e+06	HCD (High Energy Collision Dissociation)	MS2	1.60913	60	26.6449	6656	20241018_FJ_VOLTA_MP_Easy15_45min_1891_DDA_200ng_1_241018150029.raw	F13	3.06	1
FALSE	High	Sequest HT (A2)	Unambiguous	[K].TVEGAGSIAAATGFVK.[K]		1	SYUA_HUMAN_P37840	SYUA_HUMAN_P37840	0	2	0.6176	0	1	1	739.897	1478.79	1478.78	1.34	0.00099	1.0815e+06	HCD (High Energy Collision Dissociation)	MS2	3.49546	60	21.679	6622	20241018_FJ_VOLTA_MP_Easy15_45min_1891_DDA_200ng_3.raw	F11	3.06	1
FALSE	High	Sequest HT (A2)	Unambiguous	[K].EGVVAAAEKTK.[Q]		1	SYUA_HUMAN_P37840	SYUA_HUMAN_P37840	1	3	0.5049	0	1	1	368.208	1102.61	1102.61	-1.22	-0.00045	799719	HCD (High Energy Collision Dissociation)	MS2	17.9511	60	6.2572	1166	20241018_FJ_VOLTA_MP_Easy15_45min_1891_DDA_200ng_9.raw	F5	3.05	1
FALSE	High	Sequest HT (A2)	Unambiguous	[K].EGVVhGVATVAEK.[T]	H5(Oxidation)	1	SYUA_HUMAN_P37840	SYUA_HUMAN_P37840	0	2	0.0557	0	1	1	656.349	1311.69	1311.69	-0.43	-0.00028	1.09973e+06	HCD (High Energy Collision Dissociation)	MS2	0	60	11.8914	2974	20241018_FJ_VOLTA_MP_Easy15_45min_1891_DDA_200ng_2.raw	F12	3.05	1
FALSE	High	Sequest HT (A2)	Unambiguous	[K].EGVVHGVATVAEK.[T]		1	SYUA_HUMAN_P37840	SYUA_HUMAN_P37840	0	3	0.5115	0	1	1	432.571	1295.7	1295.7	1.61	0.0007	2.13103e+06	HCD (High Energy Collision Dissociation)	MS2	3.80064	60	8.1331	2052	20241018_FJ_VOLTA_MP_Easy15_45min_1891_DDA_200ng_8.raw	F6	3.05	1
FALSE	High	Sequest HT (A2)	Unambiguous	[K].TKEQVTNVGGAVVTGVTAVAQKTVEGAGSIAAATGFVK.[K]		1	SYUA_HUMAN_P37840	SYUA_HUMAN_P37840	2	4	1	0	1	1	904.996	3616.96	3616.95	2.5	0.00226	152665	HCD (High Energy Collision Dissociation)	MS2	26.0047	60	32.246	12924	20241018_FJ_VOLTA_MP_Easy15_45min_1891_DDA_200ng_7.raw	F7	3.05	1
FALSE	High	Sequest HT (A2)	Unambiguous	[K].EQVTNVGGAVVTGVTAVAQK.[T]		1	SYUA_HUMAN_P37840	SYUA_HUMAN_P37840	0	3	0.7327	0	1	1	643.356	1928.05	1928.04	4.83	0.00311	283842	HCD (High Energy Collision Dissociation)	MS2	34.2875	60	22.5036	8684	20241018_FJ_VOLTA_MP_Easy15_45min_1891_DDA_200ng_12.raw	F2	3.03	1
FALSE	High	Sequest HT (A2)	Unambiguous	[K].TKEQVTNVGGAVVTGVTAVAQK.[T]		1	SYUA_HUMAN_P37840	SYUA_HUMAN_P37840	1	3	0.7195	0	1	1	719.736	2157.19	2157.19	3.44	0.00248	272845	HCD (High Energy Collision Dissociation)	MS2	80.574	60	19.5448	6842	20241018_FJ_VOLTA_MP_Easy15_45min_1891_DDA_200ng_7.raw	F7	3.03	1
FALSE	High	Sequest HT (A2)	Unambiguous	[K].TVEGAGSIAAATGFVK.[K]		1	SYUA_HUMAN_P37840	SYUA_HUMAN_P37840	0	2	0.6954	0	1	1	739.897	1478.79	1478.78	1.09	0.00081	634898	HCD (High Energy Collision Dissociation)	MS2	18.025	60	27.4467	11086	20241018_FJ_VOLTA_MP_Easy15_45min_1891_DDA_200ng_11.raw	F3	3.02	1
FALSE	High	Sequest HT (A2)	Unambiguous	[K].TKEGVVHGVATVAEK.[T]		1	SYUA_HUMAN_P37840	SYUA_HUMAN_P37840	1	4	0.4371	0	1	1	381.963	1524.83	1524.84	-4.48	-0.00171	223426	HCD (High Energy Collision Dissociation)	MS2	0	60	6.4344	1203	20241018_FJ_VOLTA_MP_Easy15_45min_1891_DDA_200ng_2.raw	F12	3.02	1
FALSE	High	Sequest HT (A2)	Unambiguous	[K].EGVVAAAEK.[T]		1	SYUA_HUMAN_P37840	SYUA_HUMAN_P37840	0	2	0.5828	0	1	1	437.239	873.47	873.468	2.53	0.00111	958186368	HCD (High Energy Collision Dissociation)	MS2	4.99805	21.758	21.06	3930	20241018_FJ_VOLTA_MP_Easy15_45min_1891_DDA_200ng_1_241018150029.raw	F13	3.02	1
FALSE	High	Sequest HT (A2)	Unambiguous	[K].TVEGAGSIAAATGFvK.[K]	V15(Oxidation)	1	SYUA_HUMAN_P37840	SYUA_HUMAN_P37840	0	2		0.029	2	2	747.895	1494.78	1494.78	2.28	0.0017	358442	HCD (High Energy Collision Dissociation)	MS2	15.179	60	23.3894	5945	20241018_FJ_VOLTA_MP_Easy15_45min_1891_DDA_200ng_13.raw	F1	3.01	1
FALSE	High	Sequest HT (A2)	Unambiguous	[K].ViLDGSVNLPEGTLSEDSGTLIFQGhPVIhASVSGSAPVSLnQK.[D]	I2(Oxidation); H26(Oxidation); H30(Oxidation); N42(Deamidated)	1	Q8CWC7	Q8CWC7	0	5	0.0199	0	1	1	904.671	4519.32	4519.28	8.92	0.00806	5.45224e+06	HCD (High Energy Collision Dissociation)	MS2	0.726913	60	30.9262	12915	20241018_FJ_VOLTA_MP_Easy15_45min_1891_DDA_200ng_12.raw	F2	3.01	1
FALSE	High	Sequest HT (A2)	Unambiguous	[K].ViLDGSVNLPEGTLSEDSGTLIFQGhPVIhASVSGSAPVSLNqK.[D]	I2(Oxidation); H26(Oxidation); H30(Oxidation); Q43(Deamidated)	1	Q8CWC7	Q8CWC7	0	5	0.0199	0	1	2	904.671	4519.32	4519.28	8.92	0.00806	5.45224e+06	HCD (High Energy Collision Dissociation)	MS2	0.726913	60	30.9262	12915	20241018_FJ_VOLTA_MP_Easy15_45min_1891_DDA_200ng_12.raw	F2	3.01	1
FALSE	High	Sequest HT (A2)	Unambiguous	[K].EQVTNVGGAVVTGVTAVAQK.[T]		1	SYUA_HUMAN_P37840	SYUA_HUMAN_P37840	0	3	0.7267	0	1	1	643.354	1928.05	1928.04	0.94	0.0006	665722	HCD (High Energy Collision Dissociation)	MS2	35.1351	60	22.9982	7123	20241018_FJ_VOLTA_MP_Easy15_45min_1891_DDA_200ng_3.raw	F11	3	1
FALSE	High	Sequest HT (A2)	Unambiguous	[K].TVEGAGSIAAATGFVK.[K]		1	SYUA_HUMAN_P37840	SYUA_HUMAN_P37840	0	2	0.6367	0	1	1	739.897	1478.79	1478.78	0.68	0.0005	672494	HCD (High Energy Collision Dissociation)	MS2	1.45958	60	21.306	6716	20241018_FJ_VOLTA_MP_Easy15_45min_1891_DDA_200ng_10.raw	F4	3	1
FALSE	High	Sequest HT (A2)	Unambiguous	[K].EGVVAAAEKTK.[Q]		1	SYUA_HUMAN_P37840	SYUA_HUMAN_P37840	1	3	0.5067	0	1	1	368.209	1102.61	1102.61	3.02	0.00111	414253	HCD (High Energy Collision Dissociation)	MS2	8.74779	60	6.1783	1095	20241018_FJ_VOLTA_MP_Easy15_45min_1891_DDA_200ng_6.raw	F8	3	1
FALSE	High	Sequest HT (A2)	Unambiguous	[K].EGVVAAAEK.[T]		1	SYUA_HUMAN_P37840	SYUA_HUMAN_P37840	0	2	0.5537	0	1	1	437.238	873.468	873.468	0.44	0.00019	32530026	HCD (High Energy Collision Dissociation)	MS2	5.8097	60	6.3993	1225	20241018_FJ_VOLTA_MP_Easy15_45min_1891_DDA_200ng_3.raw	F11	2.98	1
FALSE	High	Sequest HT (A2)	Unambiguous	[K].EqVTNVGGAVVTGVTAVAqK.[T]	Q2(Deamidated); Q19(Deamidated)	1	SYUA_HUMAN_P37840	SYUA_HUMAN_P37840	0	2	0.6242	0	1	1	965.512	1930.02	1930.01	1.63	0.00158	1.00838e+06	HCD (High Energy Collision Dissociation)	MS2	32.4395	60	25.7478	9658	20241018_FJ_VOLTA_MP_Easy15_45min_1891_DDA_200ng_7.raw	F7	2.98	1
FALSE	High	Sequest HT (A2)	Unambiguous	[K].QGVAEAAGKTKEGVLYVGSK.[T]		1	SYUA_HUMAN_P37840	SYUA_HUMAN_P37840	2	4	0.5805	0	1	1	498.776	1992.08	1992.08	2.72	0.00135	881337	HCD (High Energy Collision Dissociation)	MS2	19.5408	60	21.9479	4383	20241018_FJ_VOLTA_MP_Easy15_45min_1891_DDA_200ng_1_241018150029.raw	F13	2.98	1
FALSE	High	Sequest HT (A2)	Unambiguous	[K].TVEGAGSIAAATGFVK.[K]		1	SYUA_HUMAN_P37840	SYUA_HUMAN_P37840	0	2	0.6409	0	1	1	739.898	1478.79	1478.78	2.16	0.0016	630987	HCD (High Energy Collision Dissociation)	MS2	2.17882	60	22.092	7961	20241018_FJ_VOLTA_MP_Easy15_45min_1891_DDA_200ng_7.raw	F7	2.98	1
FALSE	High	Sequest HT (A2)	Unambiguous	[K].TKEqVTnVGGAVVTGVTAVAQK.[T]	Q4(Deamidated); N7(Deamidated)	1	SYUA_HUMAN_P37840	SYUA_HUMAN_P37840	1	3	0.302	0	1	1	720.394	2159.17	2159.16	6.23	0.00448	636062	HCD (High Energy Collision Dissociation)	MS2	30.7061	60	24.2833	9500	20241018_FJ_VOLTA_MP_Easy15_45min_1891_DDA_200ng_11.raw	F3	2.98	1
FALSE	High	Sequest HT (A2)	Unambiguous	[K].EqVTnVGGAVVTGVTAVAQK.[T]	Q2(Deamidated); N5(Deamidated)	1	SYUA_HUMAN_P37840	SYUA_HUMAN_P37840	0	2	0.6128	0	1	1	965.511	1930.02	1930.01	1.51	0.00146	401515	HCD (High Energy Collision Dissociation)	MS2	3.42043	60	25.8798	9536	20241018_FJ_VOLTA_MP_Easy15_45min_1891_DDA_200ng_9.raw	F5	2.97	1
FALSE	High	Sequest HT (A2)	Unambiguous	[K].EGVVHGVATVAEK.[T]		1	SYUA_HUMAN_P37840	SYUA_HUMAN_P37840	0	3	0.5169	0	1	1	432.57	1295.7	1295.7	0.55	0.00024	2098859	HCD (High Energy Collision Dissociation)	MS2	6.77517	60	8.3054	1838	20241018_FJ_VOLTA_MP_Easy15_45min_1891_DDA_200ng_2.raw	F12	2.96	1
FALSE	High	Sequest HT (A2)	Unambiguous	[K].TKEQVTNVGGAVVTGVTAVAQK.[T]		1	SYUA_HUMAN_P37840	SYUA_HUMAN_P37840	1	4	1	0	1	1	540.054	2157.2	2157.19	3.63	0.00196	428269	HCD (High Energy Collision Dissociation)	MS2	5.21248	60	18.9747	6616	20241018_FJ_VOLTA_MP_Easy15_45min_1891_DDA_200ng_7.raw	F7	2.96	1
FALSE	High	Sequest HT (A2)	Unambiguous	[K].EGVVAAAEK.[T]		1	SYUA_HUMAN_P37840	SYUA_HUMAN_P37840	0	2	0.5507	0	1	1	437.238	873.468	873.468	0.58	0.00025	2618190	HCD (High Energy Collision Dissociation)	MS2	15.1745	60	6.4058	1232	20241018_FJ_VOLTA_MP_Easy15_45min_1891_DDA_200ng_4.raw	F10	2.96	1
FALSE	High	Sequest HT (A2)	Unambiguous	[K].VIlDGSVNlPEGTlSEDSGTLIFQGHPVIHASVSGSAPVSLnQK.[D]	L3(Oxidation); L9(Oxidation); L14(Oxidation); N42(Deamidated)	1	Q8CWC7	Q8CWC7	0	5		0.0199	3	3	904.671	4519.32	4519.28	8.92	0.00806	5.45224e+06	HCD (High Energy Collision Dissociation)	MS2	0.726913	60	30.9262	12915	20241018_FJ_VOLTA_MP_Easy15_45min_1891_DDA_200ng_12.raw	F2	2.95	1
FALSE	High	Sequest HT (A2)	Unambiguous	[K].VIlDGSVNlPEGTlSEDSGTLIFQGHPVIHASVSGSAPVSLNqK.[D]	L3(Oxidation); L9(Oxidation); L14(Oxidation); Q43(Deamidated)	1	Q8CWC7	Q8CWC7	0	5		0.0199	3	4	904.671	4519.32	4519.28	8.92	0.00806	5.45224e+06	HCD (High Energy Collision Dissociation)	MS2	0.726913	60	30.9262	12915	20241018_FJ_VOLTA_MP_Easy15_45min_1891_DDA_200ng_12.raw	F2	2.95	1
FALSE	High	Sequest HT (A2)	Selected	[K].VIlDGSVNlPEGTlSEDSGTLIFQGHPVIHASVSGSAPVSLNQK.[D]	L3(Oxidation); L9(Oxidation); L14(Oxidation)	1	Q8CWC7	Q8CWC7	0	5	0.0475	0	1	1	904.471	4518.33	4518.3	5.91	0.00534	4790700	HCD (High Energy Collision Dissociation)	MS2	0.57725	60	31.9661	13460	20241018_FJ_VOLTA_MP_Easy15_45min_1891_DDA_200ng_12.raw	F2	2.95	1
FALSE	High	Sequest HT (A2)	Unambiguous	[K].VGDTVIEFDLPLLEEK.[A]		1	P69783	P69783	0	2	0.6814	0	1	1	908.987	1816.97	1816.96	4.47	0.00406	260151	HCD (High Energy Collision Dissociation)	MS2	7.16898	60	32.6226	13802	20241018_FJ_VOLTA_MP_Easy15_45min_1891_DDA_200ng_12.raw	F2	2.95	1
FALSE	High	Sequest HT (A2)	Unambiguous	[K].EGVVAAAEK.[T]		1	SYUA_HUMAN_P37840	SYUA_HUMAN_P37840	0	2	0.5476	0	1	1	437.238	873.468	873.468	0.3	0.00013	5110644	HCD (High Energy Collision Dissociation)	MS2	6.37543	60	6.3895	1203	20241018_FJ_VOLTA_MP_Easy15_45min_1891_DDA_200ng_6.raw	F8	2.94	1
FALSE	High	Sequest HT (A2)	Unambiguous	[K].TVEGAGSIAAATGFVK.[K]		1	SYUA_HUMAN_P37840	SYUA_HUMAN_P37840	0	2	0.602	0	1	1	739.899	1478.79	1478.78	4.23	0.00313	880374	HCD (High Energy Collision Dissociation)	MS2	10.7901	60	23.1858	8371	20241018_FJ_VOLTA_MP_Easy15_45min_1891_DDA_200ng_9.raw	F5	2.94	1
FALSE	High	Sequest HT (A2)	Unambiguous	[K].EGVVAAAEK.[T]		1	SYUA_HUMAN_P37840	SYUA_HUMAN_P37840	0	2	0.568	0	1	1	437.238	873.468	873.468	0.58	0.00025	2618190	HCD (High Energy Collision Dissociation)	MS2	9.42413	60	6.4089	1234	20241018_FJ_VOLTA_MP_Easy15_45min_1891_DDA_200ng_4.raw	F10	2.94	1
FALSE	High	Sequest HT (A2)	Unambiguous	[K].ALEEAGAEVEVK.[-]		2	C5A0S6	C5A0S6; B7MRB2	0	2	0.602	0	1	1	622.822	1244.64	1244.64	0.4	0.00025	1217779	HCD (High Energy Collision Dissociation)	MS2	16.5441	60	11.4759	3679	20241018_FJ_VOLTA_MP_Easy15_45min_1891_DDA_200ng_12.raw	F2	2.94	1
FALSE	High	Sequest HT (A2)	Unambiguous	[K].ViLDGSVNLPEGTLSEDSGTLiFQGHPVIhASVSGSAPVSLnQK.[D]	I2(Oxidation); I22(Oxidation); H30(Oxidation); N42(Deamidated)	1	Q8CWC7	Q8CWC7	0	5		0.0233	5	5	904.671	4519.32	4519.28	8.92	0.00806	5.45224e+06	HCD (High Energy Collision Dissociation)	MS2	0.726913	60	30.9262	12915	20241018_FJ_VOLTA_MP_Easy15_45min_1891_DDA_200ng_12.raw	F2	2.94	1
FALSE	High	Sequest HT (A2)	Unambiguous	[K].ViLDGSVNLPEGTLSEDSGTLiFQGHPVIhASVSGSAPVSLNqK.[D]	I2(Oxidation); I22(Oxidation); H30(Oxidation); Q43(Deamidated)	1	Q8CWC7	Q8CWC7	0	5		0.0233	5	6	904.671	4519.32	4519.28	8.92	0.00806	5.45224e+06	HCD (High Energy Collision Dissociation)	MS2	0.726913	60	30.9262	12915	20241018_FJ_VOLTA_MP_Easy15_45min_1891_DDA_200ng_12.raw	F2	2.94	1
FALSE	High	Sequest HT (A2)	Unambiguous	[K].TVEGAGSIAAATGfVK.[K]	F14(Oxidation)	1	SYUA_HUMAN_P37840	SYUA_HUMAN_P37840	0	2	0.0273	0	1	1	747.894	1494.78	1494.78	0.81	0.0006	574978	HCD (High Energy Collision Dissociation)	MS2	36.3734	60	23.7202	7404	20241018_FJ_VOLTA_MP_Easy15_45min_1891_DDA_200ng_3.raw	F11	2.93	1
FALSE	High	Sequest HT (A2)	Unambiguous	[K].TVEGAGSIAAATGFVK.[K]		1	SYUA_HUMAN_P37840	SYUA_HUMAN_P37840	0	2	0.6246	0	1	1	739.898	1478.79	1478.78	2.7	0.00199	0	HCD (High Energy Collision Dissociation)	MS2		60	26.4117	10566	20241018_FJ_VOLTA_MP_Easy15_45min_1891_DDA_200ng_11.raw	F3	2.93	1
FALSE	High	Sequest HT (A2)	Unambiguous	[K].ViLDGSVNLPEGTLSEDSGTLiFQGHPViHASVSGSAPVSLnQK.[D]	I2(Oxidation); I22(Oxidation); I29(Oxidation); N42(Deamidated)	1	Q8CWC7	Q8CWC7	0	5		0.0332	7	7	904.671	4519.32	4519.28	8.92	0.00806	5.45224e+06	HCD (High Energy Collision Dissociation)	MS2	0.726913	60	30.9262	12915	20241018_FJ_VOLTA_MP_Easy15_45min_1891_DDA_200ng_12.raw	F2	2.91	1
FALSE	High	Sequest HT (A2)	Unambiguous	[K].ViLDGSVNLPEGTLSEDSGTLiFQGHPViHASVSGSAPVSLNqK.[D]	I2(Oxidation); I22(Oxidation); I29(Oxidation); Q43(Deamidated)	1	Q8CWC7	Q8CWC7	0	5		0.0332	7	8	904.671	4519.32	4519.28	8.92	0.00806	5.45224e+06	HCD (High Energy Collision Dissociation)	MS2	0.726913	60	30.9262	12915	20241018_FJ_VOLTA_MP_Easy15_45min_1891_DDA_200ng_12.raw	F2	2.91	1
FALSE	High	Sequest HT (A2)	Unambiguous	[K].TKEGVLYVGSK.[T]		1	SYUA_HUMAN_P37840	SYUA_HUMAN_P37840	1	2	0.7148	0	1	1	590.834	1180.66	1180.66	3.46	0.00204	9793203	HCD (High Energy Collision Dissociation)	MS2	3.5607	60	8.1479	2230	20241018_FJ_VOLTA_MP_Easy15_45min_1891_DDA_200ng_11.raw	F3	2.91	1
FALSE	High	Sequest HT (A2)	Unambiguous	[K].EGVVAAAEK.[T]		1	SYUA_HUMAN_P37840	SYUA_HUMAN_P37840	0	2	0.5773	0	1	1	437.237	873.467	873.468	-1.03	-0.00045	6.43414e+06	HCD (High Energy Collision Dissociation)	MS2	5.80534	60	6.3684	1235	20241018_FJ_VOLTA_MP_Easy15_45min_1891_DDA_200ng_8.raw	F6	2.91	1
FALSE	High	Sequest HT (A2)	Unambiguous	[K].EGVVHGVATVAEK.[T]		1	SYUA_HUMAN_P37840	SYUA_HUMAN_P37840	0	3	0.5552	0	1	1	432.571	1295.7	1295.7	1.47	0.00064	1.07273e+06	HCD (High Energy Collision Dissociation)	MS2	9.77733	60	8.2816	1931	20241018_FJ_VOLTA_MP_Easy15_45min_1891_DDA_200ng_3.raw	F11	2.9	1
FALSE	High	Sequest HT (A2)	Unambiguous	[K].EGVVHGVATVAEK.[T]		1	SYUA_HUMAN_P37840	SYUA_HUMAN_P37840	0	3	0.5138	0	1	1	432.571	1295.7	1295.7	3.45	0.00149	1.27971e+06	HCD (High Energy Collision Dissociation)	MS2	12.0594	60	10.0631	3083	20241018_FJ_VOLTA_MP_Easy15_45min_1891_DDA_200ng_11.raw	F3	2.9	1
FALSE	High	Sequest HT (A2)	Unambiguous	[K].EQVTNVGGAVVTGVTAVAQK.[T]		1	SYUA_HUMAN_P37840	SYUA_HUMAN_P37840	0	3	0.7439	0	1	1	643.354	1928.05	1928.04	1.51	0.00097	606400	HCD (High Energy Collision Dissociation)	MS2	0	60	18.5405	6442	20241018_FJ_VOLTA_MP_Easy15_45min_1891_DDA_200ng_7.raw	F7	2.89	1
FALSE	High	Sequest HT (A2)	Unambiguous	[K].EGVVHGVATVAEK.[T]		1	SYUA_HUMAN_P37840	SYUA_HUMAN_P37840	0	2	0.2941	0	1	1	648.352	1295.7	1295.7	1.77	0.00114	533330	HCD (High Energy Collision Dissociation)	MS2	1.17112	60	8.3257	1845	20241018_FJ_VOLTA_MP_Easy15_45min_1891_DDA_200ng_2.raw	F12	2.89	1
FALSE	High	Sequest HT (A2)	Unambiguous	[K].EQVTNVGGAVVTGVTAVAQK.[T]		1	SYUA_HUMAN_P37840	SYUA_HUMAN_P37840	0	3	0.692	0	1	1	643.354	1928.05	1928.04	1.98	0.00128	300593	HCD (High Energy Collision Dissociation)	MS2	2.17197	60	21.9539	6493	20241018_FJ_VOLTA_MP_Easy15_45min_1891_DDA_200ng_4.raw	F10	2.89	1
FALSE	High	Sequest HT (A2)	Unambiguous	[K].EGVVHGVATVAEK.[T]		1	SYUA_HUMAN_P37840	SYUA_HUMAN_P37840	0	3	0.4706	0	1	1	432.572	1295.7	1295.7	3.52	0.00152	1.36809e+06	HCD (High Energy Collision Dissociation)	MS2	8.92912	60	9.5537	2862	20241018_FJ_VOLTA_MP_Easy15_45min_1891_DDA_200ng_11.raw	F3	2.89	1
FALSE	High	Sequest HT (A2)	Unambiguous	[K].EGVLYVGSK.[T]		1	SYUA_HUMAN_P37840	SYUA_HUMAN_P37840	0	2	0.6194	0	1	1	476.265	951.522	951.515	7.63	0.00363	49355996	HCD (High Energy Collision Dissociation)	MS2	2.08378	46.62	11.9532	3879	20241018_FJ_VOLTA_MP_Easy15_45min_1891_DDA_200ng_11.raw	F3	2.89	1
FALSE	High	Sequest HT (A2)	Unambiguous	[K].EGVVAAAEK.[T]		1	SYUA_HUMAN_P37840	SYUA_HUMAN_P37840	0	2	0.5606	0	1	1	437.238	873.469	873.468	2.11	0.00092	151131824	HCD (High Energy Collision Dissociation)	MS2	2.6076	13.433	6.3557	1381	20241018_FJ_VOLTA_MP_Easy15_45min_1891_DDA_200ng_12.raw	F2	2.89	1
FALSE	High	Sequest HT (A2)	Unambiguous	[K].EQVTnVGGAVVTGVTAVAQK.[T]	N5(Deamidated)	1	SYUA_HUMAN_P37840	SYUA_HUMAN_P37840	0	3	0.1038	0	1	1	643.681	1929.03	1929.03	-0.2	-0.00013	328157	HCD (High Energy Collision Dissociation)	MS2	6.92254	60	24.4702	8842	20241018_FJ_VOLTA_MP_Easy15_45min_1891_DDA_200ng_8.raw	F6	2.89	1
FALSE	High	Sequest HT (A2)	Unambiguous	[K].EGVVhGVATVAEK.[T]	H5(Oxidation)	1	SYUA_HUMAN_P37840	SYUA_HUMAN_P37840	0	2	0.1453	0	1	1	656.348	1311.69	1311.69	-0.99	-0.00065	724977	HCD (High Energy Collision Dissociation)	MS2	0	60	11.7127	3567	20241018_FJ_VOLTA_MP_Easy15_45min_1891_DDA_200ng_7.raw	F7	2.89	1
FALSE	High	Sequest HT (A2)	Unambiguous	[K].EGVVAAAEK.[T]		1	SYUA_HUMAN_P37840	SYUA_HUMAN_P37840	0	2	0.559	0	1	1	437.238	873.469	873.468	1.55	0.00068	64970184	HCD (High Energy Collision Dissociation)	MS2	4.4098	37.445	6.3903	1179	20241018_FJ_VOLTA_MP_Easy15_45min_1891_DDA_200ng_2.raw	F12	2.88	1
FALSE	High	Sequest HT (A2)	Unambiguous	[K].tKEGVVHGVATVAEK.[T]	T1(Oxidation)	1	SYUA_HUMAN_P37840	SYUA_HUMAN_P37840	1	3	0.0139	0	1	1	514.284	1540.84	1540.83	2.32	0.00119	140253	HCD (High Energy Collision Dissociation)	MS2	37.6338	60	6.3659	1208	20241018_FJ_VOLTA_MP_Easy15_45min_1891_DDA_200ng_3.raw	F11	2.88	1
FALSE	High	Sequest HT (A2)	Unambiguous	[K].EGVVAAAEK.[T]		1	SYUA_HUMAN_P37840	SYUA_HUMAN_P37840	0	2	0.559	0	1	1	437.239	873.471	873.468	4.14	0.00181	108552400	HCD (High Energy Collision Dissociation)	MS2	3.02015	21.798	6.342	1388	20241018_FJ_VOLTA_MP_Easy15_45min_1891_DDA_200ng_11.raw	F3	2.88	1
FALSE	High	Sequest HT (A2)	Unambiguous	[K].qGVAEAAGK.[T]	Q1(Deamidated)	1	SYUA_HUMAN_P37840	SYUA_HUMAN_P37840	0	2	0.5122	0	1	1	416.212	831.418	831.421	-3.71	-0.00154	3.72266e+06	HCD (High Energy Collision Dissociation)	MS2	9.95864	60	21.0474	3924	20241018_FJ_VOLTA_MP_Easy15_45min_1891_DDA_200ng_1_241018150029.raw	F13	2.87	1
FALSE	High	Sequest HT (A2)	Unambiguous	[K].EGVVAAAEK.[T]		1	SYUA_HUMAN_P37840	SYUA_HUMAN_P37840	0	2	0.5664	0	1	1	437.238	873.469	873.468	1.48	0.00065	6.49388e+06	HCD (High Energy Collision Dissociation)	MS2	18.1614	60	6.2969	1288	20241018_FJ_VOLTA_MP_Easy15_45min_1891_DDA_200ng_7.raw	F7	2.86	1
FALSE	High	Sequest HT (A2)	Unambiguous	[K].TVEGAGSIAAATGFVK.[K]		1	SYUA_HUMAN_P37840	SYUA_HUMAN_P37840	0	2	0.7098	0	1	1	739.896	1478.78	1478.78	-0.56	-0.00041	360652	HCD (High Energy Collision Dissociation)	MS2	11.6075	60	19.7255	4910	20241018_FJ_VOLTA_MP_Easy15_45min_1891_DDA_200ng_13.raw	F1	2.86	1
FALSE	High	Sequest HT (A2)	Unambiguous	[K].EGVVAAAEK.[T]		1	SYUA_HUMAN_P37840	SYUA_HUMAN_P37840	0	2	0.549	0	1	1	437.237	873.468	873.468	-0.05	-2e-05	2.4796e+06	HCD (High Energy Collision Dissociation)	MS2	10.4272	60	6.3845	1207	20241018_FJ_VOLTA_MP_Easy15_45min_1891_DDA_200ng_10.raw	F4	2.86	1
FALSE	High	Sequest HT (A2)	Unambiguous	[K].EGVVHGVATVAEK.[T]		1	SYUA_HUMAN_P37840	SYUA_HUMAN_P37840	0	3	0.4685	0	1	1	432.571	1295.7	1295.7	1.69	0.00073	1.72539e+06	HCD (High Energy Collision Dissociation)	MS2	6.53788	60	8.1691	2065	20241018_FJ_VOLTA_MP_Easy15_45min_1891_DDA_200ng_8.raw	F6	2.86	1
FALSE	High	Sequest HT (A2)	Unambiguous	[-].mNIRPLHDR.[V]	M1(Oxidation)	1	B1XDP6	B1XDP6	0	3	0.0874	0	1	1	389.874	1167.61	1167.61	1.41	0.00055	11873869	HCD (High Energy Collision Dissociation)	MS2	3.48712	60	6.1575	1097	20241018_FJ_VOLTA_MP_Easy15_45min_1891_DDA_200ng_3.raw	F11	2.86	1
FALSE	High	Sequest HT (A2)	Unambiguous	[K].EGVLYVGSK.[T]		1	SYUA_HUMAN_P37840	SYUA_HUMAN_P37840	0	2	0.6538	0	1	1	476.263	951.519	951.515	4.43	0.00211	5.0924e+06	HCD (High Energy Collision Dissociation)	MS2	2.49514	60	12.4605	4105	20241018_FJ_VOLTA_MP_Easy15_45min_1891_DDA_200ng_11.raw	F3	2.86	1
FALSE	High	Sequest HT (A2)	Unambiguous	[K].TVEGAGSIAAATGFvK.[K]	V15(Oxidation)	1	SYUA_HUMAN_P37840	SYUA_HUMAN_P37840	0	2		0.0273	2	2	747.894	1494.78	1494.78	0.81	0.0006	574978	HCD (High Energy Collision Dissociation)	MS2	36.3734	60	23.7202	7404	20241018_FJ_VOLTA_MP_Easy15_45min_1891_DDA_200ng_3.raw	F11	2.85	1
FALSE	High	Sequest HT (A2)	Unambiguous	[K].TKEqVTnVGGAVVTGVTAVAQK.[T]	Q4(Deamidated); N7(Deamidated)	1	SYUA_HUMAN_P37840	SYUA_HUMAN_P37840	1	3	0.6842	0	1	1	720.394	2159.17	2159.16	5.81	0.00418	321373	HCD (High Energy Collision Dissociation)	MS2	20.4345	60	21.4692	8178	20241018_FJ_VOLTA_MP_Easy15_45min_1891_DDA_200ng_12.raw	F2	2.85	1
FALSE	High	Sequest HT (A2)	Unambiguous	[K].VGDIVIFNDGYGVK.[S]		1	B1XDP6	B1XDP6	0	2	0.6842	0	1	1	748.396	1495.78	1495.78	3.17	0.00237	941462	HCD (High Energy Collision Dissociation)	MS2	2.10519	60	25.2771	9997	20241018_FJ_VOLTA_MP_Easy15_45min_1891_DDA_200ng_11.raw	F3	2.85	1
FALSE	High	Sequest HT (A2)	Unambiguous	[K].SAGGIVLTGSAAAK.[S]		1	B1XDP6	B1XDP6	0	2	0.6491	0	1	1	601.84	1202.67	1202.67	-0.45	-0.00027	640176	HCD (High Energy Collision Dissociation)	MS2	11.6465	60	11.2313	3391	20241018_FJ_VOLTA_MP_Easy15_45min_1891_DDA_200ng_7.raw	F7	2.85	1
FALSE	High	Sequest HT (A2)	Unambiguous	[K].TKEGVLYVGSK.[T]		1	SYUA_HUMAN_P37840	SYUA_HUMAN_P37840	1	3	0.4982	0	1	1	394.224	1180.66	1180.66	1.05	0.00041	2.56552e+06	HCD (High Energy Collision Dissociation)	MS2	3.08093	60	8.1929	1898	20241018_FJ_VOLTA_MP_Easy15_45min_1891_DDA_200ng_3.raw	F11	2.85	1
FALSE	High	Sequest HT (A2)	Unambiguous	[K].EqVTNVGGAVVTGVTAVAqK.[T]	Q2(Deamidated); Q19(Deamidated)	1	SYUA_HUMAN_P37840	SYUA_HUMAN_P37840	0	2	0.7754	0	1	1	965.513	1930.02	1930.01	2.84	0.00274	282342	HCD (High Energy Collision Dissociation)	MS2	0	60	25.1155	6425	20241018_FJ_VOLTA_MP_Easy15_45min_1891_DDA_200ng_13.raw	F1	2.85	1
FALSE	High	Sequest HT (A2)	Unambiguous	[K].TVEGAGSIAAATGFVK.[K]		1	SYUA_HUMAN_P37840	SYUA_HUMAN_P37840	0	3	0.6937	0	1	1	493.6	1478.79	1478.78	0.11	5e-05	13191178	HCD (High Energy Collision Dissociation)	MS2	0	60	20.9405	7933	20241018_FJ_VOLTA_MP_Easy15_45min_1891_DDA_200ng_12.raw	F2	2.84	1
FALSE	High	Sequest HT (A2)	Unambiguous	[K].TKEGVLYVGSK.[T]		1	SYUA_HUMAN_P37840	SYUA_HUMAN_P37840	1	3	0.5634	0	1	1	394.224	1180.66	1180.66	0.19	8e-05	1237605	HCD (High Energy Collision Dissociation)	MS2	1.74642	60	8.6723	2323	20241018_FJ_VOLTA_MP_Easy15_45min_1891_DDA_200ng_7.raw	F7	2.84	1
FALSE	High	Sequest HT (A2)	Unambiguous	[K].TkEGVVHGVATVAEK.[T]	K2(Oxidation)	1	SYUA_HUMAN_P37840	SYUA_HUMAN_P37840	1	3		0.0139	2	2	514.284	1540.84	1540.83	2.32	0.00119	140253	HCD (High Energy Collision Dissociation)	MS2	37.6338	60	6.3659	1208	20241018_FJ_VOLTA_MP_Easy15_45min_1891_DDA_200ng_3.raw	F11	2.84	1
FALSE	High	Sequest HT (A2)	Unambiguous	[K].EGVVHGVATVAEK.[T]		1	SYUA_HUMAN_P37840	SYUA_HUMAN_P37840	0	2	0.311	0	1	1	648.354	1295.7	1295.7	4.59	0.00298	509544	HCD (High Energy Collision Dissociation)	MS2	10.9751	60	7.9727	2182	20241018_FJ_VOLTA_MP_Easy15_45min_1891_DDA_200ng_12.raw	F2	2.83	1
FALSE	High	Sequest HT (A2)	Unambiguous	[K].qGVAEAAGK.[T]	Q1(Deamidated)	1	SYUA_HUMAN_P37840	SYUA_HUMAN_P37840	0	2	0.4417	0	1	1	416.214	831.421	831.421	0.47	0.0002	5.34624e+06	HCD (High Energy Collision Dissociation)	MS2	6.04744	60	6.3451	1390	20241018_FJ_VOLTA_MP_Easy15_45min_1891_DDA_200ng_11.raw	F3	2.83	1
FALSE	High	Sequest HT (A2)	Unambiguous	[K].TVEGAGSIAAATGFVK.[K]		1	SYUA_HUMAN_P37840	SYUA_HUMAN_P37840	0	2	0.6148	0	1	1	739.898	1478.79	1478.78	2.25	0.00166	717898	HCD (High Energy Collision Dissociation)	MS2	7.35306	60	21.9701	8427	20241018_FJ_VOLTA_MP_Easy15_45min_1891_DDA_200ng_12.raw	F2	2.83	1
FALSE	High	Sequest HT (A2)	Unambiguous	[K].EGVVAAAEK.[T]		1	SYUA_HUMAN_P37840	SYUA_HUMAN_P37840	0	2	0.5709	0	1	1	437.239	873.47	873.468	2.88	0.00126	32189932	HCD (High Energy Collision Dissociation)	MS2	2.57966	60	6.4707	1238	20241018_FJ_VOLTA_MP_Easy15_45min_1891_DDA_200ng_6.raw	F8	2.82	1
FALSE	High	Sequest HT (A2)	Unambiguous	[K].qGVAEAAGK.[T]	Q1(Deamidated)	1	SYUA_HUMAN_P37840	SYUA_HUMAN_P37840	0	2	0.539	0	1	1	416.213	831.419	831.421	-1.95	-0.00081	570409	HCD (High Energy Collision Dissociation)	MS2	30.2304	60	6.3556	1229	20241018_FJ_VOLTA_MP_Easy15_45min_1891_DDA_200ng_8.raw	F6	2.82	1
FALSE	High	Sequest HT (A2)	Unambiguous	[K].EGVVAAAEK.[T]		1	SYUA_HUMAN_P37840	SYUA_HUMAN_P37840	0	2	0.5638	0	1	1	437.238	873.47	873.468	2.39	0.00105	1.42753e+06	HCD (High Energy Collision Dissociation)	MS2	51.0417	60	8.3706	2329	20241018_FJ_VOLTA_MP_Easy15_45min_1891_DDA_200ng_11.raw	F3	2.82	1
FALSE	High	Sequest HT (A2)	Unambiguous	[K].TKEQVTNVGGAVVTGVtAVAQK.[T]	T17(Oxidation)	1	SYUA_HUMAN_P37840	SYUA_HUMAN_P37840	1	3	0.0319	0	1	1	725.069	2173.19	2173.18	4.8	0.00348	293039	HCD (High Energy Collision Dissociation)	MS2	27.1718	60	14.7084	5160	20241018_FJ_VOLTA_MP_Easy15_45min_1891_DDA_200ng_11.raw	F3	2.82	1
FALSE	High	Sequest HT (A2)	Unambiguous	[K].TKEQVTNVGGAVVTGVTAvAQK.[T]	V19(Oxidation)	1	SYUA_HUMAN_P37840	SYUA_HUMAN_P37840	1	3	0.0319	0	1	2	725.069	2173.19	2173.18	4.8	0.00348	293039	HCD (High Energy Collision Dissociation)	MS2	27.1718	60	14.7084	5160	20241018_FJ_VOLTA_MP_Easy15_45min_1891_DDA_200ng_11.raw	F3	2.82	1
FALSE	High	Sequest HT (A2)	Unambiguous	[K].DLVESAPAALK.[E]		2	C5A0S6	C5A0S6; B7MRB2	0	2	0.7695	0	1	1	557.312	1113.62	1113.62	1.12	0.00062	1.99588e+06	HCD (High Energy Collision Dissociation)	MS2	0.523209	60	16.0274	5084	20241018_FJ_VOLTA_MP_Easy15_45min_1891_DDA_200ng_5.raw	F9	2.82	1
FALSE	High	Sequest HT (A2)	Unambiguous	[K].EGVVHGVATVAEK.[T]		1	SYUA_HUMAN_P37840	SYUA_HUMAN_P37840	0	2	0.2908	0	1	1	648.353	1295.7	1295.7	2.61	0.00169	509866	HCD (High Energy Collision Dissociation)	MS2	7.4693	60	9.3017	2747	20241018_FJ_VOLTA_MP_Easy15_45min_1891_DDA_200ng_11.raw	F3	2.82	1
FALSE	High	Sequest HT (A2)	Unambiguous	[K].EqVTNVGGAVVTGVTAVAqK.[T]	Q2(Deamidated); Q19(Deamidated)	1	SYUA_HUMAN_P37840	SYUA_HUMAN_P37840	0	3	0.5319	0	1	1	644.011	1930.02	1930.01	3.3	0.00213	303260	HCD (High Energy Collision Dissociation)	MS2	9.04175	60	25.042	6407	20241018_FJ_VOLTA_MP_Easy15_45min_1891_DDA_200ng_13.raw	F1	2.82	1
FALSE	High	Sequest HT (A2)	Unambiguous	[K].EGVVHGVATVAEK.[T]		1	SYUA_HUMAN_P37840	SYUA_HUMAN_P37840	0	3	0.5374	0	1	1	432.571	1295.7	1295.7	3.38	0.00146	2.05081e+06	HCD (High Energy Collision Dissociation)	MS2	20.8241	60	7.9885	2189	20241018_FJ_VOLTA_MP_Easy15_45min_1891_DDA_200ng_12.raw	F2	2.81	1
FALSE	High	Sequest HT (A2)	Unambiguous	[K].IqMDYLIKNLFDlGDlDSEIPTVEDlYK.[N]	Q2(Deamidated); L13(Oxidation); L16(Oxidation); L26(Oxidation)	1	P25239	P25239	1	4	0.0996	0	1	1	838.169	3349.65	3349.63	7.28	0.0061	46711748	HCD (High Energy Collision Dissociation)	MS2	5.35381	60	29.3345	12084	20241018_FJ_VOLTA_MP_Easy15_45min_1891_DDA_200ng_12.raw	F2	2.81	1
FALSE	High	Sequest HT (A2)	Unambiguous	[K].TKEQVTNVGGAVVTGVTAVAQK.[T]		1	SYUA_HUMAN_P37840	SYUA_HUMAN_P37840	1	3	0.7082	0	1	1	719.735	2157.19	2157.19	1.91	0.00138	257317	HCD (High Energy Collision Dissociation)	MS2	35.1063	60	16.4989	5631	20241018_FJ_VOLTA_MP_Easy15_45min_1891_DDA_200ng_7.raw	F7	2.81	1
FALSE	High	Sequest HT (A2)	Unambiguous	[R].GEVLAVGnGR.[I]	N8(Deamidated)	1	B1XDP6	B1XDP6	0	2	0.1174	0	1	1	486.759	972.511	972.511	-0.16	-8e-05	925107	HCD (High Energy Collision Dissociation)	MS2	5.23271	60	10.8655	2820	20241018_FJ_VOLTA_MP_Easy15_45min_1891_DDA_200ng_4.raw	F10	2.81	1
FALSE	High	Sequest HT (A2)	Rejected	[R].KPVGLRYDPQAQSLVcLPTQTRTGWNLNGFEVGFrPcVR.[L]	C16(Carbamidomethyl); R35(Deamidated); C37(Carbamidomethyl)	1		P77183	2	5		0.0475	2	2	904.471	4518.33	4518.29	7.61	0.00688	4790700	HCD (High Energy Collision Dissociation)	MS2	0.57725	60	31.9661	13460	20241018_FJ_VOLTA_MP_Easy15_45min_1891_DDA_200ng_12.raw	F2	2.81	0
FALSE	High	Sequest HT (A2)	Unambiguous	[K].EGVLYVGSK.[T]		1	SYUA_HUMAN_P37840	SYUA_HUMAN_P37840	0	2	0.6321	0	1	1	476.262	951.516	951.515	1.86	0.00089	7.16123e+06	HCD (High Energy Collision Dissociation)	MS2	2.30811	60	12.0679	3631	20241018_FJ_VOLTA_MP_Easy15_45min_1891_DDA_200ng_8.raw	F6	2.8	1
FALSE	High	Sequest HT (A2)	Unambiguous	[K].TKEGVVHGVATVAEKTK.[E]		1	SYUA_HUMAN_P37840	SYUA_HUMAN_P37840	2	4	0.7036	0	1	1	439.25	1753.98	1753.98	-0.94	-0.00041	439549	HCD (High Energy Collision Dissociation)	MS2	3.6487	60	20.9006	3850	20241018_FJ_VOLTA_MP_Easy15_45min_1891_DDA_200ng_1_241018150029.raw	F13	2.8	1
FALSE	High	Sequest HT (A2)	Unambiguous	[K].EGVLYVGSKTK.[E]		1	SYUA_HUMAN_P37840	SYUA_HUMAN_P37840	1	3	0.6643	0	1	1	394.223	1180.66	1180.66	-1.43	-0.00056	8409426	HCD (High Energy Collision Dissociation)	MS2	1.55934	60	7.6631	1929	20241018_FJ_VOLTA_MP_Easy15_45min_1891_DDA_200ng_7.raw	F7	2.8	1
FALSE	High	Sequest HT (A2)	Unambiguous	[K].EGVLYVGSK.[T]		1	SYUA_HUMAN_P37840	SYUA_HUMAN_P37840	0	2	0.6643	0	1	1	476.262	951.517	951.515	2.95	0.0014	1.40243e+06	HCD (High Energy Collision Dissociation)	MS2	2.07678	60	12.4896	3778	20241018_FJ_VOLTA_MP_Easy15_45min_1891_DDA_200ng_9.raw	F5	2.8	1
FALSE	High	Sequest HT (A2)	Unambiguous	[K].TVEGAGsIAAATGFVK.[K]	S7(Oxidation)	1	SYUA_HUMAN_P37840	SYUA_HUMAN_P37840	0	2	0.0964	0	1	1	747.889	1494.77	1494.78	-6.54	-0.00489	1.66775e+06	HCD (High Energy Collision Dissociation)	MS2	7.39542	60	20.8978	7383	20241018_FJ_VOLTA_MP_Easy15_45min_1891_DDA_200ng_9.raw	F5	2.8	1
FALSE	High	Sequest HT (A2)	Unambiguous	[K].EGVVAAAEK.[T]		1	SYUA_HUMAN_P37840	SYUA_HUMAN_P37840	0	2	0.5571	0	1	1	437.239	873.471	873.468	3.44	0.0015	1.2696e+06	HCD (High Energy Collision Dissociation)	MS2	7.88854	60	6.87	1647	20241018_FJ_VOLTA_MP_Easy15_45min_1891_DDA_200ng_12.raw	F2	2.8	1
FALSE	High	Sequest HT (A2)	Unambiguous	[K].TVEGAGSIAAATGFVk.[K]	K16(Oxidation)	1	SYUA_HUMAN_P37840	SYUA_HUMAN_P37840	0	2		0.0444	3	3	747.894	1494.78	1494.78	0.81	0.0006	574978	HCD (High Energy Collision Dissociation)	MS2	36.3734	60	23.7202	7404	20241018_FJ_VOLTA_MP_Easy15_45min_1891_DDA_200ng_3.raw	F11	2.8	1
FALSE	High	Sequest HT (A2)	Unambiguous	[K].EGVVAAAEK.[T]		1	SYUA_HUMAN_P37840	SYUA_HUMAN_P37840	0	2	0.5607	0	1	1	437.239	873.471	873.468	3.65	0.00159	1.36402e+06	HCD (High Energy Collision Dissociation)	MS2	21.0304	60	6.3563	1230	20241018_FJ_VOLTA_MP_Easy15_45min_1891_DDA_200ng_13.raw	F1	2.8	1
FALSE	High	Sequest HT (A2)	Unambiguous	[K].EGVLYVGSK.[T]		1	SYUA_HUMAN_P37840	SYUA_HUMAN_P37840	0	2	0.6344	0	1	1	476.261	951.515	951.515	0.58	0.00028	5.71292e+06	HCD (High Energy Collision Dissociation)	MS2	0	60	11.4466	3658	20241018_FJ_VOLTA_MP_Easy15_45min_1891_DDA_200ng_11.raw	F3	2.79	1
FALSE	High	Sequest HT (A2)	Unambiguous	[K].TKEGVVhGVATVAEK.[T]	H7(Oxidation)	1	SYUA_HUMAN_P37840	SYUA_HUMAN_P37840	1	3	0.0466	0	1	1	514.284	1540.84	1540.83	3.86	0.00198	366927	HCD (High Energy Collision Dissociation)	MS2	0	60	9.1449	2522	20241018_FJ_VOLTA_MP_Easy15_45min_1891_DDA_200ng_7.raw	F7	2.79	1
FALSE	High	Sequest HT (A2)	Unambiguous	[K].EGVVHGVATVAEK.[T]		1	SYUA_HUMAN_P37840	SYUA_HUMAN_P37840	0	3	0.509	0	1	1	432.571	1295.7	1295.7	2.96	0.00128	1.26458e+06	HCD (High Energy Collision Dissociation)	MS2	10.5757	60	9.0051	2354	20241018_FJ_VOLTA_MP_Easy15_45min_1891_DDA_200ng_9.raw	F5	2.79	1
FALSE	High	Sequest HT (A2)	Unambiguous	[K].qGVAEAAGK.[T]	Q1(Deamidated)	1	SYUA_HUMAN_P37840	SYUA_HUMAN_P37840	0	2	0.4875	0	1	1	416.214	831.421	831.421	-0.11	-5e-05	2.4366e+06	HCD (High Energy Collision Dissociation)	MS2	5.67598	60	6.3604	1164	20241018_FJ_VOLTA_MP_Easy15_45min_1891_DDA_200ng_2.raw	F12	2.79	1
FALSE	High	Sequest HT (A2)	Unambiguous	[K].EGVVAAAEK.[T]		1	SYUA_HUMAN_P37840	SYUA_HUMAN_P37840	0	2	0.5324	0	1	1	437.239	873.47	873.468	2.6	0.00114	664981	HCD (High Energy Collision Dissociation)	MS2	13.168	60	6.8859	1488	20241018_FJ_VOLTA_MP_Easy15_45min_1891_DDA_200ng_8.raw	F6	2.78	1
FALSE	High	Sequest HT (A2)	Unambiguous	[K].EqVTnVGGAVVTGVTAVAqK.[T]	Q2(Deamidated); N5(Deamidated); Q19(Deamidated)	1	SYUA_HUMAN_P37840	SYUA_HUMAN_P37840	0	3	0.6823	0	1	1	644.338	1931	1931	0.74	0.00047	228453	HCD (High Energy Collision Dissociation)	MS2	14.5156	60	28.1878	7405	20241018_FJ_VOLTA_MP_Easy15_45min_1891_DDA_200ng_1_241018150029.raw	F13	2.77	1
FALSE	High	Sequest HT (A2)	Unambiguous	[K].VGDIVIFnDGYGVK.[S]	N8(Deamidated)	1	B1XDP6	B1XDP6	0	2	0.6462	0	1	1	748.886	1496.76	1496.76	1.21	0.0009	630839	HCD (High Energy Collision Dissociation)	MS2	0	60	27.488	8876	20241018_FJ_VOLTA_MP_Easy15_45min_1891_DDA_200ng_3.raw	F11	2.77	1
FALSE	High	Sequest HT (A2)	Unambiguous	[K].TVEGAGSIAAATGFVK.[K]		1	SYUA_HUMAN_P37840	SYUA_HUMAN_P37840	0	2	0.5126	0	1	1	739.897	1478.79	1478.78	1.09	0.00081	480433	HCD (High Energy Collision Dissociation)	MS2	1.90117	60	20.7784	7275	20241018_FJ_VOLTA_MP_Easy15_45min_1891_DDA_200ng_8.raw	F6	2.77	1
FALSE	High	Sequest HT (A2)	Unambiguous	[K].EGVVAAAEKTK.[Q]		1	SYUA_HUMAN_P37840	SYUA_HUMAN_P37840	1	3	0.3696	0	1	1	368.208	1102.61	1102.61	-1.22	-0.00045	1.86301e+06	HCD (High Energy Collision Dissociation)	MS2	17.3804	60	6.1765	1299	20241018_FJ_VOLTA_MP_Easy15_45min_1891_DDA_200ng_11.raw	F3	2.76	1
FALSE	High	Sequest HT (A2)	Unambiguous	[K].EGVVAAAEKTK.[Q]		1	SYUA_HUMAN_P37840	SYUA_HUMAN_P37840	1	2	0.4312	0	1	1	551.811	1102.61	1102.61	4	0.0022	1.10312e+06	HCD (High Energy Collision Dissociation)	MS2	27.6579	60	6.2716	1173	20241018_FJ_VOLTA_MP_Easy15_45min_1891_DDA_200ng_9.raw	F5	2.76	1
FALSE	High	Sequest HT (A2)	Unambiguous	[K].EGVVAAAEK.[T]		1	SYUA_HUMAN_P37840	SYUA_HUMAN_P37840	0	2	0.5399	0	1	1	437.239	873.471	873.468	3.44	0.0015	2.57448e+06	HCD (High Energy Collision Dissociation)	MS2	13.0594	60	7.3612	1902	20241018_FJ_VOLTA_MP_Easy15_45min_1891_DDA_200ng_11.raw	F3	2.76	1
FALSE	High	Sequest HT (A2)	Unambiguous	[K].qGVAEAAGK.[T]	Q1(Deamidated)	1	SYUA_HUMAN_P37840	SYUA_HUMAN_P37840	0	2	0.4582	0	1	1	416.214	831.42	831.421	-0.26	-0.00011	2.38436e+06	HCD (High Energy Collision Dissociation)	MS2	5.89714	60	6.4053	1243	20241018_FJ_VOLTA_MP_Easy15_45min_1891_DDA_200ng_9.raw	F5	2.75	1
FALSE	High	Sequest HT (A2)	Unambiguous	[K].TVEGAGSiAAATGFVK.[K]	I8(Oxidation)	1	SYUA_HUMAN_P37840	SYUA_HUMAN_P37840	0	2	0.16	0	1	1	747.894	1494.78	1494.78	-0.01	-1e-05	360672	HCD (High Energy Collision Dissociation)	MS2	16.5594	60	24.2209	5511	20241018_FJ_VOLTA_MP_Easy15_45min_1891_DDA_200ng_1_241018150029.raw	F13	2.75	1
FALSE	High	Sequest HT (A2)	Unambiguous	[K].EGVVAAAEK.[T]		1	SYUA_HUMAN_P37840	SYUA_HUMAN_P37840	0	2	0.5438	0	1	1	437.239	873.471	873.468	4	0.00175	1720350848	HCD (High Energy Collision Dissociation)	MS2	3.33587	1.271	6.44	1259	20241018_FJ_VOLTA_MP_Easy15_45min_1891_DDA_200ng_9.raw	F5	2.74	1
FALSE	High	Sequest HT (A2)	Unambiguous	[K].TKEGVLYVGSK.[T]		1	SYUA_HUMAN_P37840	SYUA_HUMAN_P37840	1	2	0.7518	0	1	1	590.834	1180.66	1180.66	2.53	0.00149	1.81366e+06	HCD (High Energy Collision Dissociation)	MS2	1.9761	60	8.292	2085	20241018_FJ_VOLTA_MP_Easy15_45min_1891_DDA_200ng_9.raw	F5	2.74	1
FALSE	High	Sequest HT (A2)	Unambiguous	[K].EQVTnVGGAVVTGVTAVAQK.[T]	N5(Deamidated)	1	SYUA_HUMAN_P37840	SYUA_HUMAN_P37840	0	3	0.1241	0	1	1	643.682	1929.03	1929.03	1.51	0.00097	274153	HCD (High Energy Collision Dissociation)	MS2	19.5708	60	21.2095	7562	20241018_FJ_VOLTA_MP_Easy15_45min_1891_DDA_200ng_7.raw	F7	2.74	1
FALSE	High	Sequest HT (A2)	Unambiguous	[K].TVEGAGSIAAATGFVK.[K]		1	SYUA_HUMAN_P37840	SYUA_HUMAN_P37840	0	2	0.641	0	1	1	739.897	1478.79	1478.78	1.01	0.00075	575820	HCD (High Energy Collision Dissociation)	MS2	12.2654	60	25.1139	5942	20241018_FJ_VOLTA_MP_Easy15_45min_1891_DDA_200ng_1_241018150029.raw	F13	2.73	1
FALSE	High	Sequest HT (A2)	Unambiguous	[K].TVEGAGSIAAATGFVK.[K]		1	SYUA_HUMAN_P37840	SYUA_HUMAN_P37840	0	2	0.6117	0	1	1	739.897	1478.79	1478.78	0.93	0.00068	562920	HCD (High Energy Collision Dissociation)	MS2	4.43025	60	25.3871	10051	20241018_FJ_VOLTA_MP_Easy15_45min_1891_DDA_200ng_11.raw	F3	2.73	1
FALSE	High	Sequest HT (A2)	Unambiguous	[K].TKEQVTNVGGAVVTGvTAVAQK.[T]	V16(Oxidation)	1	SYUA_HUMAN_P37840	SYUA_HUMAN_P37840	1	3		0.0319	3	3	725.069	2173.19	2173.18	4.8	0.00348	293039	HCD (High Energy Collision Dissociation)	MS2	27.1718	60	14.7084	5160	20241018_FJ_VOLTA_MP_Easy15_45min_1891_DDA_200ng_11.raw	F3	2.73	1
FALSE	High	Sequest HT (A2)	Unambiguous	[K].TKEGVVHGVATVAEK.[T]		1	SYUA_HUMAN_P37840	SYUA_HUMAN_P37840	1	3	0.6875	0	1	1	508.954	1524.85	1524.84	5.65	0.00287	563919	HCD (High Energy Collision Dissociation)	MS2	12.9983	60	8.94	2575	20241018_FJ_VOLTA_MP_Easy15_45min_1891_DDA_200ng_11.raw	F3	2.72	1
FALSE	High	Sequest HT (A2)	Unambiguous	[K].EGVvHGvATVAEK.[T]	V4(Oxidation); V7(Oxidation)	1	SYUA_HUMAN_P37840	SYUA_HUMAN_P37840	0	2	0.0221	0	1	1	664.348	1327.69	1327.69	2.3	0.00153	1.97268e+06	HCD (High Energy Collision Dissociation)	MS2	3.4592	60	13.7594	4360	20241018_FJ_VOLTA_MP_Easy15_45min_1891_DDA_200ng_9.raw	F5	2.72	1
FALSE	High	Sequest HT (A2)	Unambiguous	[K].TVEGAGSIAAATGFVK.[K]		1	SYUA_HUMAN_P37840	SYUA_HUMAN_P37840	0	2	0.5735	0	1	1	739.897	1478.79	1478.78	1.26	0.00093	446739	HCD (High Energy Collision Dissociation)	MS2	2.28187	60	21.3547	6279	20241018_FJ_VOLTA_MP_Easy15_45min_1891_DDA_200ng_4.raw	F10	2.72	1
FALSE	High	Sequest HT (A2)	Unambiguous	[K].EGVLYVGSK.[T]		1	SYUA_HUMAN_P37840	SYUA_HUMAN_P37840	0	2	0.6618	0	1	1	476.263	951.519	951.515	5.07	0.00241	124131880	HCD (High Energy Collision Dissociation)	MS2	1.88921	22.858	11.7031	3466	20241018_FJ_VOLTA_MP_Easy15_45min_1891_DDA_200ng_8.raw	F6	2.72	1
FALSE	High	Sequest HT (A2)	Unambiguous	[K].EGVLYVGSK.[T]		1	SYUA_HUMAN_P37840	SYUA_HUMAN_P37840	0	2	0.6544	0	1	1	476.262	951.517	951.515	2.37	0.00113	3.30833e+06	HCD (High Energy Collision Dissociation)	MS2	3.61719	60	11.9488	3459	20241018_FJ_VOLTA_MP_Easy15_45min_1891_DDA_200ng_10.raw	F4	2.72	1
FALSE	High	Sequest HT (A2)	Unambiguous	[K].EGVVHGVATVAEK.[T]		1	SYUA_HUMAN_P37840	SYUA_HUMAN_P37840	0	3	0.4945	0	1	1	432.569	1295.69	1295.7	-1.14	-0.00049	732011	HCD (High Energy Collision Dissociation)	MS2	23.2138	60	21.8334	4323	20241018_FJ_VOLTA_MP_Easy15_45min_1891_DDA_200ng_1_241018150029.raw	F13	2.71	1
FALSE	High	Sequest HT (A2)	Unambiguous	[K].TVEGAGSIAAATGFVK.[K]		1	SYUA_HUMAN_P37840	SYUA_HUMAN_P37840	0	2	0.6421	0	1	1	739.897	1478.79	1478.78	1.42	0.00105	573630	HCD (High Energy Collision Dissociation)	MS2	18.4162	60	28.1243	11439	20241018_FJ_VOLTA_MP_Easy15_45min_1891_DDA_200ng_11.raw	F3	2.71	1
FALSE	High	Sequest HT (A2)	Unambiguous	[K].EGVLYVGSK.[T]		1	SYUA_HUMAN_P37840	SYUA_HUMAN_P37840	0	2	0.6074	0	1	1	476.266	951.524	951.515	9.69	0.00461	1325133952	HCD (High Energy Collision Dissociation)	MS2	1.70057	1.631	11.549	3696	20241018_FJ_VOLTA_MP_Easy15_45min_1891_DDA_200ng_11.raw	F3	2.7	1
FALSE	High	Sequest HT (A2)	Unambiguous	[K].TVEGAGSIAAATGFVK.[K]		1	SYUA_HUMAN_P37840	SYUA_HUMAN_P37840	0	2	0.7444	0	1	1	739.898	1478.79	1478.78	2.08	0.00154	805383	HCD (High Energy Collision Dissociation)	MS2	4.77484	60	21.6139	5443	20241018_FJ_VOLTA_MP_Easy15_45min_1891_DDA_200ng_13.raw	F1	2.7	1
FALSE	High	Sequest HT (A2)	Unambiguous	[K].EGVVHGVATVAEK.[T]		1	SYUA_HUMAN_P37840	SYUA_HUMAN_P37840	0	3	0.5688	0	1	1	432.571	1295.7	1295.7	2.32	0.001	734378	HCD (High Energy Collision Dissociation)	MS2	25.9511	60	10.6556	3163	20241018_FJ_VOLTA_MP_Easy15_45min_1891_DDA_200ng_7.raw	F7	2.69	1
FALSE	High	Sequest HT (A2)	Unambiguous	[K].qGVAEAAGK.[T]	Q1(Deamidated)	1	SYUA_HUMAN_P37840	SYUA_HUMAN_P37840	0	2	0.4907	0	1	1	416.214	831.42	831.421	-0.99	-0.00041	2.22233e+06	HCD (High Energy Collision Dissociation)	MS2	18.0953	60	6.3588	1383	20241018_FJ_VOLTA_MP_Easy15_45min_1891_DDA_200ng_12.raw	F2	2.69	1
FALSE	High	Sequest HT (A2)	Unambiguous	[K].EQVTNVGGAVVTGVTAVAQK.[T]		1	SYUA_HUMAN_P37840	SYUA_HUMAN_P37840	0	2	0.806	0	1	1	964.528	1928.05	1928.04	1.9	0.00183	544697	HCD (High Energy Collision Dissociation)	MS2	0	60	22.7843	7216	20241018_FJ_VOLTA_MP_Easy15_45min_1891_DDA_200ng_10.raw	F4	2.68	1
FALSE	High	Sequest HT (A2)	Unambiguous	[K].EGVVAAAEK.[T]		1	SYUA_HUMAN_P37840	SYUA_HUMAN_P37840	0	2	0.5858	0	1	1	437.237	873.468	873.468	0.02	1e-05	2913818	HCD (High Energy Collision Dissociation)	MS2	14.8159	60	6.4526	1238	20241018_FJ_VOLTA_MP_Easy15_45min_1891_DDA_200ng_5.raw	F9	2.68	1
FALSE	High	Sequest HT (A2)	Unambiguous	[K].qGVAEAAGK.[T]	Q1(Deamidated)	1	SYUA_HUMAN_P37840	SYUA_HUMAN_P37840	0	2	0.4682	0	1	1	416.214	831.421	831.421	0.4	0.00017	10057868	HCD (High Energy Collision Dissociation)	MS2	3.10685	60	6.3174	1299	20241018_FJ_VOLTA_MP_Easy15_45min_1891_DDA_200ng_7.raw	F7	2.67	1
FALSE	High	Sequest HT (A2)	Unambiguous	[K].EGVVAAAEK.[T]		1	SYUA_HUMAN_P37840	SYUA_HUMAN_P37840	0	2	0.4831	0	1	1	437.239	873.47	873.468	2.74	0.0012	1396360	HCD (High Energy Collision Dissociation)	MS2	38.4981	60	8.3047	2301	20241018_FJ_VOLTA_MP_Easy15_45min_1891_DDA_200ng_11.raw	F3	2.67	1
FALSE	High	Sequest HT (A2)	Unambiguous	[K].EGVLYVGSK.[T]		1	SYUA_HUMAN_P37840	SYUA_HUMAN_P37840	0	2	0.6292	0	1	1	476.26	951.513	951.515	-1.99	-0.00095	6560147	HCD (High Energy Collision Dissociation)	MS2	3.84431	60	12.0674	3735	20241018_FJ_VOLTA_MP_Easy15_45min_1891_DDA_200ng_7.raw	F7	2.67	1
FALSE	High	Sequest HT (A2)	Unambiguous	[K].EGVLYVGSK.[T]		1	SYUA_HUMAN_P37840	SYUA_HUMAN_P37840	0	2	0.588	0	1	1	476.264	951.521	951.515	6.67	0.00317	532822656	HCD (High Energy Collision Dissociation)	MS2	2.24802	3.784	22.9931	4884	20241018_FJ_VOLTA_MP_Easy15_45min_1891_DDA_200ng_1_241018150029.raw	F13	2.67	1
FALSE	High	Sequest HT (A2)	Unambiguous	[K].EGvvHGVATVAEK.[T]	V3(Oxidation); V4(Oxidation)	1	SYUA_HUMAN_P37840	SYUA_HUMAN_P37840	0	2		0.0221	2	2	664.348	1327.69	1327.69	2.3	0.00153	1.97268e+06	HCD (High Energy Collision Dissociation)	MS2	3.4592	60	13.7594	4360	20241018_FJ_VOLTA_MP_Easy15_45min_1891_DDA_200ng_9.raw	F5	2.66	1
FALSE	High	Sequest HT (A2)	Unambiguous	[K].EGVLYVGsK.[T]	S8(Oxidation)	1	SYUA_HUMAN_P37840	SYUA_HUMAN_P37840	0	2	0.015	0	1	1	484.257	967.508	967.509	-2	-0.00097	4.14742e+06	HCD (High Energy Collision Dissociation)	MS2	3.1721	60	11.3624	3333	20241018_FJ_VOLTA_MP_Easy15_45min_1891_DDA_200ng_9.raw	F5	2.66	1
FALSE	High	Sequest HT (A2)	Unambiguous	[K].TKEGVvHGVATVAEK.[T]	V6(Oxidation)	1	SYUA_HUMAN_P37840	SYUA_HUMAN_P37840	1	3		0.0466	2	2	514.284	1540.84	1540.83	3.86	0.00198	366927	HCD (High Energy Collision Dissociation)	MS2	0	60	9.1449	2522	20241018_FJ_VOLTA_MP_Easy15_45min_1891_DDA_200ng_7.raw	F7	2.66	1
FALSE	High	Sequest HT (A2)	Unambiguous	[K].qGVAEAAGK.[T]	Q1(Deamidated)	1	SYUA_HUMAN_P37840	SYUA_HUMAN_P37840	0	2	0.5	0	1	1	416.215	831.422	831.421	1.5	0.00062	886234	HCD (High Energy Collision Dissociation)	MS2	15.2793	60	6.3612	1205	20241018_FJ_VOLTA_MP_Easy15_45min_1891_DDA_200ng_3.raw	F11	2.66	1
FALSE	High	Sequest HT (A2)	Unambiguous	[K].EGVLYVGSK.[T]		1	SYUA_HUMAN_P37840	SYUA_HUMAN_P37840	0	2	0.6302	0	1	1	476.263	951.519	951.515	4.36	0.00208	1.58128e+06	HCD (High Energy Collision Dissociation)	MS2	15.9043	60	13.477	4589	20241018_FJ_VOLTA_MP_Easy15_45min_1891_DDA_200ng_11.raw	F3	2.65	1
FALSE	High	Sequest HT (A2)	Unambiguous	[K].TKEGVLYVGSK.[T]		1	SYUA_HUMAN_P37840	SYUA_HUMAN_P37840	1	2	0.7321	0	1	1	590.833	1180.66	1180.66	1.19	0.0007	664878	HCD (High Energy Collision Dissociation)	MS2	2.54657	60	8.2296	1910	20241018_FJ_VOLTA_MP_Easy15_45min_1891_DDA_200ng_3.raw	F11	2.65	1
FALSE	High	Sequest HT (A2)	Unambiguous	[K].TVEGAGSIAAATGFVK.[K]		1	SYUA_HUMAN_P37840	SYUA_HUMAN_P37840	0	2	0.6302	0	1	1	739.896	1478.78	1478.78	-0.31	-0.00023	296096	HCD (High Energy Collision Dissociation)	MS2	16.0034	60	20.9314	5974	20241018_FJ_VOLTA_MP_Easy15_45min_1891_DDA_200ng_2.raw	F12	2.65	1
FALSE	High	Sequest HT (A2)	Unambiguous	[K].tKEQVtNVGGAVVTGVTAVAQK.[T]	T1(Oxidation); T6(Oxidation)	1	SYUA_HUMAN_P37840	SYUA_HUMAN_P37840	1	3	0.0038	0	1	1	730.396	2189.17	2189.18	-1.05	-0.00077	485625	HCD (High Energy Collision Dissociation)	MS2	26.6788	60	22.5193	8640	20241018_FJ_VOLTA_MP_Easy15_45min_1891_DDA_200ng_11.raw	F3	2.65	1
FALSE	High	Sequest HT (A2)	Unambiguous	[K].EGVLYVGSK.[T]		1	SYUA_HUMAN_P37840	SYUA_HUMAN_P37840	0	2	0.6038	0	1	1	476.263	951.519	951.515	4.36	0.00208	23480408	HCD (High Energy Collision Dissociation)	MS2	2.46689	60	11.9864	3560	20241018_FJ_VOLTA_MP_Easy15_45min_1891_DDA_200ng_9.raw	F5	2.65	1
FALSE	High	Sequest HT (A2)	Unambiguous	[K].TKEQVTnVGGAVVTGVTAVAQK.[T]	N7(Deamidated)	1	SYUA_HUMAN_P37840	SYUA_HUMAN_P37840	1	3	1	0	1	1	720.063	2158.17	2158.17	1.49	0.00107	407688	HCD (High Energy Collision Dissociation)	MS2	11.1751	60	20.448	7142	20241018_FJ_VOLTA_MP_Easy15_45min_1891_DDA_200ng_8.raw	F6	2.65	1
FALSE	High	Sequest HT (A2)	Unambiguous	[K].TKEqVTNVGGAVVTGVTAVAQK.[T]	Q4(Deamidated)	1	SYUA_HUMAN_P37840	SYUA_HUMAN_P37840	1	3	1	0	1	2	720.063	2158.17	2158.17	1.49	0.00107	407688	HCD (High Energy Collision Dissociation)	MS2	11.1751	60	20.448	7142	20241018_FJ_VOLTA_MP_Easy15_45min_1891_DDA_200ng_8.raw	F6	2.65	1
FALSE	High	Sequest HT (A2)	Unambiguous	[K].EQVTNVGGAVVTGVTAVAQK.[T]		1	SYUA_HUMAN_P37840	SYUA_HUMAN_P37840	0	3	0.7424	0	1	1	643.355	1928.05	1928.04	2.65	0.0017	235468	HCD (High Energy Collision Dissociation)	MS2	0	60	21.9841	6737	20241018_FJ_VOLTA_MP_Easy15_45min_1891_DDA_200ng_3.raw	F11	2.64	1
FALSE	High	Sequest HT (A2)	Unambiguous	[K].TKEQvTNvGGAVVTGVTAVAQK.[T]	V5(Oxidation); V8(Oxidation)	1	SYUA_HUMAN_P37840	SYUA_HUMAN_P37840	1	3		0.0038	2	2	730.396	2189.17	2189.18	-1.05	-0.00077	485625	HCD (High Energy Collision Dissociation)	MS2	26.6788	60	22.5193	8640	20241018_FJ_VOLTA_MP_Easy15_45min_1891_DDA_200ng_11.raw	F3	2.64	1
FALSE	High	Sequest HT (A2)	Unambiguous	[K].EGVLYVGSKTK.[E]		1	SYUA_HUMAN_P37840	SYUA_HUMAN_P37840	1	2	0.7311	0	1	1	590.831	1180.66	1180.66	-1.71	-0.00101	5.28971e+06	HCD (High Energy Collision Dissociation)	MS2	0	60	21.6309	4224	20241018_FJ_VOLTA_MP_Easy15_45min_1891_DDA_200ng_1_241018150029.raw	F13	2.64	1
FALSE	High	Sequest HT (A2)	Selected	[R].MISGEMDVVLVPQGTLIEQIRcGGAGLGGFLTPtGVGtVVEEGK.[Q]	C22(Carbamidomethyl); T34(Oxidation); T38(Oxidation)	1	P76458	P76458	1	5	0.0303	0	1	1	901.666	4504.3	4504.28	5.55	0.005	3.82963e+06	HCD (High Energy Collision Dissociation)	MS2	0.954079	60	31.9145	13434	20241018_FJ_VOLTA_MP_Easy15_45min_1891_DDA_200ng_12.raw	F2	2.64	1
FALSE	High	Sequest HT (A2)	Unambiguous	[K].TKEGVLYVGSK.[T]		1	SYUA_HUMAN_P37840	SYUA_HUMAN_P37840	1	2	0.7452	0	1	1	590.834	1180.66	1180.66	2.22	0.00131	731889	HCD (High Energy Collision Dissociation)	MS2	0	60	8.1478	1812	20241018_FJ_VOLTA_MP_Easy15_45min_1891_DDA_200ng_13.raw	F1	2.63	1
FALSE	High	Sequest HT (A2)	Unambiguous	[K].EGVLYVGSK.[T]		1	SYUA_HUMAN_P37840	SYUA_HUMAN_P37840	0	2	0.616	0	1	1	476.26	951.514	951.515	-1.09	-0.00052	6327648	HCD (High Energy Collision Dissociation)	MS2	5.02685	60	11.482	3363	20241018_FJ_VOLTA_MP_Easy15_45min_1891_DDA_200ng_9.raw	F5	2.63	1
FALSE	High	Sequest HT (A2)	Unambiguous	[K].NEEGAPQEGILEDmPVDPDNEAYEmPSEEGYqDYEPEA.[-]	M14(Oxidation); M25(Oxidation); Q32(Deamidated)	1	SYUA_HUMAN_P37840	SYUA_HUMAN_P37840	0	3	0.0763	0	1	1	1440.58	4319.73	4319.71	5.83	0.00839	529340	HCD (High Energy Collision Dissociation)	MS2	0	60	29.5503	12185	20241018_FJ_VOLTA_MP_Easy15_45min_1891_DDA_200ng_11.raw	F3	2.62	1
FALSE	High	Sequest HT (A2)	Unambiguous	[K].TKEGVLYVGSK.[T]		1	SYUA_HUMAN_P37840	SYUA_HUMAN_P37840	1	3	0.4466	0	1	1	394.224	1180.66	1180.66	1.43	0.00056	1.75797e+06	HCD (High Energy Collision Dissociation)	MS2	25.0897	60	6.2422	1335	20241018_FJ_VOLTA_MP_Easy15_45min_1891_DDA_200ng_11.raw	F3	2.62	1
FALSE	High	Sequest HT (A2)	Unambiguous	[K].TKEqVTnVGGAVVTGVTAVAQK.[T]	Q4(Oxidation); N7(Oxidation)	1	SYUA_HUMAN_P37840	SYUA_HUMAN_P37840	1	3		0.0113	3	3	730.396	2189.17	2189.18	-1.05	-0.00077	485625	HCD (High Energy Collision Dissociation)	MS2	26.6788	60	22.5193	8640	20241018_FJ_VOLTA_MP_Easy15_45min_1891_DDA_200ng_11.raw	F3	2.62	1
FALSE	High	Sequest HT (A2)	Unambiguous	[K].EGVLYVGSk.[T]	K9(Oxidation)	1	SYUA_HUMAN_P37840	SYUA_HUMAN_P37840	0	2		0.015	2	2	484.257	967.508	967.509	-2	-0.00097	4.14742e+06	HCD (High Energy Collision Dissociation)	MS2	3.1721	60	11.3624	3333	20241018_FJ_VOLTA_MP_Easy15_45min_1891_DDA_200ng_9.raw	F5	2.62	1
FALSE	High	Sequest HT (A2)	Unambiguous	[K].TKEQVTNVGGAVVTGVTAVAQK.[T]		1	SYUA_HUMAN_P37840	SYUA_HUMAN_P37840	1	3	0.6756	0	1	1	719.735	2157.19	2157.19	1.15	0.00083	134396	HCD (High Energy Collision Dissociation)	MS2	50.7781	60	18.6296	5994	20241018_FJ_VOLTA_MP_Easy15_45min_1891_DDA_200ng_5.raw	F9	2.62	1
FALSE	High	Sequest HT (A2)	Unambiguous	[K].EGVLYVGSK.[T]		1	SYUA_HUMAN_P37840	SYUA_HUMAN_P37840	0	2	0.6183	0	1	1	476.26	951.514	951.515	-1.09	-0.00052	4.42804e+06	HCD (High Energy Collision Dissociation)	MS2	22.9986	60	11.5613	3506	20241018_FJ_VOLTA_MP_Easy15_45min_1891_DDA_200ng_7.raw	F7	2.62	1
FALSE	High	Sequest HT (A2)	Unambiguous	[K].EGVVAAAEK.[T]		1	SYUA_HUMAN_P37840	SYUA_HUMAN_P37840	0	2	0.4981	0	1	1	437.237	873.467	873.468	-0.19	-8e-05	1.77744e+06	HCD (High Energy Collision Dissociation)	MS2	18.4421	60	7.8663	2115	20241018_FJ_VOLTA_MP_Easy15_45min_1891_DDA_200ng_11.raw	F3	2.61	1
FALSE	High	Sequest HT (A2)	Unambiguous	[K].EGVVHGVATVAEK.[T]		1	SYUA_HUMAN_P37840	SYUA_HUMAN_P37840	0	3	0.5211	0	1	1	432.57	1295.7	1295.7	0.55	0.00024	463847	HCD (High Energy Collision Dissociation)	MS2	19.0546	60	7.7754	1744	20241018_FJ_VOLTA_MP_Easy15_45min_1891_DDA_200ng_4.raw	F10	2.61	1
FALSE	High	Sequest HT (A2)	Unambiguous	[K].DQIIEAVAAmSVmDVVELISAmEEK.[F]	M10(Oxidation); M13(Oxidation); M22(Oxidation)	2	C5A0S6	C5A0S6; B7MRB2	0	3	0.1149	0	1	1	923.783	2769.33	2769.32	3.63	0.00335	198705	HCD (High Energy Collision Dissociation)	MS2	7.56274	60	37.1808	15136	20241018_FJ_VOLTA_MP_Easy15_45min_1891_DDA_200ng_7.raw	F7	2.61	1
FALSE	High	Sequest HT (A2)	Unambiguous	[K].TkeQVTNVGGAVVTGVTAVAQK.[T]	K2(Oxidation); E3(Oxidation)	1	SYUA_HUMAN_P37840	SYUA_HUMAN_P37840	1	3		0.0189	4	4	730.396	2189.17	2189.18	-1.05	-0.00077	485625	HCD (High Energy Collision Dissociation)	MS2	26.6788	60	22.5193	8640	20241018_FJ_VOLTA_MP_Easy15_45min_1891_DDA_200ng_11.raw	F3	2.6	1
FALSE	High	Sequest HT (A2)	Unambiguous	[R].GEVLAVGnGR.[I]	N8(Deamidated)	1	B1XDP6	B1XDP6	0	2	0.1705	0	1	1	486.759	972.511	972.511	0.47	0.00023	1.10794e+06	HCD (High Energy Collision Dissociation)	MS2	1.88717	60	10.7773	3212	20241018_FJ_VOLTA_MP_Easy15_45min_1891_DDA_200ng_7.raw	F7	2.58	1
FALSE	High	Sequest HT (A2)	Unambiguous	[K].TVEGAGSIAAATGFVK.[K]		1	SYUA_HUMAN_P37840	SYUA_HUMAN_P37840	0	2	0.624	0	1	1	739.899	1478.79	1478.78	3.24	0.00239	378761	HCD (High Energy Collision Dissociation)	MS2	50.4847	60	20.4436	7702	20241018_FJ_VOLTA_MP_Easy15_45min_1891_DDA_200ng_12.raw	F2	2.58	1
FALSE	High	Sequest HT (A2)	Unambiguous	[R].GEVLAVGnGR.[I]	N8(Deamidated)	1	B1XDP6	B1XDP6	0	2	0.1395	0	1	1	486.76	972.513	972.511	1.72	0.00084	4.02031e+06	HCD (High Energy Collision Dissociation)	MS2	6.86742	60	10.7296	3367	20241018_FJ_VOLTA_MP_Easy15_45min_1891_DDA_200ng_11.raw	F3	2.58	1
FALSE	High	Sequest HT (A2)	Unambiguous	[K].TVEGAGSIAAATGFVK.[K]		1	SYUA_HUMAN_P37840	SYUA_HUMAN_P37840	0	2	0.6628	0	1	1	739.899	1478.79	1478.78	3.9	0.00288	502876	HCD (High Energy Collision Dissociation)	MS2	5.44367	60	24.8752	9801	20241018_FJ_VOLTA_MP_Easy15_45min_1891_DDA_200ng_11.raw	F3	2.58	1
FALSE	High	Sequest HT (A2)	Unambiguous	[K].YDAVIALGTVIR.[G]		2	B1LJG5	B1LJG5; B7MD73	0	2	0.686	0	1	1	645.876	1290.74	1290.74	2	0.00129	316268	HCD (High Energy Collision Dissociation)	MS2	24.8767	60	27.5414	11137	20241018_FJ_VOLTA_MP_Easy15_45min_1891_DDA_200ng_11.raw	F3	2.58	1
FALSE	High	Sequest HT (A2)	Unambiguous	[K].qGVAEAAGK.[T]	Q1(Deamidated)	1	SYUA_HUMAN_P37840	SYUA_HUMAN_P37840	0	2	0.5194	0	1	1	416.214	831.42	831.421	-0.99	-0.00041	692104	HCD (High Energy Collision Dissociation)	MS2	17.2697	60	6.3883	1223	20241018_FJ_VOLTA_MP_Easy15_45min_1891_DDA_200ng_4.raw	F10	2.58	1
FALSE	High	Sequest HT (A2)	Unambiguous	[K].EGVVhGVATVAEK.[T]	H5(Oxidation)	1	SYUA_HUMAN_P37840	SYUA_HUMAN_P37840	0	2	0.0349	0	1	1	656.35	1311.69	1311.69	1.43	0.00094	417130	HCD (High Energy Collision Dissociation)	MS2	25.2182	60	10.8008	3101	20241018_FJ_VOLTA_MP_Easy15_45min_1891_DDA_200ng_9.raw	F5	2.58	1
FALSE	High	Sequest HT (A2)	Unambiguous	[K].ALEEAGAEVEVK.[-]		2	C5A0S6	C5A0S6; B7MRB2	0	2	0.6667	0	1	1	622.82	1244.63	1244.64	-3.03	-0.00188	930991	HCD (High Energy Collision Dissociation)	MS2	0	60	11.48	3481	20241018_FJ_VOLTA_MP_Easy15_45min_1891_DDA_200ng_7.raw	F7	2.58	1
FALSE	High	Sequest HT (A2)	Unambiguous	[K].EQVTnVGGAVVTGVTAvAQK.[T]	N5(Deamidated); V17(Oxidation)	1	SYUA_HUMAN_P37840	SYUA_HUMAN_P37840	0	3	0.0039	0	1	1	649.019	1945.04	1945.02	9.72	0.0063	788510	HCD (High Energy Collision Dissociation)	MS2	52.6663	60	18.7473	6452	20241018_FJ_VOLTA_MP_Easy15_45min_1891_DDA_200ng_9.raw	F5	2.57	1
FALSE	High	Sequest HT (A2)	Unambiguous	[K].TKEGVVHGVATVAEK.[T]		1	SYUA_HUMAN_P37840	SYUA_HUMAN_P37840	1	3	0.6381	0	1	1	508.952	1524.84	1524.84	2.47	0.00126	290871	HCD (High Energy Collision Dissociation)	MS2	12.9144	60	7.3571	1687	20241018_FJ_VOLTA_MP_Easy15_45min_1891_DDA_200ng_9.raw	F5	2.57	1
FALSE	High	Sequest HT (A2)	Unambiguous	[K].TKEqVTnVGGAVVTGVTAVAqK.[T]	Q4(Deamidated); N7(Deamidated); Q21(Deamidated)	1	SYUA_HUMAN_P37840	SYUA_HUMAN_P37840	1	3	0.6031	0	1	1	720.719	2160.14	2160.14	0.97	0.0007	309817	HCD (High Energy Collision Dissociation)	MS2	2.46208	60	22.5904	5725	20241018_FJ_VOLTA_MP_Easy15_45min_1891_DDA_200ng_13.raw	F1	2.57	1
FALSE	High	Sequest HT (A2)	Unambiguous	[K].EGVLYVGSKTK.[E]		1	SYUA_HUMAN_P37840	SYUA_HUMAN_P37840	1	2	0.6459	0	1	1	590.831	1180.65	1180.66	-2.43	-0.00144	2147022	HCD (High Energy Collision Dissociation)	MS2	0	60	7.6335	2013	20241018_FJ_VOLTA_MP_Easy15_45min_1891_DDA_200ng_11.raw	F3	2.57	1
FALSE	High	Sequest HT (A2)	Unambiguous	[K].TVEGAGSIAAATGFVK.[K]		1	SYUA_HUMAN_P37840	SYUA_HUMAN_P37840	0	3	0.7354	0	1	1	493.602	1478.79	1478.78	3.45	0.0017	1.21422e+06	HCD (High Energy Collision Dissociation)	MS2	11.5424	60	21.7736	8265	20241018_FJ_VOLTA_MP_Easy15_45min_1891_DDA_200ng_11.raw	F3	2.57	1
FALSE	High	Sequest HT (A2)	Unambiguous	[K].EQVTnVGGAVVTGVtAVAQK.[T]	N5(Deamidated); T15(Oxidation)	1	SYUA_HUMAN_P37840	SYUA_HUMAN_P37840	0	3		0.0039	2	2	649.019	1945.04	1945.02	9.72	0.0063	788510	HCD (High Energy Collision Dissociation)	MS2	52.6663	60	18.7473	6452	20241018_FJ_VOLTA_MP_Easy15_45min_1891_DDA_200ng_9.raw	F5	2.56	1
FALSE	High	Sequest HT (A2)	Unambiguous	[K].EGVLYvGSK.[T]	V6(Oxidation)	1	SYUA_HUMAN_P37840	SYUA_HUMAN_P37840	0	2		0.0414	3	3	484.257	967.508	967.509	-2	-0.00097	4.14742e+06	HCD (High Energy Collision Dissociation)	MS2	3.1721	60	11.3624	3333	20241018_FJ_VOLTA_MP_Easy15_45min_1891_DDA_200ng_9.raw	F5	2.55	1
FALSE	High	Sequest HT (A2)	Unambiguous	[K].EQVTnVGGAVVTGvTAVAQK.[T]	N5(Deamidated); V14(Oxidation)	1	SYUA_HUMAN_P37840	SYUA_HUMAN_P37840	0	3		0.0078	3	3	649.019	1945.04	1945.02	9.72	0.0063	788510	HCD (High Energy Collision Dissociation)	MS2	52.6663	60	18.7473	6452	20241018_FJ_VOLTA_MP_Easy15_45min_1891_DDA_200ng_9.raw	F5	2.55	1
FALSE	High	Sequest HT (A2)	Unambiguous	[K].EGVVHGVATVAEK.[T]		1	SYUA_HUMAN_P37840	SYUA_HUMAN_P37840	0	3	0.4784	0	1	1	432.57	1295.7	1295.7	0.48	0.00021	1.02283e+06	HCD (High Energy Collision Dissociation)	MS2	6.32088	60	8.5002	2398	20241018_FJ_VOLTA_MP_Easy15_45min_1891_DDA_200ng_12.raw	F2	2.55	1
FALSE	High	Sequest HT (A2)	Unambiguous	[K].TVEGAGSIAAATGFVK.[K]		1	SYUA_HUMAN_P37840	SYUA_HUMAN_P37840	0	2	0.6142	0	1	1	739.897	1478.79	1478.78	1.75	0.00129	398494	HCD (High Energy Collision Dissociation)	MS2	8.46309	60	26.9382	10827	20241018_FJ_VOLTA_MP_Easy15_45min_1891_DDA_200ng_11.raw	F3	2.54	1
FALSE	High	Sequest HT (A2)	Unambiguous	[K].EGVVHGVATVAEK.[T]		1	SYUA_HUMAN_P37840	SYUA_HUMAN_P37840	0	3	0.4724	0	1	1	432.57	1295.7	1295.7	0.63	0.00027	1474003	HCD (High Energy Collision Dissociation)	MS2	15.6784	60	8.6085	2297	20241018_FJ_VOLTA_MP_Easy15_45min_1891_DDA_200ng_7.raw	F7	2.54	1
FALSE	High	Sequest HT (A2)	Unambiguous	[K].TVEGAGSIAAATGFVK.[K]		1	SYUA_HUMAN_P37840	SYUA_HUMAN_P37840	0	2	0.7047	0	1	1	739.899	1478.79	1478.78	3.24	0.00239	359345	HCD (High Energy Collision Dissociation)	MS2	0	60	32.8622	13843	20241018_FJ_VOLTA_MP_Easy15_45min_1891_DDA_200ng_11.raw	F3	2.54	1
FALSE	High	Sequest HT (A2)	Unambiguous	[K].FGVSAAAAVAVAAGPVEAAEEK.[T]		1	C5A0S6	C5A0S6	0	2	0.6957	0	1	1	1008.03	2015.05	2015.04	3.01	0.00303	550252	HCD (High Energy Collision Dissociation)	MS2	8.7881	60	28.4659	11628	20241018_FJ_VOLTA_MP_Easy15_45min_1891_DDA_200ng_12.raw	F2	2.53	1
FALSE	High	Sequest HT (A2)	Unambiguous	[K].EGVVAAAEK.[T]		1	SYUA_HUMAN_P37840	SYUA_HUMAN_P37840	0	2	0.5455	0	1	1	437.238	873.47	873.468	2.25	0.00098	962994	HCD (High Energy Collision Dissociation)	MS2	10.3342	60	8.1583	2031	20241018_FJ_VOLTA_MP_Easy15_45min_1891_DDA_200ng_9.raw	F5	2.53	1
FALSE	High	Sequest HT (A2)	Unambiguous	[K].EGVVAAAEKTK.[Q]		1	SYUA_HUMAN_P37840	SYUA_HUMAN_P37840	1	3	0.4664	0	1	1	368.208	1102.61	1102.61	-0.14	-5e-05	583444	HCD (High Energy Collision Dissociation)	MS2	2.56042	60	6.2183	1158	20241018_FJ_VOLTA_MP_Easy15_45min_1891_DDA_200ng_13.raw	F1	2.53	1
FALSE	High	Sequest HT (A2)	Unambiguous	[K].EGVLYVGSK.[T]		1	SYUA_HUMAN_P37840	SYUA_HUMAN_P37840	0	2	0.6151	0	1	1	476.261	951.516	951.515	1.03	0.00049	2.39494e+06	HCD (High Energy Collision Dissociation)	MS2	1.16711	60	12.1801	3075	20241018_FJ_VOLTA_MP_Easy15_45min_1891_DDA_200ng_2.raw	F12	2.52	1
FALSE	High	Sequest HT (A2)	Unambiguous	[K].TVEGAGSIAAATGFVK.[K]		1	SYUA_HUMAN_P37840	SYUA_HUMAN_P37840	0	2	0.5754	0	1	1	739.898	1478.79	1478.78	3.15	0.00233	332437	HCD (High Energy Collision Dissociation)	MS2	8.52947	60	31.318	13084	20241018_FJ_VOLTA_MP_Easy15_45min_1891_DDA_200ng_11.raw	F3	2.52	1
FALSE	High	Sequest HT (A2)	Unambiguous	[K].TVEGAGSIAAATGFVK.[K]		1	SYUA_HUMAN_P37840	SYUA_HUMAN_P37840	0	2	0.6786	0	1	1	739.898	1478.79	1478.78	3.15	0.00233	828826	HCD (High Energy Collision Dissociation)	MS2	25.5722	60	13.4112	4192	20241018_FJ_VOLTA_MP_Easy15_45min_1891_DDA_200ng_9.raw	F5	2.52	1
FALSE	High	Sequest HT (A2)	Unambiguous	[K].EQVTnVGGAVVTGVTAVAQK.[T]	N5(Deamidated)	1	SYUA_HUMAN_P37840	SYUA_HUMAN_P37840	0	3	0.0924	0	1	1	643.683	1929.03	1929.03	2.45	0.00158	281723	HCD (High Energy Collision Dissociation)	MS2	5.61175	60	24.9823	9059	20241018_FJ_VOLTA_MP_Easy15_45min_1891_DDA_200ng_8.raw	F6	2.49	1
FALSE	High	Sequest HT (A2)	Unambiguous	[K].EGVvHGVATVAEK.[T]	V4(Oxidation)	1	SYUA_HUMAN_P37840	SYUA_HUMAN_P37840	0	2		0.0349	2	2	656.35	1311.69	1311.69	1.43	0.00094	417130	HCD (High Energy Collision Dissociation)	MS2	25.2182	60	10.8008	3101	20241018_FJ_VOLTA_MP_Easy15_45min_1891_DDA_200ng_9.raw	F5	2.49	1
FALSE	High	Sequest HT (A2)	Unambiguous	[K].qGVAEAAGK.[T]	Q1(Deamidated)	1	SYUA_HUMAN_P37840	SYUA_HUMAN_P37840	0	2	0.4578	0	1	1	416.214	831.421	831.421	0.18	8e-05	1.07282e+06	HCD (High Energy Collision Dissociation)	MS2	14.2619	60	6.3683	1194	20241018_FJ_VOLTA_MP_Easy15_45min_1891_DDA_200ng_6.raw	F8	2.49	1
FALSE	High	Sequest HT (A2)	Unambiguous	[K].AKEGVVAAAEK.[T]		1	SYUA_HUMAN_P37840	SYUA_HUMAN_P37840	1	3	0.5323	0	1	1	358.205	1072.6	1072.6	1.68	0.0006	833945	HCD (High Energy Collision Dissociation)	MS2	22.2575	60	6.7641	1598	20241018_FJ_VOLTA_MP_Easy15_45min_1891_DDA_200ng_11.raw	F3	2.48	1
FALSE	High	Sequest HT (A2)	Unambiguous	[K].TVEGAGSIAAATGFVK.[K]		1	SYUA_HUMAN_P37840	SYUA_HUMAN_P37840	0	2	0.6774	0	1	1	739.897	1478.79	1478.78	1.59	0.00117	629034	HCD (High Energy Collision Dissociation)	MS2	11.0917	60	23.6908	8600	20241018_FJ_VOLTA_MP_Easy15_45min_1891_DDA_200ng_9.raw	F5	2.48	1
FALSE	High	Sequest HT (A2)	Unambiguous	[K].TVEGAGSIAAATGFVK.[K]		1	SYUA_HUMAN_P37840	SYUA_HUMAN_P37840	0	3	0.7016	0	1	1	493.601	1478.79	1478.78	2.77	0.00137	756126	HCD (High Energy Collision Dissociation)	MS2	3.39383	60	21.5771	7665	20241018_FJ_VOLTA_MP_Easy15_45min_1891_DDA_200ng_9.raw	F5	2.48	1
FALSE	High	Sequest HT (A2)	Unambiguous	[K].TVEGAGSIAAATGFVK.[K]		1	SYUA_HUMAN_P37840	SYUA_HUMAN_P37840	0	3	0.7177	0	1	1	493.601	1478.79	1478.78	2.9	0.00143	393962	HCD (High Energy Collision Dissociation)	MS2	46.6104	60	20.7481	7774	20241018_FJ_VOLTA_MP_Easy15_45min_1891_DDA_200ng_11.raw	F3	2.48	1
FALSE	High	Sequest HT (A2)	Unambiguous	[K].TVEGAGSIAAATGFVK.[K]		1	SYUA_HUMAN_P37840	SYUA_HUMAN_P37840	0	2	0.6721	0	1	1	739.899	1478.79	1478.78	4.56	0.00337	434872	HCD (High Energy Collision Dissociation)	MS2	33.8544	60	30.7945	12821	20241018_FJ_VOLTA_MP_Easy15_45min_1891_DDA_200ng_11.raw	F3	2.47	1
FALSE	High	Sequest HT (A2)	Unambiguous	[K].TKEGVVHGVATVAEK.[T]		1	SYUA_HUMAN_P37840	SYUA_HUMAN_P37840	1	3	0.6761	0	1	1	508.953	1524.84	1524.84	3.31	0.00168	364578	HCD (High Energy Collision Dissociation)	MS2	30.1633	60	9.4504	2812	20241018_FJ_VOLTA_MP_Easy15_45min_1891_DDA_200ng_11.raw	F3	2.47	1
FALSE	High	Sequest HT (A2)	Unambiguous	[K].TKEGVLYVGSK.[T]		1	SYUA_HUMAN_P37840	SYUA_HUMAN_P37840	1	3	0.583	0	1	1	394.224	1180.66	1180.66	0.81	0.00032	654988	HCD (High Energy Collision Dissociation)	MS2	2.93286	60	8.379	1856	20241018_FJ_VOLTA_MP_Easy15_45min_1891_DDA_200ng_2.raw	F12	2.47	1
FALSE	High	Sequest HT (A2)	Unambiguous	[K].TKEQVTNVGGAVVTGVTAVAQK.[T]		1	SYUA_HUMAN_P37840	SYUA_HUMAN_P37840	1	3	0.6235	0	1	1	719.736	2157.19	2157.19	2.93	0.00211	305220	HCD (High Energy Collision Dissociation)	MS2	3.17306	60	19.1129	4753	20241018_FJ_VOLTA_MP_Easy15_45min_1891_DDA_200ng_13.raw	F1	2.47	1
FALSE	High	Sequest HT (A2)	Unambiguous	[K].TVEGAGSIAAATGFVK.[K]		1	SYUA_HUMAN_P37840	SYUA_HUMAN_P37840	0	2	0.6518	0	1	1	739.897	1478.79	1478.78	1.17	0.00087	395089	HCD (High Energy Collision Dissociation)	MS2	0	60	22.1857	6805	20241018_FJ_VOLTA_MP_Easy15_45min_1891_DDA_200ng_3.raw	F11	2.47	1
FALSE	High	Sequest HT (A2)	Unambiguous	[K].TVEGAGSIAAATGFVK.[K]		1	SYUA_HUMAN_P37840	SYUA_HUMAN_P37840	0	2	0.7004	0	1	1	739.899	1478.79	1478.78	3.32	0.00245	792787	HCD (High Energy Collision Dissociation)	MS2	4.73307	60	24.3675	9544	20241018_FJ_VOLTA_MP_Easy15_45min_1891_DDA_200ng_11.raw	F3	2.47	1
FALSE	High	Sequest HT (A2)	Unambiguous	[K].EqVTNVGGAVVTGVTAVAqK.[T]	Q2(Deamidated); Q19(Deamidated)	1	SYUA_HUMAN_P37840	SYUA_HUMAN_P37840	0	3	0.6599	0	1	1	644.01	1930.02	1930.01	1.41	0.0009	248223	HCD (High Energy Collision Dissociation)	MS2	4.58044	60	26.118	6687	20241018_FJ_VOLTA_MP_Easy15_45min_1891_DDA_200ng_13.raw	F1	2.47	1
FALSE	High	Sequest HT (A2)	Unambiguous	[K].TKEGVlYVGSK.[T]	L6(Oxidation)	1	SYUA_HUMAN_P37840	SYUA_HUMAN_P37840	1	3	0.1341	0	1	1	399.556	1196.65	1196.65	2.32	0.00093	1.32955e+06	HCD (High Energy Collision Dissociation)	MS2	8.30123	60	6.3233	1378	20241018_FJ_VOLTA_MP_Easy15_45min_1891_DDA_200ng_11.raw	F3	2.46	1
FALSE	High	Sequest HT (A2)	Unambiguous	[K].EGVLYVGSK.[T]		1	SYUA_HUMAN_P37840	SYUA_HUMAN_P37840	0	2	0.6179	0	1	1	476.264	951.52	951.515	5.45	0.00259	1.96184e+06	HCD (High Energy Collision Dissociation)	MS2	2.05132	60	12.9674	4346	20241018_FJ_VOLTA_MP_Easy15_45min_1891_DDA_200ng_11.raw	F3	2.46	1
FALSE	High	Sequest HT (A2)	Unambiguous	[K].TVEGAGSIAAATGFVK.[K]		1	SYUA_HUMAN_P37840	SYUA_HUMAN_P37840	0	2	0.5244	0	1	1	739.898	1478.79	1478.78	2	0.00148	311509	HCD (High Energy Collision Dissociation)	MS2	11.4953	60	18.0839	6619	20241018_FJ_VOLTA_MP_Easy15_45min_1891_DDA_200ng_11.raw	F3	2.46	1
FALSE	High	Sequest HT (A2)	Unambiguous	[R].ILEnGEVKPLDVK.[V]	N4(Deamidated)	1	B1XDP6	B1XDP6	0	3	0.6057	0	1	1	485.61	1454.81	1454.81	2.84	0.00138	726094	HCD (High Energy Collision Dissociation)	MS2	10.5678	60	23.4149	5098	20241018_FJ_VOLTA_MP_Easy15_45min_1891_DDA_200ng_1_241018150029.raw	F13	2.46	1
FALSE	High	Sequest HT (A2)	Unambiguous	[K].EGVvHGvATVAEK.[T]	V4(Oxidation); V7(Oxidation)	1	SYUA_HUMAN_P37840	SYUA_HUMAN_P37840	0	2	0.0569	0	1	1	664.347	1327.69	1327.69	1.57	0.00104	3.2598e+06	HCD (High Energy Collision Dissociation)	MS2	2.02811	60	13.2467	4117	20241018_FJ_VOLTA_MP_Easy15_45min_1891_DDA_200ng_9.raw	F5	2.46	1
FALSE	High	Sequest HT (A2)	Unambiguous	[K].TVEGAGSIAAATGFVK.[K]		1	SYUA_HUMAN_P37840	SYUA_HUMAN_P37840	0	2	0.6367	0	1	1	739.899	1478.79	1478.78	3.65	0.0027	490927	HCD (High Energy Collision Dissociation)	MS2	0	60	29.7797	12306	20241018_FJ_VOLTA_MP_Easy15_45min_1891_DDA_200ng_11.raw	F3	2.45	1
FALSE	High	Sequest HT (A2)	Unambiguous	[K].EQVTnVGGAVVTGVTAVAQK.[T]	N5(Deamidated)	1	SYUA_HUMAN_P37840	SYUA_HUMAN_P37840	0	3	0.1224	0	1	1	643.687	1929.05	1929.03	9.76	0.00628	164915	HCD (High Energy Collision Dissociation)	MS2	21.1894	60	25.0163	9874	20241018_FJ_VOLTA_MP_Easy15_45min_1891_DDA_200ng_11.raw	F3	2.45	1
FALSE	High	Sequest HT (A2)	Unambiguous	[K].YDAVIALGTVIR.[G]		2	B1LJG5	B1LJG5; B7MD73	0	2	0.6367	0	1	1	645.877	1290.75	1290.74	4.36	0.00281	395736	HCD (High Energy Collision Dissociation)	MS2	15.1042	60	27.9043	11338	20241018_FJ_VOLTA_MP_Easy15_45min_1891_DDA_200ng_12.raw	F2	2.45	1
FALSE	High	Sequest HT (A2)	Unambiguous	[K].EGVVHGVATVAEK.[T]		1	SYUA_HUMAN_P37840	SYUA_HUMAN_P37840	0	2	0.3361	0	1	1	648.352	1295.7	1295.7	0.92	0.00059	386902	HCD (High Energy Collision Dissociation)	MS2	4.94037	60	7.2459	1842	20241018_FJ_VOLTA_MP_Easy15_45min_1891_DDA_200ng_11.raw	F3	2.44	1
FALSE	High	Sequest HT (A2)	Unambiguous	[K].EGVVHGVATVAEK.[T]		1	SYUA_HUMAN_P37840	SYUA_HUMAN_P37840	0	3	0.465	0	1	1	432.571	1295.7	1295.7	2.67	0.00116	615279	HCD (High Energy Collision Dissociation)	MS2	15.5021	60	9.1251	2514	20241018_FJ_VOLTA_MP_Easy15_45min_1891_DDA_200ng_7.raw	F7	2.43	1
FALSE	High	Sequest HT (A2)	Unambiguous	[K].EqVTNVGGAVVTGVTAVAqK.[T]	Q2(Deamidated); Q19(Deamidated)	1	SYUA_HUMAN_P37840	SYUA_HUMAN_P37840	0	3	0.7407	0	1	1	644.01	1930.02	1930.01	2.07	0.00133	330725	HCD (High Energy Collision Dissociation)	MS2	4.85975	60	26.2419	8345	20241018_FJ_VOLTA_MP_Easy15_45min_1891_DDA_200ng_3.raw	F11	2.43	1
FALSE	High	Sequest HT (A2)	Unambiguous	[K].EGVLYVGSK.[T]		1	SYUA_HUMAN_P37840	SYUA_HUMAN_P37840	0	2	0.6214	0	1	1	476.263	951.519	951.515	4.81	0.00229	578691	HCD (High Energy Collision Dissociation)	MS2	18.9502	60	13.9851	4822	20241018_FJ_VOLTA_MP_Easy15_45min_1891_DDA_200ng_11.raw	F3	2.43	1
FALSE	High	Sequest HT (A2)	Unambiguous	[K].TVEGAGSIAAATGFVK.[K]		1	SYUA_HUMAN_P37840	SYUA_HUMAN_P37840	0	2	0.6996	0	1	1	739.898	1478.79	1478.78	2.91	0.00215	563190	HCD (High Energy Collision Dissociation)	MS2	6.06503	60	30.2875	12562	20241018_FJ_VOLTA_MP_Easy15_45min_1891_DDA_200ng_11.raw	F3	2.43	1
FALSE	High	Sequest HT (A2)	Unambiguous	[K].SAGGIVLTGSAAAK.[S]		1	B1XDP6	B1XDP6	0	2	0.5909	0	1	1	601.84	1202.67	1202.67	-1.26	-0.00076	390722	HCD (High Energy Collision Dissociation)	MS2	38.213	60	22.7022	4759	20241018_FJ_VOLTA_MP_Easy15_45min_1891_DDA_200ng_1_241018150029.raw	F13	2.42	1
FALSE	High	Sequest HT (A2)	Unambiguous	[K].TVEGAGSIAAATGFVK.[K]		1	SYUA_HUMAN_P37840	SYUA_HUMAN_P37840	0	2	0.6405	0	1	1	739.897	1478.79	1478.78	1.17	0.00087	286969	HCD (High Energy Collision Dissociation)	MS2	29.2791	60	24.6029	9002	20241018_FJ_VOLTA_MP_Easy15_45min_1891_DDA_200ng_9.raw	F5	2.42	1
FALSE	High	Sequest HT (A2)	Unambiguous	[K].TKEGVvHGvATVAEK.[T]	V6(Oxidation); V9(Oxidation)	1	SYUA_HUMAN_P37840	SYUA_HUMAN_P37840	1	3	0.0996	0	1	1	519.616	1556.83	1556.83	4.46	0.00232	3.2912e+06	HCD (High Energy Collision Dissociation)	MS2	36.9669	60	7.1832	1811	20241018_FJ_VOLTA_MP_Easy15_45min_1891_DDA_200ng_11.raw	F3	2.41	1
FALSE	High	Sequest HT (A2)	Unambiguous	[K].AKEGVVAAAEK.[T]		1	SYUA_HUMAN_P37840	SYUA_HUMAN_P37840	1	3	0.5851	0	1	1	358.205	1072.6	1072.6	2.02	0.00072	390970	HCD (High Energy Collision Dissociation)	MS2	11.1036	60	7.2811	1860	20241018_FJ_VOLTA_MP_Easy15_45min_1891_DDA_200ng_11.raw	F3	2.41	1
FALSE	High	Sequest HT (A2)	Unambiguous	[K].TVEGAGSIAAATGFVK.[K]		1	SYUA_HUMAN_P37840	SYUA_HUMAN_P37840	0	2	0.5583	0	1	1	739.897	1478.79	1478.78	1.34	0.00099	837141	HCD (High Energy Collision Dissociation)	MS2	1.65292	60	24.6102	5706	20241018_FJ_VOLTA_MP_Easy15_45min_1891_DDA_200ng_1_241018150029.raw	F13	2.4	1
FALSE	High	Sequest HT (A2)	Unambiguous	[K].EGVLYVGSK.[T]		1	SYUA_HUMAN_P37840	SYUA_HUMAN_P37840	0	2	0.6192	0	1	1	476.262	951.516	951.515	1.99	0.00095	1.22955e+06	HCD (High Energy Collision Dissociation)	MS2	2.35639	60	12.1301	3084	20241018_FJ_VOLTA_MP_Easy15_45min_1891_DDA_200ng_6.raw	F8	2.39	1
FALSE	High	Sequest HT (A2)	Unambiguous	[K].TVEGAGSIAAATGFVK.[K]		1	SYUA_HUMAN_P37840	SYUA_HUMAN_P37840	0	2	0.6485	0	1	1	739.897	1478.79	1478.78	1.17	0.00087	584574	HCD (High Energy Collision Dissociation)	MS2	39.8428	60	29.1529	11978	20241018_FJ_VOLTA_MP_Easy15_45min_1891_DDA_200ng_11.raw	F3	2.39	1
FALSE	High	Sequest HT (A2)	Unambiguous	[K].TKEGVLYVGSK.[T]		1	SYUA_HUMAN_P37840	SYUA_HUMAN_P37840	1	2	0.6778	0	1	1	590.834	1180.66	1180.66	3.57	0.00211	891874	HCD (High Energy Collision Dissociation)	MS2	44.9564	60	9.1663	2686	20241018_FJ_VOLTA_MP_Easy15_45min_1891_DDA_200ng_11.raw	F3	2.39	1
FALSE	High	Sequest HT (A2)	Unambiguous	[K].EGVVAAAEKTK.[Q]		1	SYUA_HUMAN_P37840	SYUA_HUMAN_P37840	1	2	0.4244	0	1	1	551.81	1102.61	1102.61	1.89	0.00104	1.54509e+06	HCD (High Energy Collision Dissociation)	MS2	33.7016	60	6.2247	1326	20241018_FJ_VOLTA_MP_Easy15_45min_1891_DDA_200ng_11.raw	F3	2.38	1
FALSE	High	Sequest HT (A2)	Unambiguous	[K].EQVTNVGGAVVTGVTAVAQK.[T]		1	SYUA_HUMAN_P37840	SYUA_HUMAN_P37840	0	2	0.7815	0	1	1	964.528	1928.05	1928.04	2.21	0.00213	346973	HCD (High Energy Collision Dissociation)	MS2	4.31087	60	23.3506	8444	20241018_FJ_VOLTA_MP_Easy15_45min_1891_DDA_200ng_9.raw	F5	2.38	1
FALSE	High	Sequest HT (A2)	Unambiguous	[K].EGVLYVGSK.[T]		1	SYUA_HUMAN_P37840	SYUA_HUMAN_P37840	0	2	0.6345	0	1	1	476.261	951.514	951.515	-0.13	-6e-05	795452	HCD (High Energy Collision Dissociation)	MS2	0	60	11.5645	3413	20241018_FJ_VOLTA_MP_Easy15_45min_1891_DDA_200ng_8.raw	F6	2.38	1
FALSE	High	Sequest HT (A2)	Unambiguous	[R].ALDAIIASVTESLK.[E]		1	P0ACF6	P0ACF6	0	2	0.5924	0	1	1	715.91	1430.81	1430.81	1.98	0.00141	82299.5	HCD (High Energy Collision Dissociation)	MS2	28.6653	60	32.599	13100	20241018_FJ_VOLTA_MP_Easy15_45min_1891_DDA_200ng_7.raw	F7	2.38	1
FALSE	High	Sequest HT (A2)	Unambiguous	[K].EQVTNVGGAvVTGVTAVAQK.[T]	V10(Oxidation)	1	SYUA_HUMAN_P37840	SYUA_HUMAN_P37840	0	3	0.021	0	1	1	648.683	1944.03	1944.04	-2.61	-0.00169	293139	HCD (High Energy Collision Dissociation)	MS2	26.3091	60	17.2505	5871	20241018_FJ_VOLTA_MP_Easy15_45min_1891_DDA_200ng_9.raw	F5	2.38	1
FALSE	High	Sequest HT (A2)	Unambiguous	[R].ILEnGEVKPLDVK.[V]	N4(Deamidated)	1	B1XDP6	B1XDP6	0	3	0.5865	0	1	1	485.61	1454.81	1454.81	2.77	0.00134	526138	HCD (High Energy Collision Dissociation)	MS2	1.83994	60	13.9442	3895	20241018_FJ_VOLTA_MP_Easy15_45min_1891_DDA_200ng_4.raw	F10	2.37	1
FALSE	High	Sequest HT (A2)	Unambiguous	[K].EGVVHGVATVAEK.[T]		1	SYUA_HUMAN_P37840	SYUA_HUMAN_P37840	0	3	0.4979	0	1	1	432.571	1295.7	1295.7	1.33	0.00058	587613	HCD (High Energy Collision Dissociation)	MS2	22.8478	60	8.2301	1830	20241018_FJ_VOLTA_MP_Easy15_45min_1891_DDA_200ng_13.raw	F1	2.37	1
FALSE	High	Sequest HT (A2)	Unambiguous	[K].EGVvHGvATVAEK.[T]	V4(Oxidation); V7(Oxidation)	1	SYUA_HUMAN_P37840	SYUA_HUMAN_P37840	0	2	0.0591	0	1	1	664.348	1327.69	1327.69	2.67	0.00177	1.97463e+06	HCD (High Energy Collision Dissociation)	MS2	3.56555	60	12.0496	3591	20241018_FJ_VOLTA_MP_Easy15_45min_1891_DDA_200ng_9.raw	F5	2.37	1
FALSE	High	Sequest HT (A2)	Unambiguous	[-].mNIRPLHDR.[V]	M1(Oxidation)	1	B1XDP6	B1XDP6	0	3	0.1144	0	1	1	389.873	1167.61	1167.61	0.08	3e-05	2.70213e+06	HCD (High Energy Collision Dissociation)	MS2	18.0242	60	6.1564	1288	20241018_FJ_VOLTA_MP_Easy15_45min_1891_DDA_200ng_11.raw	F3	2.36	1
FALSE	High	Sequest HT (A2)	Unambiguous	[K].TVEGAGSIAAATGFVK.[K]		1	SYUA_HUMAN_P37840	SYUA_HUMAN_P37840	0	2	0.6822	0	1	1	739.898	1478.79	1478.78	2.82	0.00209	988502	HCD (High Energy Collision Dissociation)	MS2	38.6795	60	23.8571	9296	20241018_FJ_VOLTA_MP_Easy15_45min_1891_DDA_200ng_11.raw	F3	2.36	1
FALSE	High	Sequest HT (A2)	Unambiguous	[K].TKEGVvHGVATVAEK.[T]	V6(Oxidation)	1	SYUA_HUMAN_P37840	SYUA_HUMAN_P37840	1	3	0.089	0	1	1	514.283	1540.83	1540.83	0.06	3e-05	465039	HCD (High Energy Collision Dissociation)	MS2	45.4454	60	6.3143	1297	20241018_FJ_VOLTA_MP_Easy15_45min_1891_DDA_200ng_7.raw	F7	2.36	1
FALSE	High	Sequest HT (A2)	Unambiguous	[K].TVEGAGSIAAATGFVK.[K]		1	SYUA_HUMAN_P37840	SYUA_HUMAN_P37840	0	2	0.6737	0	1	1	739.897	1478.79	1478.78	0.84	0.00062	526011	HCD (High Energy Collision Dissociation)	MS2	5.40001	60	21.9407	6313	20241018_FJ_VOLTA_MP_Easy15_45min_1891_DDA_200ng_2.raw	F12	2.36	1
FALSE	High	Sequest HT (A2)	Unambiguous	[K].EqVTNVGGAVVTGVTAVAqK.[T]	Q2(Deamidated); Q19(Deamidated)	1	SYUA_HUMAN_P37840	SYUA_HUMAN_P37840	0	3	0.6653	0	1	1	644.01	1930.01	1930.01	0.65	0.00042	243590	HCD (High Energy Collision Dissociation)	MS2	5.64828	60	26.237	8061	20241018_FJ_VOLTA_MP_Easy15_45min_1891_DDA_200ng_4.raw	F10	2.36	1
FALSE	High	Sequest HT (A2)	Unambiguous	[K].EGVLYVGSK.[T]		1	SYUA_HUMAN_P37840	SYUA_HUMAN_P37840	0	2	0.5872	0	1	1	476.265	951.522	951.515	7.7	0.00366	184023664	HCD (High Energy Collision Dissociation)	MS2	1.78012	15.767	11.8472	2959	20241018_FJ_VOLTA_MP_Easy15_45min_1891_DDA_200ng_2.raw	F12	2.35	1
FALSE	High	Sequest HT (A2)	Unambiguous	[R].GEVLAVGnGR.[I]	N8(Deamidated)	1	B1XDP6	B1XDP6	0	2	0.1191	0	1	1	486.76	972.512	972.511	0.91	0.00044	414039	HCD (High Energy Collision Dissociation)	MS2	46.2044	60	10.3499	2634	20241018_FJ_VOLTA_MP_Easy15_45min_1891_DDA_200ng_4.raw	F10	2.35	1
FALSE	High	Sequest HT (A2)	Unambiguous	[K].EQVTNVGGAVVTGVTAVAQK.[T]		1	SYUA_HUMAN_P37840	SYUA_HUMAN_P37840	0	3	0.641	0	1	1	643.356	1928.05	1928.04	3.79	0.00244	60790.3	HCD (High Energy Collision Dissociation)	MS2	6.29601	60	27.2119	10966	20241018_FJ_VOLTA_MP_Easy15_45min_1891_DDA_200ng_11.raw	F3	2.34	1
FALSE	High	Sequest HT (A2)	Unambiguous	[K].EQVTNVGGAVVTGVTAVAQK.[T]		1	SYUA_HUMAN_P37840	SYUA_HUMAN_P37840	0	3	0.7179	0	1	1	643.354	1928.05	1928.04	1.6	0.00103	216081	HCD (High Energy Collision Dissociation)	MS2	44.1294	60	23.0614	6866	20241018_FJ_VOLTA_MP_Easy15_45min_1891_DDA_200ng_4.raw	F10	2.34	1
FALSE	High	Sequest HT (A2)	Unambiguous	[K].TKEGVLYVGSK.[T]		1	SYUA_HUMAN_P37840	SYUA_HUMAN_P37840	1	3	0.5236	0	1	1	394.224	1180.66	1180.66	1.28	0.0005	488780	HCD (High Energy Collision Dissociation)	MS2	4.59412	60	8.327	2129	20241018_FJ_VOLTA_MP_Easy15_45min_1891_DDA_200ng_8.raw	F6	2.33	1
FALSE	High	Sequest HT (A2)	Unambiguous	[K].EGVLYVGSK.[T]		1	SYUA_HUMAN_P37840	SYUA_HUMAN_P37840	0	2	0.5751	0	1	1	476.261	951.515	951.515	0.26	0.00012	5.04063e+06	HCD (High Energy Collision Dissociation)	MS2	18.9122	60	11.5184	3693	20241018_FJ_VOLTA_MP_Easy15_45min_1891_DDA_200ng_12.raw	F2	2.33	1
FALSE	High	Sequest HT (A2)	Unambiguous	[K].EGVVAAAEK.[T]		1	SYUA_HUMAN_P37840	SYUA_HUMAN_P37840	0	2	0.5408	0	1	1	437.239	873.471	873.468	4.42	0.00193	725752	HCD (High Energy Collision Dissociation)	MS2	5.11653	60	8.8819	2548	20241018_FJ_VOLTA_MP_Easy15_45min_1891_DDA_200ng_11.raw	F3	2.33	1
FALSE	High	Sequest HT (A2)	Unambiguous	[K].EQVTnVGGAVVTGVTAVAQK.[T]	N5(Oxidation)	1	SYUA_HUMAN_P37840	SYUA_HUMAN_P37840	0	3		0.021	2	2	648.683	1944.03	1944.04	-2.61	-0.00169	293139	HCD (High Energy Collision Dissociation)	MS2	26.3091	60	17.2505	5871	20241018_FJ_VOLTA_MP_Easy15_45min_1891_DDA_200ng_9.raw	F5	2.33	1
FALSE	High	Sequest HT (A2)	Unambiguous	[K].EQVTNvGGAVVTGVTAVAQK.[T]	V6(Oxidation)	1	SYUA_HUMAN_P37840	SYUA_HUMAN_P37840	0	3		0.021	2	3	648.683	1944.03	1944.04	-2.61	-0.00169	293139	HCD (High Energy Collision Dissociation)	MS2	26.3091	60	17.2505	5871	20241018_FJ_VOLTA_MP_Easy15_45min_1891_DDA_200ng_9.raw	F5	2.33	1
FALSE	High	Sequest HT (A2)	Unambiguous	[K].EGVLYVGSK.[T]		1	SYUA_HUMAN_P37840	SYUA_HUMAN_P37840	0	2	0.5776	0	1	1	476.262	951.518	951.515	3.08	0.00147	544304	HCD (High Energy Collision Dissociation)	MS2	18.5707	60	12.5843	3864	20241018_FJ_VOLTA_MP_Easy15_45min_1891_DDA_200ng_8.raw	F6	2.32	1
FALSE	High	Sequest HT (A2)	Unambiguous	[K].TVEGAGSIAAATGFVK.[K]		1	SYUA_HUMAN_P37840	SYUA_HUMAN_P37840	0	3	0.569	0	1	1	493.6	1478.79	1478.78	1.23	0.0006	302187	HCD (High Energy Collision Dissociation)	MS2	4.96098	60	21.3562	5367	20241018_FJ_VOLTA_MP_Easy15_45min_1891_DDA_200ng_13.raw	F1	2.32	1
FALSE	High	Sequest HT (A2)	Unambiguous	[K].TKEGVLYVGSK.[T]		1	SYUA_HUMAN_P37840	SYUA_HUMAN_P37840	1	2	0.7284	0	1	1	590.833	1180.66	1180.66	1.08	0.00064	808265	HCD (High Energy Collision Dissociation)	MS2	0.820399	60	8.1076	1813	20241018_FJ_VOLTA_MP_Easy15_45min_1891_DDA_200ng_6.raw	F8	2.32	1
FALSE	High	Sequest HT (A2)	Unambiguous	[K].EGVLYVGSK.[T]		1	SYUA_HUMAN_P37840	SYUA_HUMAN_P37840	0	2	0.5948	0	1	1	476.262	951.518	951.515	3.08	0.00147	638473	HCD (High Energy Collision Dissociation)	MS2	12.2138	60	13.5165	4243	20241018_FJ_VOLTA_MP_Easy15_45min_1891_DDA_200ng_9.raw	F5	2.32	1
FALSE	High	Sequest HT (A2)	Unambiguous	[K].TKEGVVHGVATVAEK.[T]		1	SYUA_HUMAN_P37840	SYUA_HUMAN_P37840	1	3	0.645	0	1	1	508.951	1524.84	1524.84	0.85	0.00043	303282	HCD (High Energy Collision Dissociation)	MS2	5.05192	60	6.3028	1159	20241018_FJ_VOLTA_MP_Easy15_45min_1891_DDA_200ng_6.raw	F8	2.31	1
FALSE	High	Sequest HT (A2)	Unambiguous	[K].EGVLYVGSKTK.[E]		1	SYUA_HUMAN_P37840	SYUA_HUMAN_P37840	1	3	0.671	0	1	1	394.223	1180.66	1180.66	-1.28	-0.0005	1.36043e+06	HCD (High Energy Collision Dissociation)	MS2	78.6036	60	7.5781	1995	20241018_FJ_VOLTA_MP_Easy15_45min_1891_DDA_200ng_11.raw	F3	2.31	1
FALSE	High	Sequest HT (A2)	Unambiguous	[K].YDAVIALGTVIR.[G]		2	B1LJG5	B1LJG5; B7MD73	0	2	0.6565	0	1	1	645.876	1290.75	1290.74	2.75	0.00178	401526	HCD (High Energy Collision Dissociation)	MS2	5.98121	60	27.9451	10722	20241018_FJ_VOLTA_MP_Easy15_45min_1891_DDA_200ng_7.raw	F7	2.3	1
FALSE	High	Sequest HT (A2)	Unambiguous	[K].EGVLYVGSK.[T]		1	SYUA_HUMAN_P37840	SYUA_HUMAN_P37840	0	2	0.6087	0	1	1	476.264	951.521	951.515	6.48	0.00308	323449	HCD (High Energy Collision Dissociation)	MS2	26.9685	60	12.534	4159	20241018_FJ_VOLTA_MP_Easy15_45min_1891_DDA_200ng_12.raw	F2	2.3	1
FALSE	High	Sequest HT (A2)	Unambiguous	[K].EGVVHGVATVAEK.[T]		1	SYUA_HUMAN_P37840	SYUA_HUMAN_P37840	0	2	0.2271	0	1	1	648.354	1295.7	1295.7	3.74	0.00243	423106	HCD (High Energy Collision Dissociation)	MS2	0	60	9.8092	2970	20241018_FJ_VOLTA_MP_Easy15_45min_1891_DDA_200ng_11.raw	F3	2.29	1
FALSE	High	Sequest HT (A2)	Unambiguous	[K].TVEGAGSIAAATGFVK.[K]		1	SYUA_HUMAN_P37840	SYUA_HUMAN_P37840	0	2	0.607	0	1	1	739.903	1478.8	1478.78	9.76	0.00721	456902	HCD (High Energy Collision Dissociation)	MS2	47.8845	60	20.572	7281	20241018_FJ_VOLTA_MP_Easy15_45min_1891_DDA_200ng_7.raw	F7	2.29	1
FALSE	High	Sequest HT (A2)	Unambiguous	[K].EGvvHGVATVAEK.[T]	V3(Oxidation); V4(Oxidation)	1	SYUA_HUMAN_P37840	SYUA_HUMAN_P37840	0	2	0.0789	0	1	1	664.348	1327.69	1327.69	2.12	0.00141	3.8441e+06	HCD (High Energy Collision Dissociation)	MS2	2.55421	60	10.3433	3203	20241018_FJ_VOLTA_MP_Easy15_45min_1891_DDA_200ng_11.raw	F3	2.28	1
FALSE	High	Sequest HT (A2)	Unambiguous	[R].GEVLAVGnGR.[I]	N8(Deamidated)	1	B1XDP6	B1XDP6	0	2	0.136	0	1	1	486.76	972.512	972.511	1.16	0.00056	349301	HCD (High Energy Collision Dissociation)	MS2	0	60	11.0935	2948	20241018_FJ_VOLTA_MP_Easy15_45min_1891_DDA_200ng_3.raw	F11	2.28	1
FALSE	High	Sequest HT (A2)	Unambiguous	[K].TVEGAGSIAAATGFVK.[K]		1	SYUA_HUMAN_P37840	SYUA_HUMAN_P37840	0	2	0.6784	0	1	1	739.898	1478.79	1478.78	2.49	0.00184	320703	HCD (High Energy Collision Dissociation)	MS2	21.7784	60	22.5713	8718	20241018_FJ_VOLTA_MP_Easy15_45min_1891_DDA_200ng_12.raw	F2	2.27	1
FALSE	High	Sequest HT (A2)	Unambiguous	[K].TVEGAGSIAAATGFVK.[K]		1	SYUA_HUMAN_P37840	SYUA_HUMAN_P37840	0	2	0.5286	0	1	1	739.897	1478.79	1478.78	0.68	0.0005	358267	HCD (High Energy Collision Dissociation)	MS2	3.24817	60	18.0747	6261	20241018_FJ_VOLTA_MP_Easy15_45min_1891_DDA_200ng_7.raw	F7	2.27	1
FALSE	High	Sequest HT (A2)	Unambiguous	[K].ALEEAGAEVEVK.[-]		2	C5A0S6	C5A0S6; B7MRB2	0	2	0.5088	0	1	1	622.823	1244.64	1244.64	1.97	0.00123	517498	HCD (High Energy Collision Dissociation)	MS2	0	60	11.3909	3644	20241018_FJ_VOLTA_MP_Easy15_45min_1891_DDA_200ng_11.raw	F3	2.26	1
FALSE	High	Sequest HT (A2)	Unambiguous	[K].VGDTVIEFDLPLLEEK.[A]		1	P69783	P69783	0	2	0.7345	0	1	1	908.986	1816.96	1816.96	3.59	0.00327	97826.9	HCD (High Energy Collision Dissociation)	MS2	37.6093	60	32.5034	13668	20241018_FJ_VOLTA_MP_Easy15_45min_1891_DDA_200ng_11.raw	F3	2.26	1
FALSE	High	Sequest HT (A2)	Unambiguous	[K].TVEGAGSIAAATGFVK.[K]		1	SYUA_HUMAN_P37840	SYUA_HUMAN_P37840	0	2	0.6726	0	1	1	739.897	1478.79	1478.78	1.42	0.00105	257491	HCD (High Energy Collision Dissociation)	MS2	9.47146	60	35.9099	15149	20241018_FJ_VOLTA_MP_Easy15_45min_1891_DDA_200ng_11.raw	F3	2.26	1
FALSE	High	Sequest HT (A2)	Unambiguous	[R].GEVLAVGnGR.[I]	N8(Deamidated)	1	B1XDP6	B1XDP6	0	2	0.1239	0	1	1	486.761	972.514	972.511	2.98	0.00145	567705	HCD (High Energy Collision Dissociation)	MS2	44.462	60	10.2257	3153	20241018_FJ_VOLTA_MP_Easy15_45min_1891_DDA_200ng_11.raw	F3	2.26	1
FALSE	High	Sequest HT (A2)	Unambiguous	[K].EGVLYVGSK.[T]		1	SYUA_HUMAN_P37840	SYUA_HUMAN_P37840	0	2	0.5575	0	1	1	476.262	951.518	951.515	3.08	0.00147	780720	HCD (High Energy Collision Dissociation)	MS2	9.11869	60	12.5783	3958	20241018_FJ_VOLTA_MP_Easy15_45min_1891_DDA_200ng_7.raw	F7	2.26	1
FALSE	High	Sequest HT (A2)	Unambiguous	[-].mDVFmK.[G]	M1(Oxidation); M5(Oxidation)	1	SYUA_HUMAN_P37840	SYUA_HUMAN_P37840	0	2	0.12	0	1	1	401.678	802.348	802.347	1.25	0.0005	2910342	HCD (High Energy Collision Dissociation)	MS2	1.86663	60	7.5095	1775	20241018_FJ_VOLTA_MP_Easy15_45min_1891_DDA_200ng_8.raw	F6	2.25	1
FALSE	High	Sequest HT (A2)	Unambiguous	[K].TVEGAGSIAAATGFVk.[K]	K16(Oxidation)	1	SYUA_HUMAN_P37840	SYUA_HUMAN_P37840	0	2	0.2222	0	1	1	747.894	1494.78	1494.78	1.13	0.00085	211398	HCD (High Energy Collision Dissociation)	MS2	5.01803	60	18.4002	5156	20241018_FJ_VOLTA_MP_Easy15_45min_1891_DDA_200ng_2.raw	F12	2.25	1
FALSE	High	Sequest HT (A2)	Unambiguous	[K].TVEGAGSIAAAtGFVK.[K]	T12(Oxidation)	1	SYUA_HUMAN_P37840	SYUA_HUMAN_P37840	0	2	0.2222	0	1	3	747.894	1494.78	1494.78	1.13	0.00085	211398	HCD (High Energy Collision Dissociation)	MS2	5.01803	60	18.4002	5156	20241018_FJ_VOLTA_MP_Easy15_45min_1891_DDA_200ng_2.raw	F12	2.25	1
FALSE	High	Sequest HT (A2)	Unambiguous	[K].TVEGAGSIAAATGFvK.[K]	V15(Oxidation)	1	SYUA_HUMAN_P37840	SYUA_HUMAN_P37840	0	2	0.2222	0	1	4	747.894	1494.78	1494.78	1.13	0.00085	211398	HCD (High Energy Collision Dissociation)	MS2	5.01803	60	18.4002	5156	20241018_FJ_VOLTA_MP_Easy15_45min_1891_DDA_200ng_2.raw	F12	2.25	1
FALSE	High	Sequest HT (A2)	Unambiguous	[K].TVEGAGSIAAATGfVK.[K]	F14(Oxidation)	1	SYUA_HUMAN_P37840	SYUA_HUMAN_P37840	0	2	0.2222	0	1	2	747.894	1494.78	1494.78	1.13	0.00085	211398	HCD (High Energy Collision Dissociation)	MS2	5.01803	60	18.4002	5156	20241018_FJ_VOLTA_MP_Easy15_45min_1891_DDA_200ng_2.raw	F12	2.25	1
FALSE	High	Sequest HT (A2)	Unambiguous	[K].TKEGVLYVGSK.[T]		1	SYUA_HUMAN_P37840	SYUA_HUMAN_P37840	1	2	0.6667	0	1	1	590.833	1180.66	1180.66	1.81	0.00107	1929234	HCD (High Energy Collision Dissociation)	MS2	42.9441	60	8.6583	2448	20241018_FJ_VOLTA_MP_Easy15_45min_1891_DDA_200ng_11.raw	F3	2.25	1
FALSE	High	Sequest HT (A2)	Unambiguous	[-].mDVFmK.[G]	M1(Oxidation); M5(Oxidation)	1	SYUA_HUMAN_P37840	SYUA_HUMAN_P37840	0	2	0.1333	0	1	1	401.679	802.35	802.347	3	0.0012	6000791	HCD (High Energy Collision Dissociation)	MS2	6.5155	60	7.3659	1905	20241018_FJ_VOLTA_MP_Easy15_45min_1891_DDA_200ng_11.raw	F3	2.25	1
FALSE	High	Sequest HT (A2)	Unambiguous	[K].EGvvHGVATVAEK.[T]	V3(Oxidation); V4(Oxidation)	1	SYUA_HUMAN_P37840	SYUA_HUMAN_P37840	0	2	0.0541	0	1	1	664.348	1327.69	1327.69	2.12	0.00141	558927	HCD (High Energy Collision Dissociation)	MS2	25.5372	60	23.3347	5056	20241018_FJ_VOLTA_MP_Easy15_45min_1891_DDA_200ng_1_241018150029.raw	F13	2.22	1
FALSE	High	Sequest HT (A2)	Unambiguous	[K].TKEGVVHGVATVAEK.[T]		1	SYUA_HUMAN_P37840	SYUA_HUMAN_P37840	1	2	0.7387	0	1	1	762.923	1524.84	1524.84	0.02	1e-05	431450	HCD (High Energy Collision Dissociation)	MS2	27.9681	60	6.4542	1279	20241018_FJ_VOLTA_MP_Easy15_45min_1891_DDA_200ng_8.raw	F6	2.22	1
FALSE	High	Sequest HT (A2)	Unambiguous	[K].EGVVAAAEK.[T]		1	SYUA_HUMAN_P37840	SYUA_HUMAN_P37840	0	2	0.5405	0	1	1	437.239	873.47	873.468	2.67	0.00117	505303	HCD (High Energy Collision Dissociation)	MS2	41.9789	60	9.3895	2788	20241018_FJ_VOLTA_MP_Easy15_45min_1891_DDA_200ng_11.raw	F3	2.22	1
FALSE	High	Sequest HT (A2)	Unambiguous	[K].LNIGEDVEEmLR.[S]	M10(Oxidation)	1	P0ABD4	P0ABD4	0	2	0.0226	0	1	3	717.355	1433.7	1433.69	6.35	0.00455	297628	HCD (High Energy Collision Dissociation)	MS2	25.961	60	23.1999	8970	20241018_FJ_VOLTA_MP_Easy15_45min_1891_DDA_200ng_11.raw	F3	2.21	1
FALSE	High	Sequest HT (A2)	Unambiguous	[K].LNIGEDVEEMlR.[S]	L11(Oxidation)	1	P0ABD4	P0ABD4	0	2	0.0226	0	1	2	717.355	1433.7	1433.69	6.35	0.00455	297628	HCD (High Energy Collision Dissociation)	MS2	25.961	60	23.1999	8970	20241018_FJ_VOLTA_MP_Easy15_45min_1891_DDA_200ng_11.raw	F3	2.21	1
FALSE	High	Sequest HT (A2)	Unambiguous	[K].LNIGEDVEeMLR.[S]	E9(Oxidation)	1	P0ABD4	P0ABD4	0	2	0.0226	0	1	1	717.355	1433.7	1433.69	6.35	0.00455	297628	HCD (High Energy Collision Dissociation)	MS2	25.961	60	23.1999	8970	20241018_FJ_VOLTA_MP_Easy15_45min_1891_DDA_200ng_11.raw	F3	2.21	1
FALSE	High	Sequest HT (A2)	Unambiguous	[-].mDVFmK.[G]	M1(Oxidation); M5(Oxidation)	1	SYUA_HUMAN_P37840	SYUA_HUMAN_P37840	0	2	0.1403	0	1	1	401.676	802.346	802.347	-2.25	-0.0009	20376170	HCD (High Energy Collision Dissociation)	MS2	3.49053	60	7.8801	2121	20241018_FJ_VOLTA_MP_Easy15_45min_1891_DDA_200ng_11.raw	F3	2.21	1
FALSE	High	Sequest HT (A2)	Unambiguous	[K].EGVLYVGSK.[T]		1	SYUA_HUMAN_P37840	SYUA_HUMAN_P37840	0	2	0.5656	0	1	1	476.262	951.517	951.515	2.12	0.00101	1.3378e+06	HCD (High Energy Collision Dissociation)	MS2	0.65019	60	11.9234	2873	20241018_FJ_VOLTA_MP_Easy15_45min_1891_DDA_200ng_13.raw	F1	2.21	1
FALSE	High	Sequest HT (A2)	Unambiguous	[K].EGvvHGVATVAEK.[T]	V3(Oxidation); V4(Oxidation)	1	SYUA_HUMAN_P37840	SYUA_HUMAN_P37840	0	2	0.0227	0	1	1	664.348	1327.69	1327.69	3.13	0.00208	3.58726e+06	HCD (High Energy Collision Dissociation)	MS2	0.799861	60	12.838	4285	20241018_FJ_VOLTA_MP_Easy15_45min_1891_DDA_200ng_11.raw	F3	2.2	1
FALSE	High	Sequest HT (A2)	Unambiguous	[K].IDNEEVLImSESDILAIVEA.[-]	M9(Oxidation)	1	B1XDP6	B1XDP6	0	2	0.0959	0	1	1	1110.05	2219.1	2219.1	-0.23	-0.00025	517467	HCD (High Energy Collision Dissociation)	MS2	6.27664	60	37.1794	12935	20241018_FJ_VOLTA_MP_Easy15_45min_1891_DDA_200ng_3.raw	F11	2.19	1
FALSE	High	Sequest HT (A2)	Unambiguous	[K].EGVVHGVATVAEK.[T]		1	SYUA_HUMAN_P37840	SYUA_HUMAN_P37840	0	2	0.2785	0	1	1	648.353	1295.7	1295.7	2.14	0.00139	385966	HCD (High Energy Collision Dissociation)	MS2	0	60	8.2927	1935	20241018_FJ_VOLTA_MP_Easy15_45min_1891_DDA_200ng_3.raw	F11	2.19	1
FALSE	High	Sequest HT (A2)	Unambiguous	[-].mDVFmK.[G]	M1(Oxidation); M5(Oxidation)	1	SYUA_HUMAN_P37840	SYUA_HUMAN_P37840	0	2	0.1239	0	1	1	401.678	802.348	802.347	1.25	0.0005	2930167	HCD (High Energy Collision Dissociation)	MS2	4.12479	60	7.5791	1705	20241018_FJ_VOLTA_MP_Easy15_45min_1891_DDA_200ng_3.raw	F11	2.18	1
FALSE	High	Sequest HT (A2)	Unambiguous	[K].EGVVAAAEK.[T]		1	SYUA_HUMAN_P37840	SYUA_HUMAN_P37840	0	2	0.6193	0	1	1	437.238	873.47	873.468	2.18	0.00095	273153	HCD (High Energy Collision Dissociation)	MS2	18.9049	60	8.2365	1816	20241018_FJ_VOLTA_MP_Easy15_45min_1891_DDA_200ng_2.raw	F12	2.18	1
FALSE	High	Sequest HT (A2)	Unambiguous	[-].mNIIEANVATPDAR.[V]	M1(Oxidation)	2	B1LJG5	B1LJG5; B7MD73	0	2	0.0046	0	1	1	765.88	1530.75	1530.76	-3.56	-0.00273	328789	HCD (High Energy Collision Dissociation)	MS2	34.7484	60	14.8486	5218	20241018_FJ_VOLTA_MP_Easy15_45min_1891_DDA_200ng_11.raw	F3	2.18	1
FALSE	High	Sequest HT (A2)	Unambiguous	[K].SAGGIVLTGSAAAK.[S]		1	B1XDP6	B1XDP6	0	2	0.6083	0	1	1	601.84	1202.67	1202.67	-0.55	-0.00033	392541	HCD (High Energy Collision Dissociation)	MS2	25.0211	60	11.1261	3555	20241018_FJ_VOLTA_MP_Easy15_45min_1891_DDA_200ng_12.raw	F2	2.17	1
FALSE	High	Sequest HT (A2)	Unambiguous	[-].mDVFmK.[G]	M1(Oxidation); M5(Oxidation)	1	SYUA_HUMAN_P37840	SYUA_HUMAN_P37840	0	2	0.1244	0	1	1	401.677	802.346	802.347	-1.87	-0.00075	4242011	HCD (High Energy Collision Dissociation)	MS2	3.38189	60	7.9613	1948	20241018_FJ_VOLTA_MP_Easy15_45min_1891_DDA_200ng_9.raw	F5	2.17	1
FALSE	High	Sequest HT (A2)	Unambiguous	[-].MnIIEANVATPDAR.[V]	N2(Oxidation)	2	B1LJG5	B1LJG5; B7MD73	0	2		0.0046	2	2	765.88	1530.75	1530.76	-3.56	-0.00273	328789	HCD (High Energy Collision Dissociation)	MS2	34.7484	60	14.8486	5218	20241018_FJ_VOLTA_MP_Easy15_45min_1891_DDA_200ng_11.raw	F3	2.17	1
FALSE	High	Sequest HT (A2)	Unambiguous	[K].EGVLYVGSK.[T]		1	SYUA_HUMAN_P37840	SYUA_HUMAN_P37840	0	2	0.5714	0	1	1	476.262	951.517	951.515	2.44	0.00116	1.06076e+06	HCD (High Energy Collision Dissociation)	MS2	6.36351	60	12.2028	3309	20241018_FJ_VOLTA_MP_Easy15_45min_1891_DDA_200ng_3.raw	F11	2.17	1
FALSE	High	Sequest HT (A2)	Unambiguous	[K].LNIGEDVEEMLr.[S]	R12(Oxidation)	1	P0ABD4	P0ABD4	0	2		0.0226	4	4	717.355	1433.7	1433.69	6.35	0.00455	297628	HCD (High Energy Collision Dissociation)	MS2	25.961	60	23.1999	8970	20241018_FJ_VOLTA_MP_Easy15_45min_1891_DDA_200ng_11.raw	F3	2.16	1
FALSE	High	Sequest HT (A2)	Unambiguous	[K].EGVVAAAEK.[T]		1	SYUA_HUMAN_P37840	SYUA_HUMAN_P37840	0	2	0.5741	0	1	1	437.239	873.47	873.468	2.67	0.00117	236809	HCD (High Energy Collision Dissociation)	MS2	25.9543	60	6.9835	1448	20241018_FJ_VOLTA_MP_Easy15_45min_1891_DDA_200ng_6.raw	F8	2.16	1
FALSE	High	Sequest HT (A2)	Unambiguous	[-].mDVFmK.[G]	M1(Oxidation); M5(Oxidation)	1	SYUA_HUMAN_P37840	SYUA_HUMAN_P37840	0	2	0.1349	0	1	1	401.678	802.349	802.347	2.62	0.00105	4.77977e+06	HCD (High Energy Collision Dissociation)	MS2	3.31675	60	7.3995	1914	20241018_FJ_VOLTA_MP_Easy15_45min_1891_DDA_200ng_12.raw	F2	2.15	1
FALSE	High	Sequest HT (A2)	Unambiguous	[K].EGvvHGVATVAEK.[T]	V3(Oxidation); V4(Oxidation)	1	SYUA_HUMAN_P37840	SYUA_HUMAN_P37840	0	2	0.107	0	1	1	664.346	1327.69	1327.69	0.37	0.00025	1.92186e+06	HCD (High Energy Collision Dissociation)	MS2	0	60	10.8479	3419	20241018_FJ_VOLTA_MP_Easy15_45min_1891_DDA_200ng_11.raw	F3	2.15	1
FALSE	High	Sequest HT (A2)	Unambiguous	[K].EGVVAAAEK.[T]		1	SYUA_HUMAN_P37840	SYUA_HUMAN_P37840	0	2	0.4465	0	1	1	437.239	873.47	873.468	3.23	0.00141	300102	HCD (High Energy Collision Dissociation)	MS2	43.7962	60	8.438	2237	20241018_FJ_VOLTA_MP_Easy15_45min_1891_DDA_200ng_7.raw	F7	2.15	1
FALSE	High	Sequest HT (A2)	Unambiguous	[K].EGVlYVGSK.[T]	L4(Oxidation)	1	SYUA_HUMAN_P37840	SYUA_HUMAN_P37840	0	2	0.1256	0	1	1	484.257	967.506	967.509	-3.39	-0.00164	251255	HCD (High Energy Collision Dissociation)	MS2	12.8635	60	21.6848	4252	20241018_FJ_VOLTA_MP_Easy15_45min_1891_DDA_200ng_1_241018150029.raw	F13	2.15	1
FALSE	High	Sequest HT (A2)	Unambiguous	[K].ALEEAGAEVEVK.[-]		2	C5A0S6	C5A0S6; B7MRB2	0	2	0.493	0	1	1	622.822	1244.64	1244.64	0.4	0.00025	660974	HCD (High Energy Collision Dissociation)	MS2	34.5618	60	11.6137	3109	20241018_FJ_VOLTA_MP_Easy15_45min_1891_DDA_200ng_3.raw	F11	2.15	1
FALSE	High	Sequest HT (A2)	Unambiguous	[K].EGVvHGvATVAEK.[T]	V4(Oxidation); V7(Oxidation)	1	SYUA_HUMAN_P37840	SYUA_HUMAN_P37840	0	2		0.0227	2	2	664.348	1327.69	1327.69	3.13	0.00208	3.58726e+06	HCD (High Energy Collision Dissociation)	MS2	0.799861	60	12.838	4285	20241018_FJ_VOLTA_MP_Easy15_45min_1891_DDA_200ng_11.raw	F3	2.15	1
FALSE	High	Sequest HT (A2)	Unambiguous	[K].EQVTNVGGAVVTGVTAVAQK.[T]		1	SYUA_HUMAN_P37840	SYUA_HUMAN_P37840	0	2	0.7523	0	1	1	964.527	1928.05	1928.04	0.95	0.00091	298261	HCD (High Energy Collision Dissociation)	MS2	0	60	23.0534	8238	20241018_FJ_VOLTA_MP_Easy15_45min_1891_DDA_200ng_8.raw	F6	2.14	1
FALSE	High	Sequest HT (A2)	Unambiguous	[-].mDVFmK.[G]	M1(Oxidation); M5(Oxidation)	1	SYUA_HUMAN_P37840	SYUA_HUMAN_P37840	0	2	0.1262	0	1	1	401.678	802.349	802.347	1.63	0.00065	2.06585e+06	HCD (High Energy Collision Dissociation)	MS2	4.67652	60	7.4418	1592	20241018_FJ_VOLTA_MP_Easy15_45min_1891_DDA_200ng_13.raw	F1	2.14	1
FALSE	High	Sequest HT (A2)	Unambiguous	[-].mDVFmK.[G]	M1(Oxidation); M5(Oxidation)	1	SYUA_HUMAN_P37840	SYUA_HUMAN_P37840	0	2	0.1262	0	1	1	401.678	802.35	802.347	2.92	0.00117	4.41341e+06	HCD (High Energy Collision Dissociation)	MS2	2.85417	60	7.4014	1836	20241018_FJ_VOLTA_MP_Easy15_45min_1891_DDA_200ng_7.raw	F7	2.14	1
FALSE	High	Sequest HT (A2)	Unambiguous	[K].EGVLYVGSK.[T]		1	SYUA_HUMAN_P37840	SYUA_HUMAN_P37840	0	2	0.5654	0	1	1	476.263	951.519	951.515	4.49	0.00214	733791	HCD (High Energy Collision Dissociation)	MS2	19.1884	60	23.519	5153	20241018_FJ_VOLTA_MP_Easy15_45min_1891_DDA_200ng_1_241018150029.raw	F13	2.14	1
FALSE	High	Sequest HT (A2)	Unambiguous	[-].mDVFmK.[G]	M1(Oxidation); M5(Oxidation)	1	SYUA_HUMAN_P37840	SYUA_HUMAN_P37840	0	2	0.1449	0	1	1	401.678	802.348	802.347	0.72	0.00029	3.57006e+06	HCD (High Energy Collision Dissociation)	MS2	2.01429	60	7.4803	1633	20241018_FJ_VOLTA_MP_Easy15_45min_1891_DDA_200ng_6.raw	F8	2.14	1
FALSE	High	Sequest HT (A2)	Unambiguous	[K].DLVESAPAALK.[E]		2	C5A0S6	C5A0S6; B7MRB2	0	2	0.7277	0	1	1	557.312	1113.62	1113.62	1.99	0.00111	248161	HCD (High Energy Collision Dissociation)	MS2	30.0246	60	16.1573	5411	20241018_FJ_VOLTA_MP_Easy15_45min_1891_DDA_200ng_9.raw	F5	2.13	1
FALSE	High	Sequest HT (A2)	Unambiguous	[K].EGVLYVGSK.[T]		1	SYUA_HUMAN_P37840	SYUA_HUMAN_P37840	0	2	0.6338	0	1	1	476.262	951.516	951.515	1.6	0.00076	353669	HCD (High Energy Collision Dissociation)	MS2	26.6896	60	14.7778	4891	20241018_FJ_VOLTA_MP_Easy15_45min_1891_DDA_200ng_8.raw	F6	2.13	1
FALSE	High	Sequest HT (A2)	Unambiguous	[K].TVEGAGSIAAATGFVK.[K]		1	SYUA_HUMAN_P37840	SYUA_HUMAN_P37840	0	2	0.6667	0	1	1	739.899	1478.79	1478.78	3.4	0.00252	325058	HCD (High Energy Collision Dissociation)	MS2	3.62335	60	31.8337	13340	20241018_FJ_VOLTA_MP_Easy15_45min_1891_DDA_200ng_11.raw	F3	2.13	1
FALSE	High	Sequest HT (A2)	Unambiguous	[R].GATGLGLK.[E]		2	C5A0S6	C5A0S6; B7MRB2	0	2	0.3991	0	1	1	358.719	716.431	716.43	1.77	0.00063	1.01336e+06	HCD (High Energy Collision Dissociation)	MS2	31.3764	60	8.0526	2191	20241018_FJ_VOLTA_MP_Easy15_45min_1891_DDA_200ng_11.raw	F3	2.13	1
FALSE	High	Sequest HT (A2)	Unambiguous	[K].EGVLYVGSK.[T]		1	SYUA_HUMAN_P37840	SYUA_HUMAN_P37840	0	2	0.5708	0	1	1	476.262	951.516	951.515	1.67	0.00079	586354	HCD (High Energy Collision Dissociation)	MS2	4.95721	60	14.9825	4079	20241018_FJ_VOLTA_MP_Easy15_45min_1891_DDA_200ng_2.raw	F12	2.12	1
FALSE	High	Sequest HT (A2)	Unambiguous	[K].EGVVAAAEK.[T]		1	SYUA_HUMAN_P37840	SYUA_HUMAN_P37840	0	2	0.4528	0	1	1	437.239	873.471	873.468	3.58	0.00156	298380	HCD (High Energy Collision Dissociation)	MS2	49.3486	60	8.4141	2227	20241018_FJ_VOLTA_MP_Easy15_45min_1891_DDA_200ng_7.raw	F7	2.12	1
FALSE	High	Sequest HT (A2)	Unambiguous	[K].TVEGAGsIAAATGFVK.[K]	S7(Oxidation)	1	SYUA_HUMAN_P37840	SYUA_HUMAN_P37840	0	2	0.019	0	1	1	747.887	1494.77	1494.78	-8.26	-0.00617	462288	HCD (High Energy Collision Dissociation)	MS2	42.6391	60	20.9807	7888	20241018_FJ_VOLTA_MP_Easy15_45min_1891_DDA_200ng_11.raw	F3	2.11	1
FALSE	High	Sequest HT (A2)	Unambiguous	[K].EGVVAAAEK.[T]		1	SYUA_HUMAN_P37840	SYUA_HUMAN_P37840	0	2	0.6351	0	1	1	437.238	873.469	873.468	1.9	0.00083	330523	HCD (High Energy Collision Dissociation)	MS2	50.1104	60	8.6841	2231	20241018_FJ_VOLTA_MP_Easy15_45min_1891_DDA_200ng_9.raw	F5	2.11	1
FALSE	High	Sequest HT (A2)	Unambiguous	[-].mDVFmK.[G]	M1(Oxidation); M5(Oxidation)	1	SYUA_HUMAN_P37840	SYUA_HUMAN_P37840	0	2	0.109	0	1	1	401.678	802.349	802.347	1.78	0.00071	2.23009e+06	HCD (High Energy Collision Dissociation)	MS2	15.9884	60	7.4563	1728	20241018_FJ_VOLTA_MP_Easy15_45min_1891_DDA_200ng_9.raw	F5	2.11	1
FALSE	High	Sequest HT (A2)	Unambiguous	[R].ILFLEGLPNLQDLGK.[L]		1	P0ABD4	P0ABD4	0	2	0.5829	0	1	1	835.481	1669.95	1669.95	0.94	0.00079	299783	HCD (High Energy Collision Dissociation)	MS2	20.0621	60	33.2753	14141	20241018_FJ_VOLTA_MP_Easy15_45min_1891_DDA_200ng_12.raw	F2	2.11	1
FALSE	High	Sequest HT (A2)	Unambiguous	[K].YKDRLASAqK.[E]	Q9(Deamidated)	3	Q8FFH5	Q8FFH5; Q0TFD0; B1IXM6	2	2	0.419	0	1	1	590.82	1180.63	1180.63	1.3	0.00076	652994	HCD (High Energy Collision Dissociation)	MS2	17.1939	60	23.1791	4975	20241018_FJ_VOLTA_MP_Easy15_45min_1891_DDA_200ng_1_241018150029.raw	F13	2.1	1
FALSE	High	Sequest HT (A2)	Unambiguous	[K].TVEGAGSIAAATGFVK.[K]		1	SYUA_HUMAN_P37840	SYUA_HUMAN_P37840	0	2	0.6651	0	1	1	739.896	1478.79	1478.78	0.51	0.00038	37028692	HCD (High Energy Collision Dissociation)	MS2	3.96248	60	21.2339	6454	20241018_FJ_VOLTA_MP_Easy15_45min_1891_DDA_200ng_3.raw	F11	2.09	1
FALSE	High	Sequest HT (A2)	Unambiguous	[K].TVEGAGSIAAATGFVK.[K]		1	SYUA_HUMAN_P37840	SYUA_HUMAN_P37840	0	2	0.5598	0	1	1	739.898	1478.79	1478.78	2.08	0.00154	248214	HCD (High Energy Collision Dissociation)	MS2	3.26484	60	25.1103	9210	20241018_FJ_VOLTA_MP_Easy15_45min_1891_DDA_200ng_9.raw	F5	2.09	1
FALSE	High	Sequest HT (A2)	Unambiguous	[K].EGVLYVGSK.[T]		1	SYUA_HUMAN_P37840	SYUA_HUMAN_P37840	0	2	0.5455	0	1	1	476.26	951.513	951.515	-1.99	-0.00095	4.70598e+06	HCD (High Energy Collision Dissociation)	MS2	5.27783	60	12.0253	3932	20241018_FJ_VOLTA_MP_Easy15_45min_1891_DDA_200ng_12.raw	F2	2.09	1
FALSE	High	Sequest HT (A2)	Unambiguous	[K].TVEGAGSIAAATGFVK.[K]		1	SYUA_HUMAN_P37840	SYUA_HUMAN_P37840	0	2	0.649	0	1	1	739.896	1478.79	1478.78	0.26	0.0002	298246	HCD (High Energy Collision Dissociation)	MS2	4.71013	60	20.9127	5681	20241018_FJ_VOLTA_MP_Easy15_45min_1891_DDA_200ng_6.raw	F8	2.08	1
FALSE	High	Sequest HT (A2)	Unambiguous	[K].EGVLYVGSK.[T]		1	SYUA_HUMAN_P37840	SYUA_HUMAN_P37840	0	2	0.5962	0	1	1	476.263	951.519	951.515	4.17	0.00198	245188	HCD (High Energy Collision Dissociation)	MS2	3.86013	60	15.0228	5293	20241018_FJ_VOLTA_MP_Easy15_45min_1891_DDA_200ng_11.raw	F3	2.08	1
FALSE	High	Sequest HT (A2)	Unambiguous	[K].EGVLYVGSK.[T]		1	SYUA_HUMAN_P37840	SYUA_HUMAN_P37840	0	2	0.5625	0	1	1	476.262	951.518	951.515	3.21	0.00153	519557	HCD (High Energy Collision Dissociation)	MS2	1.53013	60	12.9954	3994	20241018_FJ_VOLTA_MP_Easy15_45min_1891_DDA_200ng_9.raw	F5	2.08	1
FALSE	High	Sequest HT (A2)	Unambiguous	[K].EGVLYVGSK.[T]		1	SYUA_HUMAN_P37840	SYUA_HUMAN_P37840	0	2	0.5865	0	1	1	476.262	951.517	951.515	2.82	0.00134	593784	HCD (High Energy Collision Dissociation)	MS2	32.5919	60	14.5206	5069	20241018_FJ_VOLTA_MP_Easy15_45min_1891_DDA_200ng_11.raw	F3	2.08	1
FALSE	High	Sequest HT (A2)	Unambiguous	[K].EGVLYVGSK.[T]		1	SYUA_HUMAN_P37840	SYUA_HUMAN_P37840	0	2	0.57	0	1	1	476.26	951.513	951.515	-1.15	-0.00055	1.13336e+06	HCD (High Energy Collision Dissociation)	MS2	38.6189	60	11.7159	3071	20241018_FJ_VOLTA_MP_Easy15_45min_1891_DDA_200ng_4.raw	F10	2.07	1
FALSE	High	Sequest HT (A2)	Unambiguous	[-].mDVFmK.[G]	M1(Oxidation); M5(Oxidation)	1	SYUA_HUMAN_P37840	SYUA_HUMAN_P37840	0	2	0.1256	0	1	1	401.678	802.348	802.347	0.79	0.00032	2.64501e+06	HCD (High Energy Collision Dissociation)	MS2	2.3242	60	7.5026	1737	20241018_FJ_VOLTA_MP_Easy15_45min_1891_DDA_200ng_10.raw	F4	2.07	1
FALSE	High	Sequest HT (A2)	Unambiguous	[K].TVeGAGSIAAATGFVK.[K]	E3(Oxidation)	1	SYUA_HUMAN_P37840	SYUA_HUMAN_P37840	0	2		0.019	2	2	747.887	1494.77	1494.78	-8.26	-0.00617	462288	HCD (High Energy Collision Dissociation)	MS2	42.6391	60	20.9807	7888	20241018_FJ_VOLTA_MP_Easy15_45min_1891_DDA_200ng_11.raw	F3	2.07	1
FALSE	High	Sequest HT (A2)	Unambiguous	[K].EGVLYVGSK.[T]		1	SYUA_HUMAN_P37840	SYUA_HUMAN_P37840	0	2	0.599	0	1	1	476.262	951.517	951.515	2.37	0.00113	390366	HCD (High Energy Collision Dissociation)	MS2	7.76196	60	12.6827	3234	20241018_FJ_VOLTA_MP_Easy15_45min_1891_DDA_200ng_2.raw	F12	2.07	1
FALSE	High	Sequest HT (A2)	Unambiguous	[R].GATGLGLK.[E]		2	C5A0S6	C5A0S6; B7MRB2	0	2	0.4466	0	1	1	358.719	716.43	716.43	-0.19	-7e-05	303649	HCD (High Energy Collision Dissociation)	MS2	16.2197	60	8.2295	1945	20241018_FJ_VOLTA_MP_Easy15_45min_1891_DDA_200ng_5.raw	F9	2.06	1
FALSE	High	Sequest HT (A2)	Unambiguous	[K].TVEGAGSIAAATGFVK.[K]		1	SYUA_HUMAN_P37840	SYUA_HUMAN_P37840	0	2	0.7122	0	1	1	739.898	1478.79	1478.78	2.66	0.00197	285715	HCD (High Energy Collision Dissociation)	MS2	16.7275	60	19.3434	6758	20241018_FJ_VOLTA_MP_Easy15_45min_1891_DDA_200ng_7.raw	F7	2.05	1
FALSE	High	Sequest HT (A2)	Unambiguous	[-].mDVFmK.[G]	M1(Oxidation); M5(Oxidation)	1	SYUA_HUMAN_P37840	SYUA_HUMAN_P37840	0	2	0.1122	0	1	1	401.678	802.349	802.347	2.62	0.00105	4.39123e+06	HCD (High Energy Collision Dissociation)	MS2	9.87732	60	8.3834	2335	20241018_FJ_VOLTA_MP_Easy15_45min_1891_DDA_200ng_11.raw	F3	2.05	1
FALSE	High	Sequest HT (A2)	Unambiguous	[K].TVEGAGSIAAATGFVK.[K]		1	SYUA_HUMAN_P37840	SYUA_HUMAN_P37840	0	2	0.5951	0	1	1	739.896	1478.79	1478.78	0.26	0.0002	360468	HCD (High Energy Collision Dissociation)	MS2	0	60	20.8725	6813	20241018_FJ_VOLTA_MP_Easy15_45min_1891_DDA_200ng_5.raw	F9	2.05	1
FALSE	High	Sequest HT (A2)	Unambiguous	[K].EGvvHGVATVAEK.[T]	V3(Oxidation); V4(Oxidation)	1	SYUA_HUMAN_P37840	SYUA_HUMAN_P37840	0	2	0.0634	0	1	1	664.347	1327.69	1327.69	1.2	0.0008	647978	HCD (High Energy Collision Dissociation)	MS2	0	60	13.0278	3890	20241018_FJ_VOLTA_MP_Easy15_45min_1891_DDA_200ng_10.raw	F4	2.05	1
FALSE	High	Sequest HT (A2)	Unambiguous	[K].EGVVAAAEK.[T]		1	SYUA_HUMAN_P37840	SYUA_HUMAN_P37840	0	2	0.522	0	1	1	437.239	873.47	873.468	3.02	0.00132	585392	HCD (High Energy Collision Dissociation)	MS2	49.8837	60	7.3915	1832	20241018_FJ_VOLTA_MP_Easy15_45min_1891_DDA_200ng_7.raw	F7	2.05	1
FALSE	High	Sequest HT (A2)	Unambiguous	[K].TVEGAGSIAAATGFVK.[K]		1	SYUA_HUMAN_P37840	SYUA_HUMAN_P37840	0	2	0.4976	0	1	1	739.897	1478.79	1478.78	1.42	0.00105	188888	HCD (High Energy Collision Dissociation)	MS2	9.19338	60	34.3929	14539	20241018_FJ_VOLTA_MP_Easy15_45min_1891_DDA_200ng_11.raw	F3	2.05	1
FALSE	High	Sequest HT (A2)	Unambiguous	[K].EGVVHGVATVAEk.[T]	K13(Oxidation)	1	SYUA_HUMAN_P37840	SYUA_HUMAN_P37840	0	2	0.0784	0	1	1	656.351	1311.69	1311.69	3.02	0.00198	351183	HCD (High Energy Collision Dissociation)	MS2	2.8716	60	7.3686	1692	20241018_FJ_VOLTA_MP_Easy15_45min_1891_DDA_200ng_9.raw	F5	2.04	1
FALSE	High	Sequest HT (A2)	Unambiguous	[-].mDVFmK.[G]	M1(Oxidation); M5(Oxidation)	1	SYUA_HUMAN_P37840	SYUA_HUMAN_P37840	0	2	0.1373	0	1	1	401.677	802.347	802.347	-0.96	-0.00038	3.03373e+06	HCD (High Energy Collision Dissociation)	MS2	10.5719	60	7.9108	2034	20241018_FJ_VOLTA_MP_Easy15_45min_1891_DDA_200ng_7.raw	F7	2.04	1
FALSE	High	Sequest HT (A2)	Unambiguous	[K].EGVVHGVATVAEK.[T]		1	SYUA_HUMAN_P37840	SYUA_HUMAN_P37840	0	2	0.2549	0	1	1	648.353	1295.7	1295.7	2.33	0.00151	395452	HCD (High Energy Collision Dissociation)	MS2	0	60	8.6532	2316	20241018_FJ_VOLTA_MP_Easy15_45min_1891_DDA_200ng_7.raw	F7	2.04	1
FALSE	High	Sequest HT (A2)	Unambiguous	[K].TKEGVVHGVATVAEK.[T]		1	SYUA_HUMAN_P37840	SYUA_HUMAN_P37840	1	2	0.6995	0	1	1	762.923	1524.84	1524.84	0.26	0.0002	181179	HCD (High Energy Collision Dissociation)	MS2	0	60	6.4406	1247	20241018_FJ_VOLTA_MP_Easy15_45min_1891_DDA_200ng_3.raw	F11	2.03	1
FALSE	High	Sequest HT (A2)	Unambiguous	[-].mDVfMk.[G]	M1(Oxidation); F4(Oxidation); K6(Oxidation)	1	SYUA_HUMAN_P37840	SYUA_HUMAN_P37840	0	2	0.1379	0	1	1	409.676	818.345	818.342	2.96	0.00121	3704230	HCD (High Energy Collision Dissociation)	MS2	4.01081	60	7.0952	1764	20241018_FJ_VOLTA_MP_Easy15_45min_1891_DDA_200ng_11.raw	F3	2.03	1
FALSE	High	Sequest HT (A2)	Unambiguous	[K].EGVvHGvATVAEK.[T]	V4(Oxidation); V7(Oxidation)	1	SYUA_HUMAN_P37840	SYUA_HUMAN_P37840	0	2	0.005	0	1	1	664.348	1327.69	1327.69	2.21	0.00147	1.47526e+06	HCD (High Energy Collision Dissociation)	MS2	2.0011	60	11.0187	3198	20241018_FJ_VOLTA_MP_Easy15_45min_1891_DDA_200ng_9.raw	F5	2.02	1
FALSE	High	Sequest HT (A2)	Unambiguous	[K].EqVTNVGGAVVTGVTAVAqK.[T]	Q2(Deamidated); Q19(Deamidated)	1	SYUA_HUMAN_P37840	SYUA_HUMAN_P37840	0	2	0.6634	0	1	1	965.512	1930.02	1930.01	1.7	0.00164	278472	HCD (High Energy Collision Dissociation)	MS2	0	60	26.1548	6699	20241018_FJ_VOLTA_MP_Easy15_45min_1891_DDA_200ng_13.raw	F1	2.02	1
FALSE	High	Sequest HT (A2)	Unambiguous	[K].EGVlYVGSK.[T]	L4(Oxidation)	1	SYUA_HUMAN_P37840	SYUA_HUMAN_P37840	0	2	0.1343	0	1	1	484.259	967.512	967.509	2.23	0.00108	414624	HCD (High Energy Collision Dissociation)	MS2	28.8536	60	10.4308	3243	20241018_FJ_VOLTA_MP_Easy15_45min_1891_DDA_200ng_11.raw	F3	2.01	1
FALSE	High	Sequest HT (A2)	Unambiguous	[R].NVqLDpAANLGVVK.[V]	Q3(Deamidated); P6(Oxidation)	6	B7NFK0	B7NFK0; B1LMU2; B5YZ39; A7ZUB3; B7UNM3; B7NUA6	0	2	0.1542	0	1	1	727.896	1454.79	1454.78	0.27	0.0002	305217	HCD (High Energy Collision Dissociation)	MS2	27.6964	60	17.0936	6203	20241018_FJ_VOLTA_MP_Easy15_45min_1891_DDA_200ng_12.raw	F2	2.01	1
FALSE	High	Sequest HT (A2)	Unambiguous	[K].qGVAEAAGK.[T]	Q1(Deamidated)	1	SYUA_HUMAN_P37840	SYUA_HUMAN_P37840	0	2	0.4726	0	1	1	416.215	831.422	831.421	1.8	0.00075	328481	HCD (High Energy Collision Dissociation)	MS2	6.90724	60	6.3484	1225	20241018_FJ_VOLTA_MP_Easy15_45min_1891_DDA_200ng_13.raw	F1	2.01	1
FALSE	High	Sequest HT (A2)	Unambiguous	[K].EGvvHGVATVAEK.[T]	V3(Oxidation); V4(Oxidation)	1	SYUA_HUMAN_P37840	SYUA_HUMAN_P37840	0	2		0.005	2	2	664.348	1327.69	1327.69	2.21	0.00147	1.47526e+06	HCD (High Energy Collision Dissociation)	MS2	2.0011	60	11.0187	3198	20241018_FJ_VOLTA_MP_Easy15_45min_1891_DDA_200ng_9.raw	F5	2.01	1
FALSE	High	Sequest HT (A2)	Unambiguous	[K].VGDTVIEFDLPLLEEK.[A]		1	P69783	P69783	0	2	0.735	0	1	1	908.987	1816.97	1816.96	5.27	0.00479	83076.9	HCD (High Energy Collision Dissociation)	MS2	0	60	32.5277	13064	20241018_FJ_VOLTA_MP_Easy15_45min_1891_DDA_200ng_7.raw	F7	2	1
FALSE	High	Sequest HT (A2)	Unambiguous	[K].qGVAEAAGK.[T]	Q1(Deamidated)	1	SYUA_HUMAN_P37840	SYUA_HUMAN_P37840	0	2	0.4673	0	1	1	416.214	831.421	831.421	0.03	1e-05	355497	HCD (High Energy Collision Dissociation)	MS2	2.75306	60	20.544	3672	20241018_FJ_VOLTA_MP_Easy15_45min_1891_DDA_200ng_1_241018150029.raw	F13	1.99	1
FALSE	High	Sequest HT (A2)	Unambiguous	[K].SAGGIVLTGSAAAK.[S]		1	B1XDP6	B1XDP6	0	2	0.5779	0	1	1	601.841	1202.68	1202.67	1.38	0.00083	243174	HCD (High Energy Collision Dissociation)	MS2	0	60	11.7662	3145	20241018_FJ_VOLTA_MP_Easy15_45min_1891_DDA_200ng_3.raw	F11	1.99	1
FALSE	High	Sequest HT (A2)	Unambiguous	[K].LSGSVTVGETPVIR.[I]		1	P69783	P69783	0	2	0.6515	0	1	1	707.901	1414.8	1414.79	3.67	0.0026	77979.2	HCD (High Energy Collision Dissociation)	MS2	8.48014	60	24.1441	5471	20241018_FJ_VOLTA_MP_Easy15_45min_1891_DDA_200ng_1_241018150029.raw	F13	1.98	1
FALSE	High	Sequest HT (A2)	Unambiguous	[K].TVEGAGSIAAATGFVK.[K]		1	SYUA_HUMAN_P37840	SYUA_HUMAN_P37840	0	2	0.5101	0	1	1	739.896	1478.79	1478.78	0.51	0.00038	332633	HCD (High Energy Collision Dissociation)	MS2	2.92617	60	19.8561	5773	20241018_FJ_VOLTA_MP_Easy15_45min_1891_DDA_200ng_4.raw	F10	1.98	1
FALSE	High	Sequest HT (A2)	Unambiguous	[K].EGVVAAAEK.[T]		1	SYUA_HUMAN_P37840	SYUA_HUMAN_P37840	0	2	0.6111	0	1	1	437.238	873.469	873.468	2.11	0.00092	503131	HCD (High Energy Collision Dissociation)	MS2	12.0689	60	7.8999	2030	20241018_FJ_VOLTA_MP_Easy15_45min_1891_DDA_200ng_7.raw	F7	1.98	1
FALSE	High	Sequest HT (A2)	Unambiguous	[K].EGVLYVGSK.[T]		1	SYUA_HUMAN_P37840	SYUA_HUMAN_P37840	0	2	0.6244	0	1	1	476.262	951.517	951.515	2.25	0.00107	200918	HCD (High Energy Collision Dissociation)	MS2	26.36	60	16.637	5983	20241018_FJ_VOLTA_MP_Easy15_45min_1891_DDA_200ng_11.raw	F3	1.97	1
FALSE	High	Sequest HT (A2)	Unambiguous	[K].VGDIVIFNDGYGVK.[S]		1	B1XDP6	B1XDP6	0	2	1	0	1	1	748.394	1495.78	1495.78	1.05	0.00078	266577	HCD (High Energy Collision Dissociation)	MS2	0	60	25.9959	8254	20241018_FJ_VOLTA_MP_Easy15_45min_1891_DDA_200ng_3.raw	F11	1.97	1
FALSE	High	Sequest HT (A2)	Unambiguous	[K].MvAPVDGTIGK.[I]	V2(Oxidation)	1	P69783	P69783	0	2	0.0305	0	1	1	552.292	1103.58	1103.58	-0.16	-9e-05	345182	HCD (High Energy Collision Dissociation)	MS2	21.8295	60	9.3575	2785	20241018_FJ_VOLTA_MP_Easy15_45min_1891_DDA_200ng_12.raw	F2	1.97	1
FALSE	High	Sequest HT (A2)	Unambiguous	[K].VGDIVIFnDGYGVK.[S]	N8(Deamidated)	1	B1XDP6	B1XDP6	0	2	0.7208	0	1	1	748.885	1496.76	1496.76	-0.26	-0.0002	70491	HCD (High Energy Collision Dissociation)	MS2	45.3521	60	26.9778	8664	20241018_FJ_VOLTA_MP_Easy15_45min_1891_DDA_200ng_3.raw	F11	1.97	1
FALSE	High	Sequest HT (A2)	Unambiguous	[-].mDVfMk.[G]	M1(Oxidation); F4(Oxidation); K6(Oxidation)	1	SYUA_HUMAN_P37840	SYUA_HUMAN_P37840	0	2	0.1269	0	1	1	409.676	818.344	818.342	2.07	0.00085	3684752	HCD (High Energy Collision Dissociation)	MS2	2.96948	60	7.1245	1581	20241018_FJ_VOLTA_MP_Easy15_45min_1891_DDA_200ng_9.raw	F5	1.97	1
FALSE	High	Sequest HT (A2)	Unambiguous	[K].YKDRLASAqK.[E]	Q9(Deamidated)	3	Q8FFH5	Q8FFH5; Q0TFD0; B1IXM6	2	2	0.5076	0	1	1	590.821	1180.63	1180.63	1.5	0.00089	778058	HCD (High Energy Collision Dissociation)	MS2	18.7705	60	13.2274	4107	20241018_FJ_VOLTA_MP_Easy15_45min_1891_DDA_200ng_9.raw	F5	1.97	1
FALSE	High	Sequest HT (A2)	Unambiguous	[K].EGVlYVGSK.[T]	L4(Oxidation)	1	SYUA_HUMAN_P37840	SYUA_HUMAN_P37840	0	2	0.1327	0	1	1	484.259	967.511	967.509	1.85	0.00089	1.28358e+06	HCD (High Energy Collision Dissociation)	MS2	2.39615	60	8.3516	2107	20241018_FJ_VOLTA_MP_Easy15_45min_1891_DDA_200ng_9.raw	F5	1.96	1
FALSE	High	Sequest HT (A2)	Unambiguous	[-].mDVFmK.[G]	N-Term(Prot)(Acetyl); M5(Oxidation)	1	SYUA_HUMAN_P37840	SYUA_HUMAN_P37840	0	2	0.1429	0	1	1	414.685	828.364	828.363	0.81	0.00034	1.08976e+06	HCD (High Energy Collision Dissociation)	MS2	0	60	11.7549	3783	20241018_FJ_VOLTA_MP_Easy15_45min_1891_DDA_200ng_11.raw	F3	1.96	1
FALSE	High	Sequest HT (A2)	Unambiguous	[K].qVLSnLLSnALK.[F]	Q1(Deamidated); N5(Deamidated); N9(Deamidated)	2	P58402	P58402; P30855	0	2	0.3929	0	1	1	651.862	1302.72	1302.72	1.79	0.00117	5574885	HCD (High Energy Collision Dissociation)	MS2	0.966039	60	30.9967	10432	20241018_FJ_VOLTA_MP_Easy15_45min_1891_DDA_200ng_10.raw	F4	1.96	1
FALSE	High	Sequest HT (A2)	Unambiguous	[K].TVEGAGSIAAATGFVK.[K]		1	SYUA_HUMAN_P37840	SYUA_HUMAN_P37840	0	2	0.5077	0	1	1	739.898	1478.79	1478.78	2	0.00148	321706	HCD (High Energy Collision Dissociation)	MS2	0	60	33.3745	14099	20241018_FJ_VOLTA_MP_Easy15_45min_1891_DDA_200ng_11.raw	F3	1.95	1
FALSE	High	Sequest HT (A2)	Unambiguous	[K].TVEGAGsIAAATGFVK.[K]	S7(Oxidation)	1	SYUA_HUMAN_P37840	SYUA_HUMAN_P37840	0	2	0.1538	0	1	1	747.895	1494.78	1494.78	1.38	0.00103	830218	HCD (High Energy Collision Dissociation)	MS2	4.4891	60	20.3947	7149	20241018_FJ_VOLTA_MP_Easy15_45min_1891_DDA_200ng_9.raw	F5	1.95	1
FALSE	High	Sequest HT (A2)	Unambiguous	[K].EGVVHGvATVAEK.[T]	V7(Oxidation)	1	SYUA_HUMAN_P37840	SYUA_HUMAN_P37840	0	2	0.0881	0	1	1	656.35	1311.69	1311.69	1.53	0.001	173306	HCD (High Energy Collision Dissociation)	MS2	0	60	6.3191	1199	20241018_FJ_VOLTA_MP_Easy15_45min_1891_DDA_200ng_9.raw	F5	1.93	1
FALSE	High	Sequest HT (A2)	Unambiguous	[K].EGVLYVGSK.[T]		1	SYUA_HUMAN_P37840	SYUA_HUMAN_P37840	0	2	0.5596	0	1	1	476.26	951.513	951.515	-1.67	-0.00079	363743	HCD (High Energy Collision Dissociation)	MS2	49.2635	60	11.4412	3287	20241018_FJ_VOLTA_MP_Easy15_45min_1891_DDA_200ng_10.raw	F4	1.93	1
FALSE	High	Sequest HT (A2)	Selected	[K].GLGElQVSr.[E]	L5(Oxidation); R9(Deamidated)	1	P05845	P05845	0	2	0.0155	0	1	1	488.259	975.51	975.511	-0.63	-0.00031	27823546	HCD (High Energy Collision Dissociation)	MS2	8.51642	60	6.1793	1301	20241018_FJ_VOLTA_MP_Easy15_45min_1891_DDA_200ng_11.raw	F3	1.93	1
FALSE	High	Sequest HT (A2)	Unambiguous	[K].EGVVHGvATvAEK.[T]	V7(Oxidation); V10(Oxidation)	1	SYUA_HUMAN_P37840	SYUA_HUMAN_P37840	0	2	0.1088	0	1	1	664.349	1327.69	1327.69	3.78	0.00251	371791	HCD (High Energy Collision Dissociation)	MS2	19.1548	60	13.343	4522	20241018_FJ_VOLTA_MP_Easy15_45min_1891_DDA_200ng_11.raw	F3	1.93	1
FALSE	High	Sequest HT (A2)	Unambiguous	[K].EGVLYVGSK.[T]		1	SYUA_HUMAN_P37840	SYUA_HUMAN_P37840	0	2	0.4167	0	1	1	476.259	951.51	951.515	-4.62	-0.0022	853889	HCD (High Energy Collision Dissociation)	MS2	0	60	7.5177	1970	20241018_FJ_VOLTA_MP_Easy15_45min_1891_DDA_200ng_11.raw	F3	1.92	1
FALSE	High	Sequest HT (A2)	Unambiguous	[K].EGvvHGVATVAEK.[T]	V3(Oxidation); V4(Oxidation)	1	SYUA_HUMAN_P37840	SYUA_HUMAN_P37840	0	2	0.0781	0	1	1	664.348	1327.69	1327.69	2.21	0.00147	1.21332e+06	HCD (High Energy Collision Dissociation)	MS2	0	60	11.0992	3342	20241018_FJ_VOLTA_MP_Easy15_45min_1891_DDA_200ng_7.raw	F7	1.92	1
FALSE	High	Sequest HT (A2)	Unambiguous	[R].DAVIDVvr.[K]	V7(Oxidation); R8(Deamidated)	1	P39333	P39333	0	2	0.1458	0	1	1	452.242	903.477	903.478	-1.07	-0.00048	1.26942e+06	HCD (High Energy Collision Dissociation)	MS2	5.1285	60	10.864	3130	20241018_FJ_VOLTA_MP_Easy15_45min_1891_DDA_200ng_9.raw	F5	1.92	1
FALSE	High	Sequest HT (A2)	Unambiguous	[K].mVAPVDGTIGK.[I]	M1(Oxidation)	1	P69783	P69783	0	2		0.0305	2	2	552.292	1103.58	1103.58	-0.16	-9e-05	345182	HCD (High Energy Collision Dissociation)	MS2	21.8295	60	9.3575	2785	20241018_FJ_VOLTA_MP_Easy15_45min_1891_DDA_200ng_12.raw	F2	1.91	1
FALSE	High	Sequest HT (A2)	Unambiguous	[R].nGVKGFpK.[R]	N1(Oxidation); P7(Oxidation)	6	C4ZPY3	C4ZPY3; A7ZW09; B7UIA5; A1A7A6; A7ZHF0; B7MNR6	1	2	0.0789	0	1	1	439.74	878.473	878.473	0.24	0.0001	1.01043e+06	HCD (High Energy Collision Dissociation)	MS2	0	60	6.3609	1398	20241018_FJ_VOLTA_MP_Easy15_45min_1891_DDA_200ng_11.raw	F3	1.9	1
FALSE	High	Sequest HT (A2)	Unambiguous	[K].TQLIDVIAEK.[A]		1	E0J6W8	E0J6W8	0	2	0.6737	0	1	1	565.326	1129.65	1129.65	-1	-0.00056	355272	HCD (High Energy Collision Dissociation)	MS2	29.3817	60	20.8172	7809	20241018_FJ_VOLTA_MP_Easy15_45min_1891_DDA_200ng_11.raw	F3	1.9	1
FALSE	High	Sequest HT (A2)	Unambiguous	[R].DAVIDVvr.[K]	V7(Oxidation); R8(Deamidated)	1	P39333	P39333	0	2	0.1474	0	1	1	452.244	903.48	903.478	2.1	0.00095	918602	HCD (High Energy Collision Dissociation)	MS2	4.62272	60	11.0548	3326	20241018_FJ_VOLTA_MP_Easy15_45min_1891_DDA_200ng_7.raw	F7	1.9	1
FALSE	High	Sequest HT (A2)	Rejected	[R].VAqSlGVpr.[E]	Q3(Oxidation); L5(Oxidation); P8(Oxidation); R9(Deamidated)	1		P0AB02	0	2		0.0155	2	2	488.259	975.51	975.511	-0.63	-0.00031	27823546	HCD (High Energy Collision Dissociation)	MS2	8.51642	60	6.1793	1301	20241018_FJ_VOLTA_MP_Easy15_45min_1891_DDA_200ng_11.raw	F3	1.9	0
